# Supplementary material for: Conditioned medium from Adipose Stromal Cells reduces cisplatin-induced proximal tubular epithelial cell apoptosis via downregulation of miR-181a-5p
Source: Research Square preprint supplement (doi:10.21203/rs.3.rs-6751099/v1), 2025-06-09
Supplement: Supplementary file 1 [file 16a1e0f95d4d42a713c6d7f5.xlsx]

## Sheet: Foglio1
sRNA.readcount	CTR_101.readcount	CTR_87.readcount	CTR_96.readcount	CTR_SFM2.readcount	CTR_SMF1.readcount	Cis_101.readcount	Cis_87.readcount	Cis_96.readcount	Cis_SFM1.readcount	Cis_SFM2.readcount	CTR_101.tpm	CTR_87.tpm	CTR_96.tpm	CTR_SFM2.tpm	CTR_SMF1.tpm	Cis_101.tpm	Cis_87.tpm	Cis_96.tpm	Cis_SFM1.tpm	Cis_SFM2.tpm
hsa-let-7a-2-3p	2	4	4	2	7	1	7	2	2	8	0.342621	0.491493	0.576696	0.339009	1.01514	0.167982	1.06382	0.243217	0.260248	0.924092
hsa-let-7a-3p	93	159	153	123	173	73	103	161	162	270	15.9319	19.5368	22.0586	20.849	25.0885	12.2627	15.6534	19.579	21.0801	31.1881
hsa-let-7a-5p	68691	69435	98811	43980	78518	34164	45205	76467	38485	90545	11767.5	8531.7	14246	7454.8	11386.7	5738.95	6870.02	9299.04	5007.82	10459
hsa-let-7b-3p	26	42	54	18	57	30	46	51	54	41	4.45407	5.16068	7.7854	3.05108	8.26615	5.03947	6.99084	6.20203	7.0267	4.73597
hsa-let-7b-5p	10036	11871	16966	7643	14797	6880	9109	11734	7377	16804	1719.27	1458.63	2446.06	1295.52	2145.86	1155.72	1384.34	1426.95	959.925	1941.05
hsa-let-7c-3p	5	6	7	16	12	0	3	3	10	19	0.856552	0.737239	1.00922	2.71207	1.74024	0	0.455924	0.364825	1.30124	2.19472
hsa-let-7c-5p	5103	6343	10281	4805	7254	3198	4267	6353	3491	7415	874.197	779.385	1482.25	814.469	1051.98	537.208	648.476	772.579	454.263	856.518
hsa-let-7d-3p	369	754	934	647	886	506	529	693	767	904	63.2136	92.6464	134.659	109.669	128.488	84.9991	80.3947	84.2747	99.8052	104.422
hsa-let-7d-5p	2806	3693	4953	1814	4598	1452	1746	2797	1724	4156	480.697	453.771	714.094	307.481	666.803	243.91	265.348	340.139	224.334	480.066
hsa-let-7e-3p	68	84	119	51	119	72	86	109	81	116	11.6491	10.3214	17.1567	8.64472	17.2574	12.0947	13.0698	13.2553	10.54	13.3993
hsa-let-7e-5p	8330	9782	9798	5189	9001	5481	7530	11403	4616	10333	1427.02	1201.95	1412.62	879.558	1305.33	920.711	1144.37	1386.7	600.653	1193.58
hsa-let-7f-1-3p	21	8	21	15	12	6	18	11	9	15	3.59752	0.982986	3.02766	2.54257	1.74024	1.00789	2.73555	1.33769	1.17112	1.73267
hsa-let-7f-2-3p	0	2	5	2	1	1	2	8	3	2	0	0.245746	0.72087	0.339009	0.14502	0.167982	0.30395	0.972868	0.390372	0.231023
hsa-let-7f-5p	277088	282424	321040	169708	239820	166418	200394	341999	171207	306605	47468.1	34702.4	46285.7	28766.3	34778.7	27955.3	30454.8	41590	22278.1	35416.4
hsa-let-7g-3p	5	3	9	10	13	1	1	9	4	2	0.856552	0.36862	1.29757	1.69504	1.88526	0.167982	0.151975	1.09448	0.520496	0.231023
hsa-let-7g-5p	159670	195418	219325	92132	158862	99420	105967	183032	105253	172692	27353.1	24011.6	31621	15616.8	23038.2	16700.8	16104.3	22258.2	13695.9	19947.9
hsa-let-7i-3p	0	2	4	3	10	0	1	7	6	9	0	0.245746	0.576696	0.508513	1.4502	0	0.151975	0.851259	0.780744	1.0396
hsa-let-7i-5p	275301	368835	376504	260243	363993	243155	291388	332918	302207	453930	47162	45320	54282.1	44112.3	52786.3	40845.8	44283.6	40485.7	39324.4	52434.1
hsa-miR-100-3p	2	2	2	1	5	3	5	2	14	1	0.342621	0.245746	0.288348	0.169504	0.725101	0.503947	0.759874	0.243217	1.82174	0.115511
hsa-miR-100-5p	69311	96284	87172	66952	71111	78658	90497	90754	86956	85592	11873.7	11830.7	12567.9	11348.7	10312.5	13213.2	13753.3	11036.5	11315.1	9886.86
hsa-miR-101-3p	4040	5785	6014	5978	5416	5289	6658	9910	7045	6838	692.094	710.822	867.063	1013.3	785.429	888.459	1011.85	1205.14	916.724	789.867
hsa-miR-10392-5p	2	6	1	2	3	4	0	1	0	4	0.342621	0.737239	0.144174	0.339009	0.435061	0.67193	0	0.121608	0	0.462046
hsa-miR-10393-5p	0	0	0	0	0	0	0	1	0	0	0	0	0	0	0	0	0	0.121608	0	0
hsa-miR-10394-5p	0	0	0	0	0	0	0	1	0	0	0	0	0	0	0	0	0	0.121608	0	0
hsa-miR-10395-3p	9	11	29	21	12	12	13	22	26	34	1.54179	1.35161	4.18105	3.55959	1.74024	2.01579	1.97567	2.67539	3.38323	3.92739
hsa-miR-10398-3p	0	1	0	0	0	0	0	0	0	0	0	0.122873	0	0	0	0	0	0	0	0
hsa-miR-10399-3p	0	5	2	1	0	0	0	1	0	0	0	0.614366	0.288348	0.169504	0	0	0	0.121608	0	0
hsa-miR-10399-5p	2	0	2	4	0	2	3	3	0	1	0.342621	0	0.288348	0.678018	0	0.335965	0.455924	0.364825	0	0.115511
hsa-miR-103a-2-5p	1	1	2	0	0	1	2	0	0	6	0.17131	0.122873	0.288348	0	0	0.167982	0.30395	0	0	0.693069
hsa-miR-103a-3p	22440	26686	32013	10045	26619	12531	17004	23621	14539	17850	3844.21	3279	4615.45	1702.67	3860.29	2104.99	2584.18	2872.51	1891.87	2061.88
hsa-miR-103b	21654	25723	31280	9740	26052	11683	16228	22543	13874	17111	3709.56	3160.67	4509.77	1650.97	3778.07	1962.54	2466.25	2741.42	1805.34	1976.52
hsa-miR-10401-3p	8	13	10	10	24	12	16	15	4	16	1.37048	1.59735	1.44174	1.69504	3.48048	2.01579	2.4316	1.82413	0.520496	1.84818
hsa-miR-10401-5p	2	0	0	0	0	0	0	0	0	0	0.342621	0	0	0	0	0	0	0	0	0
hsa-miR-10523-5p	1	1	1	1	5	6	3	5	2	10	0.17131	0.122873	0.144174	0.169504	0.725101	1.00789	0.455924	0.608042	0.260248	1.15511
hsa-miR-10525-3p	0	0	0	0	0	0	0	0	1	0	0	0	0	0	0	0	0	0	0.130124	0
hsa-miR-10527-5p	21	24	11	13	20	12	10	12	10	24	3.59752	2.94896	1.58591	2.20356	2.9004	2.01579	1.51975	1.4593	1.30124	2.77228
hsa-miR-105-5p	1	5	6	6	0	1	1	6	6	5	0.17131	0.614366	0.865045	1.01703	0	0.167982	0.151975	0.729651	0.780744	0.577557
hsa-miR-106a-5p	2	3	6	0	5	0	3	5	3	1	0.342621	0.36862	0.865045	0	0.725101	0	0.455924	0.608042	0.390372	0.115511
hsa-miR-106b-3p	3608	5312	5809	5422	4435	4868	5183	6211	6244	6045	618.088	652.703	837.507	919.053	643.165	817.738	787.685	755.31	812.495	698.267
hsa-miR-106b-5p	207	215	343	153	366	151	253	335	183	295	35.4613	26.4177	49.4517	25.9342	53.0774	25.3653	38.4496	40.7388	23.8127	34.0759
hsa-miR-107	183	165	255	96	278	61	162	207	145	210	31.3498	20.2741	36.7644	16.2724	40.3156	10.2469	24.6199	25.173	18.868	24.2574
hsa-miR-10a-3p	1750	2150	3500	1284	3826	679	1093	2077	1146	2396	299.793	264.177	504.609	217.644	554.847	114.06	166.108	252.581	149.122	276.765
hsa-miR-10a-5p	529975	802772	568550	520191	591690	649204	636408	724372	748693	715903	90790.3	98639.2	81970.2	88174.7	85807	109055	96718	88089.8	97423	82695
hsa-miR-10b-3p	438	541	645	417	697	208	275	497	385	689	75.034	66.4744	92.9923	70.6833	101.079	34.9403	41.7931	60.4394	50.0978	79.5874
hsa-miR-10b-5p	248938	360095	237941	243440	279667	327822	310358	380634	408267	401064	42645.7	44246	34304.9	41264.2	40557.4	55068.3	47166.6	46288.3	53125.4	46327.5
hsa-miR-11399	1	1	2	3	2	5	0	0	3	2	0.17131	0.122873	0.288348	0.508513	0.29004	0.839912	0	0	0.390372	0.231023
hsa-miR-11401	1	3	4	0	0	4	4	10	11	3	0.17131	0.36862	0.576696	0	0	0.67193	0.607899	1.21608	1.43136	0.346534
hsa-miR-1178-3p	0	0	0	3	0	4	0	0	0	0	0	0	0	0.508513	0	0.67193	0	0	0	0
hsa-miR-1179	1	2	0	0	0	0	0	0	0	0	0.17131	0.245746	0	0	0	0	0	0	0	0
hsa-miR-1180-3p	337	591	544	591	713	329	472	510	607	712	57.7316	72.6181	78.4307	100.177	103.399	55.2662	71.7321	62.0203	78.9853	82.2442
hsa-miR-1180-5p	0	0	0	0	0	0	0	0	0	1	0	0	0	0	0	0	0	0	0	0.115511
hsa-miR-1185-1-3p	0	8	0	0	0	0	1	3	0	0	0	0.982986	0	0	0	0	0.151975	0.364825	0	0
hsa-miR-1185-2-3p	0	0	0	0	0	0	0	3	0	0	0	0	0	0	0	0	0	0.364825	0	0
hsa-miR-12117	0	0	0	2	0	0	0	1	0	1	0	0	0	0.339009	0	0	0	0.121608	0	0.115511
hsa-miR-12125	0	0	0	0	0	0	0	0	4	4	0	0	0	0	0	0	0	0	0.520496	0.462046
hsa-miR-12136	14	4	16	4	11	3	8	9	2	1	2.39835	0.491493	2.30679	0.678018	1.59522	0.503947	1.2158	1.09448	0.260248	0.115511
hsa-miR-122-3p	0	0	1	0	0	0	0	1	0	0	0	0	0.144174	0	0	0	0	0.121608	0	0
hsa-miR-1224-5p	0	0	0	3	0	0	0	0	0	0	0	0	0	0.508513	0	0	0	0	0	0
hsa-miR-122-5p	179	274	196	195	128	180	290	282	264	232	30.6646	33.6673	28.2581	33.0534	18.5626	30.2368	44.0727	34.2936	34.3528	26.7987
hsa-miR-1226-3p	1	5	9	2	6	3	0	1	1	1	0.17131	0.614366	1.29757	0.339009	0.870121	0.503947	0	0.121608	0.130124	0.115511
hsa-miR-1226-5p	2	1	3	0	1	0	3	0	0	5	0.342621	0.122873	0.432522	0	0.14502	0	0.455924	0	0	0.577557
hsa-miR-1227-3p	0	0	0	0	2	1	0	0	0	0	0	0	0	0	0.29004	0.167982	0	0	0	0
hsa-miR-1228-3p	0	0	0	1	2	1	0	3	3	1	0	0	0	0.169504	0.29004	0.167982	0	0.364825	0.390372	0.115511
hsa-miR-1228-5p	0	0	0	6	0	0	3	1	0	0	0	0	0	1.01703	0	0	0.455924	0.121608	0	0
hsa-miR-1229-3p	0	0	4	1	2	0	0	0	3	0	0	0	0.576696	0.169504	0.29004	0	0	0	0.390372	0
hsa-miR-1229-5p	0	0	1	0	0	0	0	0	0	0	0	0	0.144174	0	0	0	0	0	0	0
hsa-miR-122b-3p	179	274	196	195	128	180	290	282	264	232	30.6646	33.6673	28.2581	33.0534	18.5626	30.2368	44.0727	34.2936	34.3528	26.7987
hsa-miR-122b-5p	0	0	1	0	0	0	0	3	0	0	0	0	0.144174	0	0	0	0	0.364825	0	0
hsa-miR-1231	0	0	0	0	0	0	1	0	0	0	0	0	0	0	0	0	0.151975	0	0	0
hsa-miR-1233-3p	0	5	0	0	0	0	0	1	0	0	0	0.614366	0	0	0	0	0	0.121608	0	0
hsa-miR-1234-3p	4	0	0	2	1	0	0	0	0	0	0.685242	0	0	0.339009	0.14502	0	0	0	0	0
hsa-miR-1236-3p	0	1	0	0	0	0	0	0	0	2	0	0.122873	0	0	0	0	0	0	0	0.231023
hsa-miR-1237-3p	2	0	0	0	2	2	0	0	0	1	0.342621	0	0	0	0.29004	0.335965	0	0	0	0.115511
hsa-miR-1243	0	0	0	0	0	2	0	0	0	0	0	0	0	0	0	0.335965	0	0	0	0
hsa-miR-124-3p	0	0	1	0	0	0	0	2	0	0	0	0	0.144174	0	0	0	0	0.243217	0	0
hsa-miR-1245a	0	1	0	0	0	0	0	0	0	1	0	0.122873	0	0	0	0	0	0	0	0.115511
hsa-miR-1245b-3p	0	1	0	1	0	0	0	3	0	0	0	0.122873	0	0.169504	0	0	0	0.364825	0	0
hsa-miR-1245b-5p	0	0	0	0	0	0	0	0	0	3	0	0	0	0	0	0	0	0	0	0.346534
hsa-miR-124-5p	0	0	1	0	0	0	0	1	0	0	0	0	0.144174	0	0	0	0	0.121608	0	0
hsa-miR-1246	49	32	46	44	57	71	100	62	35	64	8.39421	3.93194	6.63201	7.45819	8.26615	11.9267	15.1975	7.53973	4.55434	7.39273
hsa-miR-1248	3	5	9	0	1	8	2	4	8	5	0.513931	0.614366	1.29757	0	0.14502	1.34386	0.30395	0.486434	1.04099	0.577557
hsa-miR-1249-5p	2	0	0	0	0	0	0	4	2	0	0.342621	0	0	0	0	0	0	0.486434	0.260248	0
hsa-miR-1250-5p	0	0	0	0	0	0	6	0	0	0	0	0	0	0	0	0	0.911849	0	0	0
hsa-miR-1252-5p	2	4	0	7	2	0	0	6	2	1	0.342621	0.491493	0	1.18653	0.29004	0	0	0.729651	0.260248	0.115511
hsa-miR-1255a	33	41	32	13	32	30	43	59	33	53	5.65325	5.0378	4.61357	2.20356	4.64065	5.03947	6.53492	7.1749	4.29409	6.12211
hsa-miR-1255b-5p	2	2	4	2	1	3	2	4	7	12	0.342621	0.245746	0.576696	0.339009	0.14502	0.503947	0.30395	0.486434	0.910868	1.38614
hsa-miR-1256	0	0	0	0	0	0	0	1	0	1	0	0	0	0	0	0	0	0.121608	0	0.115511
hsa-miR-125a-3p	68	114	129	97	133	63	74	104	129	118	11.6491	14.0076	18.5985	16.4419	19.2877	10.5829	11.2461	12.6473	16.786	13.6304
hsa-miR-125a-5p	7748	12543	11155	6332	15468	6183	7477	8788	9159	14670	1327.31	1541.2	1608.26	1073.3	2243.17	1038.64	1136.32	1068.7	1191.81	1694.55
hsa-miR-125b-1-3p	285	543	537	599	664	282	428	474	598	766	48.8235	66.7202	77.4215	101.533	96.2934	47.371	65.0452	57.6424	77.8142	88.4818
hsa-miR-125b-2-3p	109	138	160	117	122	116	125	178	133	123	18.6728	16.9565	23.0679	19.832	17.6925	19.486	18.9969	21.6463	17.3065	14.2079
hsa-miR-125b-5p	2423	3305	3737	1942	4204	1736	2433	2709	2439	3328	415.085	406.096	538.779	329.178	609.665	291.617	369.755	329.437	317.373	384.422
hsa-miR-1260a	2	6	6	1	6	0	5	1	0	4	0.342621	0.737239	0.865045	0.169504	0.870121	0	0.759874	0.121608	0	0.462046
hsa-miR-1260b	116	160	447	157	266	42	132	151	105	157	19.872	19.6597	64.4458	26.6122	38.5754	7.05526	20.0607	18.3629	13.663	18.1353
hsa-miR-1262	4	11	10	13	10	9	11	11	1	13	0.685242	1.35161	1.44174	2.20356	1.4502	1.51184	1.67172	1.33769	0.130124	1.50165
hsa-miR-126-3p	2309	3457	2402	2865	2881	2151	3353	3063	3134	4063	395.556	424.773	346.306	485.63	417.803	361.33	509.572	372.487	407.809	469.323
hsa-miR-126-5p	4	7	1	5	8	0	5	9	1	3	0.685242	0.860113	0.144174	0.847522	1.16016	0	0.759874	1.09448	0.130124	0.346534
hsa-miR-1266-5p	4	5	3	1	1	0	2	5	3	3	0.685242	0.614366	0.432522	0.169504	0.14502	0	0.30395	0.608042	0.390372	0.346534
hsa-miR-1267	0	2	4	3	0	0	4	2	1	7	0	0.245746	0.576696	0.508513	0	0	0.607899	0.243217	0.130124	0.80858
hsa-miR-1268a	13	18	26	32	22	3	6	16	20	16	2.22704	2.21172	3.74853	5.42414	3.19044	0.503947	0.911849	1.94574	2.60248	1.84818
hsa-miR-1269a	0	0	2	0	2	2	0	0	2	1	0	0	0.288348	0	0.29004	0.335965	0	0	0.260248	0.115511
hsa-miR-1271-5p	27	60	61	48	49	31	31	41	28	56	4.62538	7.37239	8.79462	8.13621	7.10599	5.20745	4.71122	4.98595	3.64347	6.46864
hsa-miR-1272	0	0	0	0	0	0	1	0	0	0	0	0	0	0	0	0	0.151975	0	0	0
hsa-miR-1273c	3	0	0	1	0	0	0	1	4	2	0.513931	0	0	0.169504	0	0	0	0.121608	0.520496	0.231023
hsa-miR-1273h-5p	0	0	0	0	0	4	0	0	0	0	0	0	0	0	0	0.67193	0	0	0	0
hsa-miR-127-3p	59	53	49	100	37	27	31	46	44	49	10.1073	6.51228	7.06453	16.9504	5.36575	4.53552	4.71122	5.59399	5.72546	5.66006
hsa-miR-1275	0	0	3	0	0	0	0	0	1	1	0	0	0.432522	0	0	0	0	0	0.130124	0.115511
hsa-miR-127-5p	4	0	1	10	1	0	0	1	0	4	0.685242	0	0.144174	1.69504	0.14502	0	0	0.121608	0	0.462046
hsa-miR-1276	4	3	4	6	11	1	4	3	5	7	0.685242	0.36862	0.576696	1.01703	1.59522	0.167982	0.607899	0.364825	0.65062	0.80858
hsa-miR-1277-3p	0	0	3	5	0	0	0	5	0	0	0	0	0.432522	0.847522	0	0	0	0.608042	0	0
hsa-miR-1277-5p	8	8	3	8	10	0	2	6	3	8	1.37048	0.982986	0.432522	1.35604	1.4502	0	0.30395	0.729651	0.390372	0.924092
hsa-miR-1278	49	40	58	58	54	42	49	103	51	77	8.39421	4.91493	8.3621	9.83125	7.83109	7.05526	7.44677	12.5257	6.63633	8.89438
hsa-miR-128-1-5p	16	27	27	28	21	30	32	35	19	27	2.74097	3.31758	3.8927	4.74612	3.04542	5.03947	4.86319	4.2563	2.47236	3.11881
hsa-miR-128-2-5p	0	0	2	0	1	1	0	0	0	0	0	0	0.288348	0	0.14502	0.167982	0	0	0	0
hsa-miR-128-3p	9007	17675	10131	17603	14457	7716	11112	11114	15291	21569	1542.99	2171.78	1460.63	2983.79	2096.56	1296.15	1688.74	1351.56	1989.73	2491.47
hsa-miR-1284	3	13	1	6	4	4	2	5	6	15	0.513931	1.59735	0.144174	1.01703	0.580081	0.67193	0.30395	0.608042	0.780744	1.73267
hsa-miR-1285-3p	15	20	33	21	23	28	41	32	38	28	2.56966	2.45746	4.75774	3.55959	3.33546	4.70351	6.23097	3.89147	4.94471	3.23432
hsa-miR-1285-5p	0	1	0	3	14	0	7	5	2	7	0	0.122873	0	0.508513	2.03028	0	1.06382	0.608042	0.260248	0.80858
hsa-miR-1286	0	0	0	0	0	0	0	0	3	0	0	0	0	0	0	0	0	0	0.390372	0
hsa-miR-1287-3p	4	1	2	0	6	4	4	5	3	0	0.685242	0.122873	0.288348	0	0.870121	0.67193	0.607899	0.608042	0.390372	0
hsa-miR-1287-5p	109	144	178	127	173	80	91	149	122	140	18.6728	17.6937	25.663	21.5271	25.0885	13.4386	13.8297	18.1197	15.8751	16.1716
hsa-miR-1288-3p	5	13	14	17	4	16	20	15	16	10	0.856552	1.59735	2.01844	2.88157	0.580081	2.68772	3.0395	1.82413	2.08198	1.15511
hsa-miR-1288-5p	2	0	0	0	0	0	0	0	4	0	0.342621	0	0	0	0	0	0	0	0.520496	0
hsa-miR-1289	2	7	0	0	4	1	2	4	0	0	0.342621	0.860113	0	0	0.580081	0.167982	0.30395	0.486434	0	0
hsa-miR-1291	14	21	33	11	14	15	6	12	19	14	2.39835	2.58034	4.75774	1.86455	2.03028	2.51974	0.911849	1.4593	2.47236	1.61716
hsa-miR-129-1-3p	2	0	2	1	1	0	6	1	0	3	0.342621	0	0.288348	0.169504	0.14502	0	0.911849	0.121608	0	0.346534
hsa-miR-129-2-3p	0	3	4	1	6	4	2	5	0	3	0	0.36862	0.576696	0.169504	0.870121	0.67193	0.30395	0.608042	0	0.346534
hsa-miR-1292-5p	17	24	19	21	30	26	18	24	22	37	2.91228	2.94896	2.73931	3.55959	4.35061	4.36754	2.73555	2.9186	2.86273	4.27392
hsa-miR-1293	9	24	19	16	11	12	19	18	8	12	1.54179	2.94896	2.73931	2.71207	1.59522	2.01579	2.88752	2.18895	1.04099	1.38614
hsa-miR-1294	16	23	27	17	21	14	16	15	4	18	2.74097	2.82608	3.8927	2.88157	3.04542	2.35175	2.4316	1.82413	0.520496	2.07921
hsa-miR-1295a	0	0	0	3	0	0	2	0	0	0	0	0	0	0.508513	0	0	0.30395	0	0	0
hsa-miR-129-5p	40	89	57	78	54	64	71	70	78	80	6.85242	10.9357	8.21792	13.2213	7.83109	10.7509	10.7902	8.51259	10.1497	9.24092
hsa-miR-1296-5p	26	36	74	35	69	8	27	32	23	40	4.45407	4.42344	10.6689	5.93265	10.0064	1.34386	4.10332	3.89147	2.99285	4.62046
hsa-miR-1298-5p	18	15	10	15	6	9	11	12	10	15	3.08359	1.8431	1.44174	2.54257	0.870121	1.51184	1.67172	1.4593	1.30124	1.73267
hsa-miR-1299	0	3	0	4	2	5	8	5	2	1	0	0.36862	0	0.678018	0.29004	0.839912	1.2158	0.608042	0.260248	0.115511
hsa-miR-1301-3p	126	168	142	133	184	154	79	134	163	223	21.5851	20.6427	20.4727	22.5441	26.6837	25.8693	12.006	16.2955	21.2102	25.7591
hsa-miR-1302	1	0	0	0	0	0	0	0	0	0	0.17131	0	0	0	0	0	0	0	0	0
hsa-miR-1303	11	41	39	23	55	22	17	41	39	60	1.88442	5.0378	5.62279	3.8986	7.97611	3.69561	2.58357	4.98595	5.07484	6.93069
hsa-miR-1304-5p	6	8	11	2	5	3	9	6	10	24	1.02786	0.982986	1.58591	0.339009	0.725101	0.503947	1.36777	0.729651	1.30124	2.77228
hsa-miR-1305	0	0	0	0	1	0	1	1	0	1	0	0	0	0	0.14502	0	0.151975	0.121608	0	0.115511
hsa-miR-1306-3p	13	19	23	42	10	29	20	20	32	28	2.22704	2.33459	3.316	7.11918	1.4502	4.87149	3.0395	2.43217	4.16397	3.23432
hsa-miR-1306-5p	14	17	25	21	32	11	12	14	25	22	2.39835	2.08885	3.60435	3.55959	4.64065	1.84781	1.8237	1.70252	3.2531	2.54125
hsa-miR-1307-3p	1984	4637	3497	3725	4972	1600	2236	2693	2925	3973	339.88	569.763	504.177	631.404	721.04	268.772	339.816	327.492	380.613	458.927
hsa-miR-1307-5p	8	6	34	12	16	4	13	20	10	10	1.37048	0.737239	4.90192	2.03405	2.32032	0.67193	1.97567	2.43217	1.30124	1.15511
hsa-miR-130a-3p	76	109	85	79	163	48	78	122	59	89	13.0196	13.3932	12.2548	13.3908	23.6383	8.06315	11.854	14.8362	7.67732	10.2805
hsa-miR-130a-5p	19	12	22	10	18	12	25	23	24	23	3.2549	1.47448	3.17183	1.69504	2.61036	2.01579	3.79937	2.797	3.12298	2.65676
hsa-miR-130b-3p	13	18	23	6	30	4	17	14	11	18	2.22704	2.21172	3.316	1.01703	4.35061	0.67193	2.58357	1.70252	1.43136	2.07921
hsa-miR-130b-5p	810	1524	1042	1839	971	1149	1236	1176	1994	2114	138.762	187.259	150.229	311.719	140.815	193.012	187.841	143.012	259.467	244.191
hsa-miR-1322	0	1	0	0	0	0	0	0	0	0	0	0.122873	0	0	0	0	0	0	0	0
hsa-miR-132-3p	83	93	163	59	116	63	114	166	93	110	14.2188	11.4272	23.5004	10.0008	16.8223	10.5829	17.3251	20.187	12.1015	12.7063
hsa-miR-132-5p	157	262	222	203	277	187	256	240	267	292	26.8957	32.1928	32.0066	34.4094	40.1706	31.4127	38.9056	29.186	34.7431	33.7293
hsa-miR-133a-3p	5	4	3	18	8	9	4	7	8	5	0.856552	0.491493	0.432522	3.05108	1.16016	1.51184	0.607899	0.851259	1.04099	0.577557
hsa-miR-133a-5p	0	0	0	1	0	0	0	0	0	2	0	0	0	0.169504	0	0	0	0	0	0.231023
hsa-miR-133b	0	1	0	3	1	0	0	0	0	0	0	0.122873	0	0.508513	0.14502	0	0	0	0	0
hsa-miR-1343-3p	3	24	8	10	9	11	4	10	13	9	0.513931	2.94896	1.15339	1.69504	1.30518	1.84781	0.607899	1.21608	1.69161	1.0396
hsa-miR-1343-5p	2	0	2	0	0	1	0	0	0	0	0.342621	0	0.288348	0	0	0.167982	0	0	0	0
hsa-miR-134-5p	4	7	14	9	7	3	5	3	8	9	0.685242	0.860113	2.01844	1.52554	1.01514	0.503947	0.759874	0.364825	1.04099	1.0396
hsa-miR-135a-2-3p	1	0	0	6	0	3	0	0	0	2	0.17131	0	0	1.01703	0	0.503947	0	0	0	0.231023
hsa-miR-135a-3p	3	0	0	0	0	0	0	0	0	0	0.513931	0	0	0	0	0	0	0	0	0
hsa-miR-135a-5p	0	2	5	1	0	4	1	4	5	1	0	0.245746	0.72087	0.169504	0	0.67193	0.151975	0.486434	0.65062	0.115511
hsa-miR-135b-3p	16	23	35	15	19	8	9	12	11	11	2.74097	2.82608	5.04609	2.54257	2.75538	1.34386	1.36777	1.4593	1.43136	1.27063
hsa-miR-135b-5p	1120	1524	1664	1090	2389	803	1245	1875	1253	1898	191.868	187.259	239.906	184.76	346.453	134.89	189.209	228.016	163.045	219.241
hsa-miR-136-3p	2	0	2	7	2	2	2	1	0	1	0.342621	0	0.288348	1.18653	0.29004	0.335965	0.30395	0.121608	0	0.115511
hsa-miR-136-5p	0	0	1	0	0	0	3	1	0	0	0	0	0.144174	0	0	0	0.455924	0.121608	0	0
hsa-miR-137-3p	14	23	13	5	19	11	12	36	4	26	2.39835	2.82608	1.87426	0.847522	2.75538	1.84781	1.8237	4.37791	0.520496	3.0033
hsa-miR-137-5p	2	1	0	2	3	1	1	6	2	1	0.342621	0.122873	0	0.339009	0.435061	0.167982	0.151975	0.729651	0.260248	0.115511
hsa-miR-138-1-3p	2	13	9	8	7	9	4	1	6	21	0.342621	1.59735	1.29757	1.35604	1.01514	1.51184	0.607899	0.121608	0.780744	2.42574
hsa-miR-138-5p	67	39	68	23	102	22	60	50	30	48	11.4778	4.79206	9.80384	3.8986	14.7921	3.69561	9.11849	6.08042	3.90372	5.54455
hsa-miR-139-3p	4	1	2	3	3	7	5	2	3	6	0.685242	0.122873	0.288348	0.508513	0.435061	1.17588	0.759874	0.243217	0.390372	0.693069
hsa-miR-139-5p	195	272	390	177	288	223	325	388	361	342	33.4055	33.4215	56.2279	30.0023	41.7658	37.4601	49.3918	47.1841	46.9748	39.5049
hsa-miR-1-3p	673	748	880	1671	731	484	552	980	544	825	115.292	91.9092	126.873	283.242	106.01	81.3035	83.8901	119.176	70.7875	95.297
hsa-miR-140-3p	4435	3097	2510	3241	1832	2920	8033	2664	3583	4207	759.762	380.538	361.877	549.364	265.677	490.509	1220.81	323.965	466.234	485.957
hsa-miR-140-5p	154	267	286	218	413	78	152	218	180	374	26.3818	32.8072	41.2338	36.952	59.8933	13.1026	23.1002	26.5107	23.4223	43.2013
hsa-miR-141-3p	18	20	27	35	39	10	26	38	24	24	3.08359	2.45746	3.8927	5.93265	5.65579	1.67982	3.95134	4.62112	3.12298	2.77228
hsa-miR-141-5p	19	21	33	28	47	23	59	42	44	57	3.2549	2.58034	4.75774	4.74612	6.81595	3.86359	8.96651	5.10756	5.72546	6.58415
hsa-miR-142-3p	29	48	56	60	78	19	29	74	37	65	4.968	5.89792	8.07375	10.1703	11.3116	3.19167	4.40727	8.99903	4.81459	7.50825
hsa-miR-142-5p	41	44	56	41	46	16	23	55	34	74	7.02373	5.40642	8.07375	6.94968	6.67093	2.68772	3.49542	6.68847	4.42422	8.54785
hsa-miR-143-3p	6673	11524	10462	13875	7826	10343	13051	10381	14152	12213	1143.15	1415.99	1508.35	2351.87	1134.93	1737.44	1983.42	1262.42	1841.52	1410.74
hsa-miR-143-5p	8	15	15	16	9	6	13	12	8	11	1.37048	1.8431	2.16261	2.71207	1.30518	1.00789	1.97567	1.4593	1.04099	1.27063
hsa-miR-144-3p	0	0	0	0	0	2	0	1	0	4	0	0	0	0	0	0.335965	0	0.121608	0	0.462046
hsa-miR-144-5p	3	3	0	3	1	0	1	3	0	3	0.513931	0.36862	0	0.508513	0.14502	0	0.151975	0.364825	0	0.346534
hsa-miR-145-3p	12	9	13	26	22	16	20	15	16	26	2.05573	1.10586	1.87426	4.40711	3.19044	2.68772	3.0395	1.82413	2.08198	3.0033
hsa-miR-145-5p	133	193	112	125	100	141	163	145	224	171	22.7843	23.7145	16.1475	21.188	14.502	23.6855	24.7719	17.6332	29.1478	19.7525
hsa-miR-1468-5p	13	33	23	26	13	14	12	7	25	15	2.22704	4.05482	3.316	4.40711	1.88526	2.35175	1.8237	0.851259	3.2531	1.73267
hsa-miR-146a-3p	271	459	511	343	673	171	263	347	308	461	46.4251	56.3988	73.673	58.14	97.5986	28.725	39.9694	42.1981	40.0782	53.2508
hsa-miR-146a-5p	161666	193488	219903	77570	245810	83654	113609	179378	94755	150644	27695.1	23774.5	31704.3	13148.5	35647.4	14052.4	17265.7	21813.9	12329.9	17401.1
hsa-miR-146b-3p	5	16	38	11	6	14	20	7	20	11	0.856552	1.96597	5.47862	1.86455	0.870121	2.35175	3.0395	0.851259	2.60248	1.27063
hsa-miR-146b-5p	1179	1861	1383	1083	1655	1207	1144	1708	1481	1975	201.975	228.667	199.393	183.573	240.008	202.755	173.859	207.707	192.714	228.135
hsa-miR-147a	1	0	0	0	0	0	0	0	0	1	0.17131	0	0	0	0	0	0	0	0	0.115511
hsa-miR-147b-3p	23	48	47	70	28	30	48	89	49	56	3.94014	5.89792	6.77618	11.8653	4.06057	5.03947	7.29479	10.8232	6.37608	6.46864
hsa-miR-147b-5p	7	17	8	0	6	3	6	11	5	8	1.19917	2.08885	1.15339	0	0.870121	0.503947	0.911849	1.33769	0.65062	0.924092
hsa-miR-148a-3p	33048	42738	36122	50756	29925	42684	38392	47704	52202	41081	5661.47	5251.36	5207.86	8603.37	4339.73	7170.16	5834.62	5801.21	6792.74	4745.33
hsa-miR-148a-5p	12	17	15	20	21	7	12	12	18	12	2.05573	2.08885	2.16261	3.39009	3.04542	1.17588	1.8237	1.4593	2.34223	1.38614
hsa-miR-148b-3p	3542	5658	7490	3852	5087	3647	3997	7140	4964	5213	606.782	695.217	1079.86	652.931	737.718	612.632	607.443	868.285	645.936	602.161
hsa-miR-148b-5p	70	135	94	60	130	44	71	123	93	105	11.9917	16.5879	13.5524	10.1703	18.8526	7.39123	10.7902	14.9578	12.1015	12.1287
hsa-miR-149-3p	1	0	1	1	3	1	3	2	0	4	0.17131	0	0.144174	0.169504	0.435061	0.167982	0.455924	0.243217	0	0.462046
hsa-miR-149-5p	834	1341	1546	892	1603	1113	1431	1715	1640	1522	142.873	164.773	222.893	151.198	232.467	186.964	217.476	208.559	213.403	175.808
hsa-miR-150-3p	1	0	0	0	0	0	0	0	0	0	0.17131	0	0	0	0	0	0	0	0	0
hsa-miR-150-5p	5	8	5	4	6	5	7	3	8	8	0.856552	0.982986	0.72087	0.678018	0.870121	0.839912	1.06382	0.364825	1.04099	0.924092
hsa-miR-151a-3p	312656	478566	355106	530144	243971	501304	575395	420225	653882	457781	53561.3	58803	51197.1	89861.7	35380.7	84210.2	87445.5	51102.9	85085.8	52879
hsa-miR-151a-5p	429	584	749	580	772	361	601	573	530	529	73.4922	71.758	107.986	98.3125	111.956	60.6416	91.3369	69.6817	68.9658	61.1056
hsa-miR-151b	20	15	37	24	19	8	24	21	11	15	3.42621	1.8431	5.33444	4.06811	2.75538	1.34386	3.6474	2.55378	1.43136	1.73267
hsa-miR-152-3p	4010	5556	6005	4094	4294	3601	5223	5602	4361	5291	686.955	682.684	865.765	693.951	622.717	604.905	793.764	681.251	567.471	611.171
hsa-miR-152-5p	24	26	58	43	51	33	42	81	73	64	4.11145	3.1947	8.3621	7.28869	7.39603	5.54342	6.38294	9.85029	9.49906	7.39273
hsa-miR-153-3p	0	0	0	2	1	0	0	2	0	0	0	0	0	0.339009	0.14502	0	0	0.243217	0	0
hsa-miR-1537-3p	0	1	0	0	0	0	0	0	0	0	0	0.122873	0	0	0	0	0	0	0	0
hsa-miR-1538	2	0	0	0	0	0	0	0	0	0	0.342621	0	0	0	0	0	0	0	0	0
hsa-miR-154-3p	0	1	0	3	1	0	0	0	0	0	0	0.122873	0	0.508513	0.14502	0	0	0	0	0
hsa-miR-155-3p	0	0	0	0	0	0	3	0	0	0	0	0	0	0	0	0	0.455924	0	0	0
hsa-miR-155-5p	4778	7078	5303	3589	7245	3537	4596	5238	4653	7518	818.522	869.697	764.555	608.351	1050.67	594.154	698.476	636.985	605.467	868.415
hsa-miR-15a-5p	8	19	26	7	33	7	1	21	14	16	1.37048	2.33459	3.74853	1.18653	4.78567	1.17588	0.151975	2.55378	1.82174	1.84818
hsa-miR-15b-3p	74	68	104	35	76	27	90	111	74	91	12.677	8.35538	14.9941	5.93265	11.0215	4.53552	13.6777	13.4985	9.62918	10.5115
hsa-miR-15b-5p	186	189	368	111	296	170	215	227	168	272	31.8638	23.223	53.0561	18.815	42.926	28.557	32.6746	27.6051	21.8608	31.4191
hsa-miR-16-1-3p	2	1	1	3	17	2	7	11	13	6	0.342621	0.122873	0.144174	0.508513	2.46534	0.335965	1.06382	1.33769	1.69161	0.693069
hsa-miR-16-2-3p	188	316	230	254	357	335	402	436	531	858	32.2064	38.8279	33.16	43.0541	51.7722	56.2741	61.0939	53.0213	69.0959	99.1088
hsa-miR-16-5p	580	659	765	297	841	292	520	647	420	572	99.3601	80.9735	110.293	50.3428	121.962	49.0509	79.0269	78.6807	54.6521	66.0726
hsa-miR-17-3p	6	7	3	4	14	8	4	11	5	5	1.02786	0.860113	0.432522	0.678018	2.03028	1.34386	0.607899	1.33769	0.65062	0.577557
hsa-miR-17-5p	982	1165	1663	397	1599	447	722	1011	648	835	168.227	143.147	239.762	67.2932	231.887	75.0881	109.726	122.946	84.3204	96.4521
hsa-miR-181a-2-3p	1855	2808	2336	3071	2212	2950	2903	3122	3897	3616	317.781	345.028	336.791	520.548	320.785	495.548	441.183	379.662	507.093	417.689
hsa-miR-181a-3p	623	879	768	602	816	436	681	876	789	785	106.726	108.006	110.726	102.042	118.336	73.2403	103.495	106.529	102.668	90.6765
hsa-miR-181a-5p	5875	8278	10134	4930	11987	2776	4391	7077	5172	9340	1006.45	1017.14	1461.06	835.657	1738.36	466.319	667.321	860.623	673.002	1078.88
hsa-miR-181b-2-3p	26	24	29	37	31	19	18	32	40	42	4.45407	2.94896	4.18105	6.27166	4.49563	3.19167	2.73555	3.89147	5.20496	4.85148
hsa-miR-181b-3p	59	54	56	44	42	77	41	91	67	65	10.1073	6.63516	8.07375	7.45819	6.09085	12.9346	6.23097	11.0664	8.71831	7.50825
hsa-miR-181b-5p	3136	3996	4013	2143	5103	1822	2784	3562	2664	5258	537.23	491.002	578.571	363.248	740.038	306.064	423.098	433.169	346.65	607.359
hsa-miR-181c-3p	37	57	70	29	57	28	53	47	31	19	6.33849	7.00378	10.0922	4.91563	8.26615	4.70351	8.05466	5.7156	4.03385	2.19472
hsa-miR-181c-5p	3	5	8	1	2	0	3	1	11	12	0.513931	0.614366	1.15339	0.169504	0.29004	0	0.455924	0.121608	1.43136	1.38614
hsa-miR-181d-3p	0	0	0	2	0	0	0	0	0	0	0	0	0	0.339009	0	0	0	0	0	0
hsa-miR-181d-5p	199	310	247	153	297	131	208	282	184	373	34.0908	38.0907	35.611	25.9342	43.071	22.0057	31.6108	34.2936	23.9428	43.0858
hsa-miR-182-3p	26	26	30	26	19	15	19	27	21	56	4.45407	3.1947	4.32522	4.40711	2.75538	2.51974	2.88752	3.28343	2.73261	6.46864
hsa-miR-182-5p	34920	41445	37681	21424	30578	50089	36012	50552	49005	51068	5982.16	5092.48	5432.62	3631.46	4434.43	8414.07	5472.92	6147.55	6376.73	5898.94
hsa-miR-183-3p	13	5	10	4	10	1	8	7	0	7	2.22704	0.614366	1.44174	0.678018	1.4502	0.167982	1.2158	0.851259	0	0.80858
hsa-miR-183-5p	17699	24252	22350	20351	18281	23185	20812	27367	27367	31628	3032.02	2979.92	3222.29	3449.58	2651.11	3894.67	3162.9	3328.06	3561.11	3653.4
hsa-miR-184	39	34	23	31	13	21	17	23	38	74	6.68111	4.17769	3.316	5.25464	1.88526	3.52763	2.58357	2.797	4.94471	8.54785
hsa-miR-1843	126	167	250	174	176	158	150	219	185	229	21.5851	20.5198	36.0435	29.4938	25.5236	26.5412	22.7962	26.6323	24.073	26.4521
hsa-miR-185-3p	39	60	91	75	71	51	57	105	50	100	6.68111	7.37239	13.1198	12.7128	10.2964	8.5671	8.66256	12.7689	6.5062	11.5511
hsa-miR-185-5p	1331	2103	2024	967	2043	851	1318	1697	1275	1947	228.014	258.402	291.808	163.911	296.276	142.953	200.303	206.37	165.908	224.901
hsa-miR-186-5p	878	1347	1457	943	1792	738	1081	1328	1027	1698	150.411	165.51	210.062	159.843	259.876	123.971	164.285	161.496	133.637	196.138
hsa-miR-187-3p	0	1	6	3	3	0	3	2	1	0	0	0.122873	0.865045	0.508513	0.435061	0	0.455924	0.243217	0.130124	0
hsa-miR-188-5p	1	1	5	0	0	0	0	0	1	0	0.17131	0.122873	0.72087	0	0	0	0	0	0.130124	0
hsa-miR-18a-3p	6	19	15	9	22	25	8	7	32	10	1.02786	2.33459	2.16261	1.52554	3.19044	4.19956	1.2158	0.851259	4.16397	1.15511
hsa-miR-18a-5p	28	33	27	18	47	12	25	30	25	22	4.79669	4.05482	3.8927	3.05108	6.81595	2.01579	3.79937	3.64825	3.2531	2.54125
hsa-miR-1908-3p	1	4	1	0	1	2	1	1	1	5	0.17131	0.491493	0.144174	0	0.14502	0.335965	0.151975	0.121608	0.130124	0.577557
hsa-miR-1908-5p	2	9	3	4	10	1	3	9	10	7	0.342621	1.10586	0.432522	0.678018	1.4502	0.167982	0.455924	1.09448	1.30124	0.80858
hsa-miR-1909-3p	0	0	0	2	0	0	0	0	0	0	0	0	0	0.339009	0	0	0	0	0	0
hsa-miR-190a-5p	21	29	23	10	24	5	11	22	8	10	3.59752	3.56332	3.316	1.69504	3.48048	0.839912	1.67172	2.67539	1.04099	1.15511
hsa-miR-190b-5p	1	4	1	0	4	0	0	5	0	3	0.17131	0.491493	0.144174	0	0.580081	0	0	0.608042	0	0.346534
hsa-miR-1910-5p	0	0	0	1	4	0	1	10	1	0	0	0	0	0.169504	0.580081	0	0.151975	1.21608	0.130124	0
hsa-miR-191-3p	8	14	7	9	18	11	14	9	13	22	1.37048	1.72023	1.00922	1.52554	2.61036	1.84781	2.12765	1.09448	1.69161	2.54125
hsa-miR-1914-3p	0	0	0	0	0	0	0	0	1	0	0	0	0	0	0	0	0	0	0.130124	0
hsa-miR-1914-5p	4	0	0	0	0	0	0	0	2	0	0.685242	0	0	0	0	0	0	0	0.260248	0
hsa-miR-1915-5p	0	0	0	0	0	0	0	0	0	1	0	0	0	0	0	0	0	0	0	0.115511
hsa-miR-191-5p	4603	7512	6456	3901	8592	3551	4708	5682	5148	7794	788.542	923.024	930.788	661.237	1246.01	596.505	715.497	690.979	669.879	900.296
hsa-miR-192-3p	0	0	2	0	0	0	0	0	1	0	0	0	0.288348	0	0	0	0	0	0.130124	0
hsa-miR-192-5p	1269	1866	1734	1539	1442	2456	3674	3940	3520	3887	217.393	229.281	249.998	260.867	209.119	412.565	558.355	479.137	458.037	448.993
hsa-miR-193a-3p	5	2	14	6	7	7	9	15	4	11	0.856552	0.245746	2.01844	1.01703	1.01514	1.17588	1.36777	1.82413	0.520496	1.27063
hsa-miR-193a-5p	546	859	970	644	928	360	569	669	517	730	93.5355	105.548	139.849	109.161	134.579	60.4737	86.4737	81.3561	67.2741	84.3234
hsa-miR-193b-3p	98	195	320	77	325	94	187	264	163	142	16.7884	23.9603	46.1357	13.0518	47.1316	15.7903	28.4193	32.1046	21.2102	16.4026
hsa-miR-193b-5p	34	31	48	38	41	19	31	40	31	42	5.82456	3.80907	6.92036	6.44117	5.94583	3.19167	4.71122	4.86434	4.03385	4.85148
hsa-miR-194-3p	12	5	11	3	11	94	59	72	58	54	2.05573	0.614366	1.58591	0.508513	1.59522	15.7903	8.96651	8.75581	7.5472	6.23762
hsa-miR-194-5p	112	155	181	161	196	104	136	193	116	213	19.1868	19.0454	26.0955	27.2902	28.424	17.4702	20.6686	23.4704	15.0944	24.6039
hsa-miR-195-3p	44	135	66	96	94	105	123	112	180	137	7.53766	16.5879	9.51549	16.2724	13.6319	17.6382	18.6929	13.6202	23.4223	15.8251
hsa-miR-195-5p	22	36	34	18	41	20	23	35	34	22	3.76883	4.42344	4.90192	3.05108	5.94583	3.35965	3.49542	4.2563	4.42422	2.54125
hsa-miR-196a-1-3p	0	4	7	2	2	2	3	0	6	0	0	0.491493	1.00922	0.339009	0.29004	0.335965	0.455924	0	0.780744	0
hsa-miR-196a-3p	0	8	9	5	2	6	4	0	1	2	0	0.982986	1.29757	0.847522	0.29004	1.00789	0.607899	0	0.130124	0.231023
hsa-miR-196a-5p	663	718	981	270	766	424	521	738	422	734	113.579	88.223	141.435	45.7662	111.085	71.2245	79.1789	89.7471	54.9124	84.7854
hsa-miR-196b-3p	5	0	6	0	6	0	1	0	0	0	0.856552	0	0.865045	0	0.870121	0	0.151975	0	0	0
hsa-miR-196b-5p	1721	2681	2848	1484	3412	1079	1704	2192	1589	2876	294.825	329.423	410.608	251.545	494.809	181.253	258.965	266.566	206.767	332.211
hsa-miR-1972	1	0	0	0	0	0	0	0	1	0	0.17131	0	0	0	0	0	0	0	0.130124	0
hsa-miR-1973	0	0	1	0	0	0	0	0	0	0	0	0	0.144174	0	0	0	0	0	0	0
hsa-miR-197-3p	705	907	1458	636	1381	552	954	973	718	883	120.774	111.446	210.206	107.805	200.273	92.7263	144.984	118.325	93.4291	101.997
hsa-miR-197-5p	1	0	3	0	0	2	0	2	3	6	0.17131	0	0.432522	0	0	0.335965	0	0.243217	0.390372	0.693069
hsa-miR-1976	0	0	1	0	0	0	1	0	0	0	0	0	0.144174	0	0	0	0.151975	0	0	0
hsa-miR-199a-3p	94	106	62	141	54	60	74	69	86	100	16.1032	13.0246	8.93879	23.9001	7.83109	10.0789	11.2461	8.39099	11.1907	11.5511
hsa-miR-199a-5p	116	75	74	90	61	46	70	74	68	156	19.872	9.21549	10.6689	15.2554	8.84623	7.72719	10.6382	8.99903	8.84844	18.0198
hsa-miR-199b-5p	17	20	8	3	13	16	14	12	23	24	2.91228	2.45746	1.15339	0.508513	1.88526	2.68772	2.12765	1.4593	2.99285	2.77228
hsa-miR-19a-3p	34	49	37	14	47	22	27	58	23	78	5.82456	6.02079	5.33444	2.37306	6.81595	3.69561	4.10332	7.05329	2.99285	9.00989
hsa-miR-19b-1-5p	2	1	3	1	3	3	0	8	2	10	0.342621	0.122873	0.432522	0.169504	0.435061	0.503947	0	0.972868	0.260248	1.15511
hsa-miR-19b-3p	88	144	115	42	222	75	92	155	104	168	15.0753	17.6937	16.58	7.11918	32.1945	12.5987	13.9817	18.8493	13.5329	19.4059
hsa-miR-200a-3p	3528	5655	5982	3690	7457	2694	3801	5765	4179	5686	604.383	694.848	862.449	625.471	1081.42	452.545	577.656	701.073	543.788	656.798
hsa-miR-200a-5p	21086	32530	28013	36383	23356	32369	37092	35582	46072	31786	3612.25	3997.07	4038.75	6167.08	3387.09	5437.42	5637.05	4327.07	5995.08	3671.65
hsa-miR-200b-3p	50983	63676	57824	42457	52777	39675	49109	55765	52585	58316	8733.92	7824.08	8336.72	7196.65	7653.73	6664.7	7463.33	6781.5	6842.57	6736.17
hsa-miR-200b-5p	567	761	903	794	807	550	671	656	723	955	97.1331	93.5065	130.189	134.586	117.031	92.3903	101.975	79.7752	94.0797	110.313
hsa-miR-200c-3p	3984	5170	5224	3499	6861	2561	4332	4396	4215	7121	682.501	635.255	753.165	593.096	994.983	430.203	658.355	534.591	548.473	822.557
hsa-miR-200c-5p	0	0	0	0	1	0	0	1	1	0	0	0	0	0	0.14502	0	0	0.121608	0.130124	0
hsa-miR-203a-3p	6	13	6	8	13	6	14	19	13	7	1.02786	1.59735	0.865045	1.35604	1.88526	1.00789	2.12765	2.31056	1.69161	0.80858
hsa-miR-203a-5p	0	0	0	0	1	0	3	0	0	1	0	0	0	0	0.14502	0	0.455924	0	0	0.115511
hsa-miR-203b-3p	0	0	0	0	1	0	3	0	0	1	0	0	0	0	0.14502	0	0.455924	0	0	0.115511
hsa-miR-203b-5p	6	13	6	8	13	6	14	19	13	7	1.02786	1.59735	0.865045	1.35604	1.88526	1.00789	2.12765	2.31056	1.69161	0.80858
hsa-miR-204-3p	22	35	28	61	44	20	16	30	46	34	3.76883	4.30056	4.03687	10.3398	6.38089	3.35965	2.4316	3.64825	5.98571	3.92739
hsa-miR-204-5p	941	1414	1165	1228	1235	804	1088	1206	1739	2035	161.203	173.743	167.963	208.151	179.1	135.058	165.349	146.66	226.286	235.066
hsa-miR-205-5p	23	16	22	23	10	9	14	29	14	70	3.94014	1.96597	3.17183	3.8986	1.4502	1.51184	2.12765	3.52665	1.82174	8.0858
hsa-miR-206	46	8	18	308	3	9	17	61	11	16	7.88028	0.982986	2.59513	52.2074	0.435061	1.51184	2.58357	7.41812	1.43136	1.84818
hsa-miR-20a-3p	1	0	11	1	1	0	2	0	0	12	0.17131	0	1.58591	0.169504	0.14502	0	0.30395	0	0	1.38614
hsa-miR-20a-5p	3878	4420	5041	1364	5359	1545	2305	3539	2005	3436	664.342	543.1	726.782	231.204	777.163	259.533	350.302	430.372	260.899	396.897
hsa-miR-20b-5p	3	0	1	0	0	0	2	1	2	1	0.513931	0	0.144174	0	0	0	0.30395	0.121608	0.260248	0.115511
hsa-miR-210-3p	455	490	807	457	706	269	452	519	441	624	77.9463	60.2079	116.348	77.4635	102.384	45.1873	68.6926	63.1148	57.3847	72.0792
hsa-miR-210-5p	112	93	136	71	139	42	125	77	60	101	19.1868	11.4272	19.6077	12.0348	20.1578	7.05526	18.9969	9.36385	7.80744	11.6667
hsa-miR-2110	52	82	85	52	58	47	45	88	53	70	8.90815	10.0756	12.2548	8.81423	8.41117	7.89517	6.83887	10.7015	6.89658	8.0858
hsa-miR-2113	0	0	3	0	0	1	2	0	0	2	0	0	0.432522	0	0	0.167982	0.30395	0	0	0.231023
hsa-miR-2115-3p	0	0	0	0	0	0	3	0	0	0	0	0	0	0	0	0	0.455924	0	0	0
hsa-miR-2115-5p	1	0	0	0	1	0	0	0	0	0	0.17131	0	0	0	0.14502	0	0	0	0	0
hsa-miR-2116-3p	10	28	16	13	19	17	22	19	14	22	1.7131	3.44045	2.30679	2.20356	2.75538	2.8557	3.34345	2.31056	1.82174	2.54125
hsa-miR-2116-5p	0	0	0	0	0	3	0	2	3	0	0	0	0	0	0	0.503947	0	0.243217	0.390372	0
hsa-miR-2117	0	0	0	0	0	0	0	0	1	0	0	0	0	0	0	0	0	0	0.130124	0
hsa-miR-212-3p	1	0	2	1	0	0	0	8	0	1	0.17131	0	0.288348	0.169504	0	0	0	0.972868	0	0.115511
hsa-miR-212-5p	12	29	13	31	18	15	16	13	21	37	2.05573	3.56332	1.87426	5.25464	2.61036	2.51974	2.4316	1.58091	2.73261	4.27392
hsa-miR-21-3p	502	488	892	628	902	462	408	903	576	699	85.9979	59.9621	128.603	106.449	130.808	77.6079	62.0057	109.812	74.9515	80.7425
hsa-miR-214-3p	9	8	4	13	8	11	5	9	12	15	1.54179	0.982986	0.576696	2.20356	1.16016	1.84781	0.759874	1.09448	1.56149	1.73267
hsa-miR-214-5p	7	6	6	5	8	1	6	5	7	6	1.19917	0.737239	0.865045	0.847522	1.16016	0.167982	0.911849	0.608042	0.910868	0.693069
hsa-miR-215-3p	2	0	0	0	0	0	0	0	0	0	0.342621	0	0	0	0	0	0	0	0	0
hsa-miR-215-5p	29	20	24	30	7	36	30	37	25	36	4.968	2.45746	3.46018	5.08513	1.01514	6.04737	4.55924	4.49951	3.2531	4.15841
hsa-miR-21-5p	2574065	3640422	2941205	2691503	3109546	2633435	2917884	3888892	3538042	4052044	440964	447310	424046	456222	450947	442371	443445	472922	460384	468058
hsa-miR-216a-3p	20	24	17	16	18	15	22	15	16	29	3.42621	2.94896	2.45096	2.71207	2.61036	2.51974	3.34345	1.82413	2.08198	3.34983
hsa-miR-216a-5p	3	4	6	1	3	5	2	2	3	4	0.513931	0.491493	0.865045	0.169504	0.435061	0.839912	0.30395	0.243217	0.390372	0.462046
hsa-miR-216b-5p	12	8	2	6	3	2	3	7	14	10	2.05573	0.982986	0.288348	1.01703	0.435061	0.335965	0.455924	0.851259	1.82174	1.15511
hsa-miR-217-3p	0	0	0	0	1	0	0	1	0	0	0	0	0	0	0.14502	0	0	0.121608	0	0
hsa-miR-217-5p	18	24	31	13	36	12	30	19	13	15	3.08359	2.94896	4.4694	2.20356	5.22073	2.01579	4.55924	2.31056	1.69161	1.73267
hsa-miR-218-1-3p	0	0	0	0	0	0	0	0	0	1	0	0	0	0	0	0	0	0	0	0.115511
hsa-miR-218-5p	1824	2458	2834	2223	2945	1290	1771	2372	2044	2627	312.47	302.022	408.589	376.808	427.084	216.697	269.147	288.455	265.974	303.449
hsa-miR-219a-1-3p	26	29	15	26	32	29	34	30	20	28	4.45407	3.56332	2.16261	4.40711	4.64065	4.87149	5.16714	3.64825	2.60248	3.23432
hsa-miR-219a-2-3p	3	3	3	3	3	0	2	1	0	4	0.513931	0.36862	0.432522	0.508513	0.435061	0	0.30395	0.121608	0	0.462046
hsa-miR-219a-5p	0	0	0	0	3	0	0	0	1	2	0	0	0	0	0.435061	0	0	0	0.130124	0.231023
hsa-miR-219b-3p	0	0	3	0	0	0	0	0	0	0	0	0	0.432522	0	0	0	0	0	0	0
hsa-miR-219b-5p	3	3	3	3	3	0	2	1	0	4	0.513931	0.36862	0.432522	0.508513	0.435061	0	0.30395	0.121608	0	0.462046
hsa-miR-221-3p	38699	52623	62631	27021	58071	25179	32729	45694	36034	48309	6629.54	6465.96	9029.77	4580.18	8421.47	4229.63	4973.98	5556.78	4688.89	5580.24
hsa-miR-221-5p	3501	5703	4461	1710	4905	4086	3129	4484	4315	3658	599.758	700.746	643.161	289.853	711.324	686.376	475.529	545.292	561.485	422.541
hsa-miR-222-3p	62422	108934	59441	58628	64656	93282	65334	82367	111912	103230	10693.5	13385.1	8569.85	9937.7	9376.42	15669.7	9929.12	10016.5	14562.4	11924.2
hsa-miR-222-5p	18	27	25	63	58	32	70	29	40	59	3.08359	3.31758	3.60435	10.6788	8.41117	5.37544	10.6382	3.52665	5.20496	6.81518
hsa-miR-223-3p	1	4	1	5	5	1	1	4	2	1	0.17131	0.491493	0.144174	0.847522	0.725101	0.167982	0.151975	0.486434	0.260248	0.115511
hsa-miR-223-5p	0	0	1	0	0	1	0	0	0	0	0	0	0.144174	0	0	0.167982	0	0	0	0
hsa-miR-22-3p	2266	4482	4300	3624	6014	1783	2723	3996	3388	5166	388.19	550.718	619.949	614.284	872.151	299.513	413.827	485.948	440.86	596.732
hsa-miR-224-3p	14	24	28	20	38	11	13	15	16	23	2.39835	2.94896	4.03687	3.39009	5.51077	1.84781	1.97567	1.82413	2.08198	2.65676
hsa-miR-224-5p	10793	16862	9571	10056	10231	14883	14855	12755	16363	18931	1848.95	2071.89	1379.89	1704.54	1483.7	2500.08	2257.59	1551.12	2129.22	2186.75
hsa-miR-22-5p	502	951	834	918	1222	504	795	939	890	1290	85.9979	116.852	120.241	155.605	177.215	84.6631	120.82	114.19	115.81	149.01
hsa-miR-2276-3p	5	6	6	1	1	4	1	7	5	5	0.856552	0.737239	0.865045	0.169504	0.14502	0.67193	0.151975	0.851259	0.65062	0.577557
hsa-miR-2276-5p	0	2	1	0	0	0	0	0	4	3	0	0.245746	0.144174	0	0	0	0	0	0.520496	0.346534
hsa-miR-2277-3p	0	3	0	3	0	1	1	0	1	3	0	0.36862	0	0.508513	0	0.167982	0.151975	0	0.130124	0.346534
hsa-miR-2277-5p	33	38	56	42	45	17	27	32	25	43	5.65325	4.66918	8.07375	7.11918	6.52591	2.8557	4.10332	3.89147	3.2531	4.96699
hsa-miR-2278	4	0	0	1	3	0	0	2	0	1	0.685242	0	0	0.169504	0.435061	0	0	0.243217	0	0.115511
hsa-miR-2355-3p	19	72	44	35	42	18	41	32	32	49	3.2549	8.84687	6.34366	5.93265	6.09085	3.02368	6.23097	3.89147	4.16397	5.66006
hsa-miR-2355-5p	2	2	0	0	0	2	0	4	1	0	0.342621	0.245746	0	0	0	0.335965	0	0.486434	0.130124	0
hsa-miR-23a-3p	2619	2952	4202	1370	3931	1969	2384	3637	2624	2902	448.662	362.722	605.82	232.221	570.074	330.757	362.308	442.29	341.446	335.214
hsa-miR-23a-5p	31	38	41	28	55	22	41	44	41	58	5.31063	4.66918	5.91114	4.74612	7.97611	3.69561	6.23097	5.35077	5.33509	6.69967
hsa-miR-23b-3p	1663	1670	2207	819	2438	1059	1290	1915	1535	1744	284.889	205.198	318.192	138.824	353.559	177.893	196.048	232.88	199.74	201.452
hsa-miR-23b-5p	80	128	111	119	133	79	86	104	126	135	13.7048	15.7278	16.0033	20.171	19.2877	13.2706	13.0698	12.6473	16.3956	15.594
hsa-miR-23c	0	0	0	0	0	0	1	0	0	0	0	0	0	0	0	0	0.151975	0	0	0
hsa-miR-24-1-5p	124	180	228	182	232	115	203	217	210	290	21.2425	22.1172	32.8717	30.8498	33.6447	19.318	30.8509	26.389	27.3261	33.4983
hsa-miR-24-2-5p	1907	2864	2614	2136	3049	1635	2287	2736	2713	3339	326.689	351.909	376.871	362.061	442.167	274.651	347.566	332.721	353.027	385.693
hsa-miR-24-3p	33394	59868	58117	47625	60535	24755	42444	45657	42820	55254	5720.74	7356.18	8378.97	8072.65	8778.8	4158.4	6450.42	5552.28	5571.91	6382.47
hsa-miR-2467-3p	0	0	2	0	0	0	0	0	0	0	0	0	0.288348	0	0	0	0	0	0	0
hsa-miR-25-3p	11159	17096	16703	14511	13715	15187	16866	18020	19888	18467	1911.65	2100.64	2408.14	2459.68	1988.95	2551.15	2563.21	2191.39	2587.91	2133.15
hsa-miR-25-5p	34	61	62	45	56	43	59	57	76	96	5.82456	7.49527	8.93879	7.6277	8.12113	7.22324	8.96651	6.93168	9.88943	11.0891
hsa-miR-2681-5p	0	0	0	0	0	0	0	2	0	0	0	0	0	0	0	0	0	0.243217	0	0
hsa-miR-2682-3p	2	0	2	0	2	1	1	2	2	2	0.342621	0	0.288348	0	0.29004	0.167982	0.151975	0.243217	0.260248	0.231023
hsa-miR-2682-5p	731	1141	952	1088	651	1251	1283	1231	1620	1267	125.228	140.198	137.254	184.421	94.4081	210.146	194.984	149.7	210.801	146.353
hsa-miR-26a-1-3p	8	29	7	14	12	4	5	10	25	20	1.37048	3.56332	1.00922	2.37306	1.74024	0.67193	0.759874	1.21608	3.2531	2.31023
hsa-miR-26a-2-3p	30	26	29	27	28	23	25	44	30	38	5.13931	3.1947	4.18105	4.57662	4.06057	3.86359	3.79937	5.35077	3.90372	4.38944
hsa-miR-26a-5p	75750	123242	105505	89366	140699	56120	75539	103156	90721	155442	12976.8	15143.1	15211.1	15147.9	20404.2	9427.17	11480	12544.6	11805	17955.3
hsa-miR-26b-3p	5	2	3	8	8	0	3	5	4	7	0.856552	0.245746	0.432522	1.35604	1.16016	0	0.455924	0.608042	0.520496	0.80858
hsa-miR-26b-5p	6451	7803	9557	4329	11007	4069	5561	8874	4650	7719	1105.12	958.78	1377.87	733.785	1596.24	683.52	845.132	1079.15	605.077	891.633
hsa-miR-27a-3p	7071	10987	14472	14560	14829	5336	9676	12659	10113	17339	1211.34	1350.01	2086.49	2467.98	2150.5	896.354	1470.51	1539.44	1315.94	2002.85
hsa-miR-27a-5p	1705	3370	2675	4213	3542	3589	3470	4518	4396	4290	292.084	414.083	385.666	714.122	513.661	602.889	527.353	549.427	572.025	495.544
hsa-miR-27b-3p	48482	42991	52756	41612	48099	22724	39088	45758	31313	50602	8305.48	5282.44	7606.05	7053.42	6975.33	3817.23	5940.39	5564.56	4074.57	5845.11
hsa-miR-27b-5p	744	1085	980	570	852	604	655	661	856	765	127.455	133.317	141.291	96.6175	123.557	101.461	99.5435	80.3832	111.386	88.3663
hsa-miR-28-3p	6337	9507	8221	6989	6851	5466	6581	7413	7280	7977	1085.59	1168.16	1185.26	1184.67	993.533	918.192	1000.15	901.484	947.303	921.435
hsa-miR-28-5p	895	1406	1407	1330	1484	742	940	1116	1080	1396	153.323	172.76	202.853	225.441	215.21	124.643	142.856	135.715	140.534	161.254
hsa-miR-296-3p	33	67	70	49	107	17	37	65	35	63	5.65325	8.23251	10.0922	8.30572	15.5172	2.8557	5.62307	7.90455	4.55434	7.27722
hsa-miR-299-5p	0	0	0	4	1	0	0	0	0	0	0	0	0	0.678018	0.14502	0	0	0	0	0
hsa-miR-29a-3p	5976	8093	7974	4594	9602	3848	6419	7967	6746	9811	1023.75	994.413	1149.64	778.703	1392.48	646.396	975.526	968.855	877.817	1133.28
hsa-miR-29a-5p	26	38	54	29	29	30	32	49	22	19	4.45407	4.66918	7.7854	4.91563	4.20559	5.03947	4.86319	5.95882	2.86273	2.19472
hsa-miR-29b-1-5p	23	34	19	4	31	10	27	24	9	29	3.94014	4.17769	2.73931	0.678018	4.49563	1.67982	4.10332	2.9186	1.17112	3.34983
hsa-miR-29b-2-5p	1	0	4	0	4	6	1	2	2	2	0.17131	0	0.576696	0	0.580081	1.00789	0.151975	0.243217	0.260248	0.231023
hsa-miR-29b-3p	100	96	123	102	197	64	131	198	85	100	17.131	11.7958	17.7334	17.2894	28.569	10.7509	19.9087	24.0785	11.0605	11.5511
hsa-miR-29c-3p	13	19	3	14	22	5	18	19	8	9	2.22704	2.33459	0.432522	2.37306	3.19044	0.839912	2.73555	2.31056	1.04099	1.0396
hsa-miR-29c-5p	242	313	461	213	394	335	443	409	460	400	41.4571	38.4593	66.4643	36.1044	57.138	56.2741	67.3248	49.7379	59.8571	46.2046
hsa-miR-301a-3p	0	3	12	0	5	2	1	7	11	1	0	0.36862	1.73009	0	0.725101	0.335965	0.151975	0.851259	1.43136	0.115511
hsa-miR-301a-5p	31	32	36	41	56	33	29	78	38	88	5.31063	3.93194	5.19027	6.94968	8.12113	5.54342	4.40727	9.48546	4.94471	10.165
hsa-miR-301b-3p	8	13	12	12	23	5	10	7	8	18	1.37048	1.59735	1.73009	2.03405	3.33546	0.839912	1.51975	0.851259	1.04099	2.07921
hsa-miR-301b-5p	0	5	0	3	6	1	2	0	1	4	0	0.614366	0	0.508513	0.870121	0.167982	0.30395	0	0.130124	0.462046
hsa-miR-302a-3p	0	0	0	0	1	0	0	1	0	0	0	0	0	0	0.14502	0	0	0.121608	0	0
hsa-miR-302a-5p	0	0	3	0	1	0	0	0	0	0	0	0	0.432522	0	0.14502	0	0	0	0	0
hsa-miR-302c-3p	0	0	4	0	0	0	0	0	0	0	0	0	0.576696	0	0	0	0	0	0	0
hsa-miR-302d-3p	0	0	0	0	0	0	0	0	2	0	0	0	0	0	0	0	0	0	0.260248	0
hsa-miR-3059-5p	0	0	2	1	1	0	2	1	0	0	0	0	0.288348	0.169504	0.14502	0	0.30395	0.121608	0	0
hsa-miR-3064-3p	0	0	0	0	0	0	0	2	0	0	0	0	0	0	0	0	0	0.243217	0	0
hsa-miR-3064-5p	7	1	1	9	4	2	4	3	1	10	1.19917	0.122873	0.144174	1.52554	0.580081	0.335965	0.607899	0.364825	0.130124	1.15511
hsa-miR-3065-3p	0	1	0	0	0	0	0	0	0	0	0	0.122873	0	0	0	0	0	0	0	0
hsa-miR-3065-5p	1	0	1	1	1	1	1	3	3	3	0.17131	0	0.144174	0.169504	0.14502	0.167982	0.151975	0.364825	0.390372	0.346534
hsa-miR-3074-3p	49	89	111	122	103	59	116	75	86	143	8.39421	10.9357	16.0033	20.6795	14.9371	9.91096	17.6291	9.12064	11.1907	16.5181
hsa-miR-3074-5p	33360	59815	58062	47587	60476	24732	42404	45614	42791	55193	5714.92	7349.66	8371.04	8066.21	8770.24	4154.54	6444.34	5547.05	5568.14	6375.42
hsa-miR-3085-5p	1	0	0	0	0	0	2	0	0	0	0.17131	0	0	0	0	0	0.30395	0	0	0
hsa-miR-30a-3p	15455	25908	19486	25511	17021	23761	26158	28590	29108	27721	2647.6	3183.4	2809.38	4324.23	2468.39	3991.43	3975.36	3476.79	3787.65	3202.09
hsa-miR-30a-5p	143780	180973	180393	115447	166803	156549	158911	242925	207507	207818	24631	22236.7	26008	19568.8	24189.8	26297.5	24150.5	29541.7	27001.7	24005.4
hsa-miR-30b-3p	13	24	18	15	36	5	11	15	16	15	2.22704	2.94896	2.59513	2.54257	5.22073	0.839912	1.67172	1.82413	2.08198	1.73267
hsa-miR-30b-5p	488	348	512	236	612	283	711	599	320	371	83.5995	42.7599	73.8171	40.003	88.7524	47.539	108.054	72.8435	41.6397	42.8548
hsa-miR-30c-1-3p	29	43	41	22	52	19	40	42	56	56	4.968	5.28355	5.91114	3.7291	7.54105	3.19167	6.07899	5.10756	7.28695	6.46864
hsa-miR-30c-2-3p	1405	1984	1781	1469	1743	1573	1453	2175	2298	2304	240.691	243.781	256.774	249.002	252.77	264.236	220.819	264.498	299.025	266.138
hsa-miR-30c-5p	19396	24816	20789	10959	23101	12699	15492	21251	17497	24078	3322.74	3049.22	2997.24	1857.6	3350.11	2133.21	2354.39	2584.3	2276.78	2781.29
hsa-miR-30d-3p	28	67	63	62	49	37	68	81	102	78	4.79669	8.23251	9.08297	10.5093	7.10599	6.21535	10.3343	9.85029	13.2727	9.00989
hsa-miR-30d-5p	53088	73663	54401	56040	65010	58353	56478	72221	81888	101571	9094.53	9051.21	7843.21	9499.03	9427.76	9802.28	8583.23	8782.69	10655.6	11732.6
hsa-miR-30e-3p	4438	7526	6455	7674	5034	7892	8251	9429	10225	8755	760.276	924.744	930.644	1300.78	730.032	1325.72	1253.94	1146.65	1330.52	1011.3
hsa-miR-30e-5p	4455	6869	6080	3492	7727	3668	4338	7491	5971	8897	763.188	844.016	876.578	591.909	1120.57	616.159	659.267	910.969	776.971	1027.71
hsa-miR-3115	0	0	0	2	0	0	1	0	5	0	0	0	0	0.339009	0	0	0.151975	0	0.65062	0
hsa-miR-3116	1	3	0	0	0	4	0	0	0	0	0.17131	0.36862	0	0	0	0.67193	0	0	0	0
hsa-miR-3117-3p	34	31	43	15	40	8	28	20	25	31	5.82456	3.80907	6.19949	2.54257	5.80081	1.34386	4.25529	2.43217	3.2531	3.58086
hsa-miR-3117-5p	0	0	0	0	0	0	0	0	2	0	0	0	0	0	0	0	0	0	0.260248	0
hsa-miR-3120-3p	7	6	6	5	8	1	6	5	7	6	1.19917	0.737239	0.865045	0.847522	1.16016	0.167982	0.911849	0.608042	0.910868	0.693069
hsa-miR-3120-5p	1	1	2	2	2	2	0	2	1	5	0.17131	0.122873	0.288348	0.339009	0.29004	0.335965	0	0.243217	0.130124	0.577557
hsa-miR-3121-3p	3	4	3	4	0	7	4	1	2	4	0.513931	0.491493	0.432522	0.678018	0	1.17588	0.607899	0.121608	0.260248	0.462046
hsa-miR-3124-5p	1	3	3	6	2	1	0	6	2	5	0.17131	0.36862	0.432522	1.01703	0.29004	0.167982	0	0.729651	0.260248	0.577557
hsa-miR-3125	0	0	2	0	0	1	0	0	0	0	0	0	0.288348	0	0	0.167982	0	0	0	0
hsa-miR-3126-3p	0	0	2	0	1	0	0	2	0	0	0	0	0.288348	0	0.14502	0	0	0.243217	0	0
hsa-miR-3126-5p	2	0	1	0	1	0	0	1	1	0	0.342621	0	0.144174	0	0.14502	0	0	0.121608	0.130124	0
hsa-miR-3127-3p	6	6	0	6	2	4	9	1	3	8	1.02786	0.737239	0	1.01703	0.29004	0.67193	1.36777	0.121608	0.390372	0.924092
hsa-miR-3127-5p	5	7	3	1	2	0	3	0	0	0	0.856552	0.860113	0.432522	0.169504	0.29004	0	0.455924	0	0	0
hsa-miR-3128	2	3	6	5	8	4	2	1	2	6	0.342621	0.36862	0.865045	0.847522	1.16016	0.67193	0.30395	0.121608	0.260248	0.693069
hsa-miR-3130-3p	1	0	1	2	2	1	1	4	1	8	0.17131	0	0.144174	0.339009	0.29004	0.167982	0.151975	0.486434	0.130124	0.924092
hsa-miR-3130-5p	1	1	1	3	5	6	2	4	1	9	0.17131	0.122873	0.144174	0.508513	0.725101	1.00789	0.30395	0.486434	0.130124	1.0396
hsa-miR-3132	0	0	0	0	0	1	1	0	0	0	0	0	0	0	0	0.167982	0.151975	0	0	0
hsa-miR-3133	0	0	0	0	2	0	0	0	2	4	0	0	0	0	0.29004	0	0	0	0.260248	0.462046
hsa-miR-3134	0	0	4	0	0	1	0	2	0	0	0	0	0.576696	0	0	0.167982	0	0.243217	0	0
hsa-miR-3135a	0	0	0	0	1	0	0	0	0	0	0	0	0	0	0.14502	0	0	0	0	0
hsa-miR-3136-5p	1	2	3	1	1	0	4	0	0	0	0.17131	0.245746	0.432522	0.169504	0.14502	0	0.607899	0	0	0
hsa-miR-3137	2	0	0	0	0	0	0	0	0	0	0.342621	0	0	0	0	0	0	0	0	0
hsa-miR-3138	0	0	1	0	1	0	0	0	0	2	0	0	0.144174	0	0.14502	0	0	0	0	0.231023
hsa-miR-3139	2	0	0	0	0	0	0	0	1	0	0.342621	0	0	0	0	0	0	0	0.130124	0
hsa-miR-31-3p	64	105	225	74	270	61	163	198	76	70	10.9639	12.9017	32.4392	12.5433	39.1554	10.2469	24.7719	24.0785	9.88943	8.0858
hsa-miR-3140-3p	1	3	0	1	0	0	0	2	3	0	0.17131	0.36862	0	0.169504	0	0	0	0.243217	0.390372	0
hsa-miR-3142	3	5	5	3	5	3	0	2	1	6	0.513931	0.614366	0.72087	0.508513	0.725101	0.503947	0	0.243217	0.130124	0.693069
hsa-miR-3143	0	0	0	1	0	0	0	1	1	0	0	0	0	0.169504	0	0	0	0.121608	0.130124	0
hsa-miR-3145-3p	0	0	1	0	1	0	0	2	0	0	0	0	0.144174	0	0.14502	0	0	0.243217	0	0
hsa-miR-3145-5p	0	0	0	0	0	1	7	0	0	1	0	0	0	0	0	0.167982	1.06382	0	0	0.115511
hsa-miR-3146	0	5	1	3	2	0	0	0	1	0	0	0.614366	0.144174	0.508513	0.29004	0	0	0	0.130124	0
hsa-miR-3148	2	2	3	2	2	3	3	4	8	6	0.342621	0.245746	0.432522	0.339009	0.29004	0.503947	0.455924	0.486434	1.04099	0.693069
hsa-miR-3149	3	2	3	2	4	5	8	2	2	2	0.513931	0.245746	0.432522	0.339009	0.580081	0.839912	1.2158	0.243217	0.260248	0.231023
hsa-miR-3150a-3p	0	0	0	0	0	0	0	0	0	1	0	0	0	0	0	0	0	0	0	0.115511
hsa-miR-3150a-5p	12	18	12	34	4	16	16	20	31	24	2.05573	2.21172	1.73009	5.76315	0.580081	2.68772	2.4316	2.43217	4.03385	2.77228
hsa-miR-3150b-3p	12	14	8	30	4	16	16	19	26	24	2.05573	1.72023	1.15339	5.08513	0.580081	2.68772	2.4316	2.31056	3.38323	2.77228
hsa-miR-3150b-5p	0	0	0	0	0	0	0	0	0	1	0	0	0	0	0	0	0	0	0	0.115511
hsa-miR-3152-3p	0	0	0	1	0	0	0	1	0	3	0	0	0	0.169504	0	0	0	0.121608	0	0.346534
hsa-miR-3152-5p	18	20	31	34	35	8	22	25	18	31	3.08359	2.45746	4.4694	5.76315	5.07571	1.34386	3.34345	3.04021	2.34223	3.58086
hsa-miR-3155b	4	8	2	4	3	0	5	3	2	13	0.685242	0.982986	0.288348	0.678018	0.435061	0	0.759874	0.364825	0.260248	1.50165
hsa-miR-3157-3p	7	19	19	3	7	8	9	5	11	9	1.19917	2.33459	2.73931	0.508513	1.01514	1.34386	1.36777	0.608042	1.43136	1.0396
hsa-miR-3157-5p	3	3	3	3	7	0	7	1	0	4	0.513931	0.36862	0.432522	0.508513	1.01514	0	1.06382	0.121608	0	0.462046
hsa-miR-3158-3p	697	937	1053	1137	574	1197	1422	1280	1585	954	119.403	115.132	151.815	192.726	83.2416	201.075	216.108	155.659	206.247	110.198
hsa-miR-3158-5p	696	926	1053	1135	569	1191	1421	1278	1582	942	119.232	113.781	151.815	192.387	82.5165	200.067	215.956	155.416	205.856	108.812
hsa-miR-31-5p	1326	1908	2637	913	2680	955	1493	1880	1488	1750	227.158	234.442	380.187	154.758	388.654	160.423	226.898	228.624	193.625	202.145
hsa-miR-3160-3p	1	0	1	0	0	0	0	0	0	0	0.17131	0	0.144174	0	0	0	0	0	0	0
hsa-miR-3160-5p	1	0	1	0	0	0	0	0	0	0	0.17131	0	0.144174	0	0	0	0	0	0	0
hsa-miR-3163	4	4	0	0	1	1	0	0	0	0	0.685242	0.491493	0	0	0.14502	0.167982	0	0	0	0
hsa-miR-3164	3	1	1	0	0	3	2	1	0	0	0.513931	0.122873	0.144174	0	0	0.503947	0.30395	0.121608	0	0
hsa-miR-3165	0	1	3	0	0	0	0	0	0	0	0	0.122873	0.432522	0	0	0	0	0	0	0
hsa-miR-3166	0	2	2	1	5	2	0	0	1	2	0	0.245746	0.288348	0.169504	0.725101	0.335965	0	0	0.130124	0.231023
hsa-miR-3167	5	7	0	3	3	2	6	3	1	3	0.856552	0.860113	0	0.508513	0.435061	0.335965	0.911849	0.364825	0.130124	0.346534
hsa-miR-3170	2	3	5	0	3	6	5	4	4	0	0.342621	0.36862	0.72087	0	0.435061	1.00789	0.759874	0.486434	0.520496	0
hsa-miR-3173-3p	3	0	0	0	1	0	0	0	0	0	0.513931	0	0	0	0.14502	0	0	0	0	0
hsa-miR-3173-5p	1	1	1	4	2	2	1	4	3	7	0.17131	0.122873	0.144174	0.678018	0.29004	0.335965	0.151975	0.486434	0.390372	0.80858
hsa-miR-3174	2	3	1	6	5	17	5	5	2	14	0.342621	0.36862	0.144174	1.01703	0.725101	2.8557	0.759874	0.608042	0.260248	1.61716
hsa-miR-3175	2	4	2	1	1	1	4	4	5	4	0.342621	0.491493	0.288348	0.169504	0.14502	0.167982	0.607899	0.486434	0.65062	0.462046
hsa-miR-3176	4	2	1	2	3	5	2	3	2	5	0.685242	0.245746	0.144174	0.339009	0.435061	0.839912	0.30395	0.364825	0.260248	0.577557
hsa-miR-3177-3p	10	8	24	21	18	5	5	21	19	21	1.7131	0.982986	3.46018	3.55959	2.61036	0.839912	0.759874	2.55378	2.47236	2.42574
hsa-miR-3177-5p	0	0	1	0	2	0	0	7	0	0	0	0	0.144174	0	0.29004	0	0	0.851259	0	0
hsa-miR-3179	1	1	1	0	1	3	0	1	2	5	0.17131	0.122873	0.144174	0	0.14502	0.503947	0	0.121608	0.260248	0.577557
hsa-miR-3180	2	6	2	1	0	1	3	1	3	4	0.342621	0.737239	0.288348	0.169504	0	0.167982	0.455924	0.121608	0.390372	0.462046
hsa-miR-3180-3p	2	6	2	1	0	1	3	1	3	4	0.342621	0.737239	0.288348	0.169504	0	0.167982	0.455924	0.121608	0.390372	0.462046
hsa-miR-3180-5p	2	6	5	2	3	3	3	3	1	3	0.342621	0.737239	0.72087	0.339009	0.435061	0.503947	0.455924	0.364825	0.130124	0.346534
hsa-miR-3183	0	0	2	0	1	0	0	2	1	0	0	0	0.288348	0	0.14502	0	0	0.243217	0.130124	0
hsa-miR-3184-3p	3474	5156	5831	3879	5296	3662	3774	5114	4246	5360	595.133	633.534	840.679	657.508	768.027	615.152	573.553	621.906	552.507	619.141
hsa-miR-3184-5p	9684	18300	14038	16900	15254	12922	13019	17022	19454	19940	1658.97	2248.58	2023.92	2864.62	2212.14	2170.67	1978.56	2070.02	2531.43	2303.3
hsa-miR-3186-3p	0	0	0	0	1	0	0	0	0	0	0	0	0	0	0.14502	0	0	0	0	0
hsa-miR-3187-3p	2	3	13	2	2	2	3	1	2	6	0.342621	0.36862	1.87426	0.339009	0.29004	0.335965	0.455924	0.121608	0.260248	0.693069
hsa-miR-3187-5p	1	0	0	3	0	0	0	3	0	0	0.17131	0	0	0.508513	0	0	0	0.364825	0	0
hsa-miR-3188	1	0	3	2	0	0	0	0	2	0	0.17131	0	0.432522	0.339009	0	0	0	0	0.260248	0
hsa-miR-3189-3p	0	1	0	1	1	0	2	0	0	4	0	0.122873	0	0.169504	0.14502	0	0.30395	0	0	0.462046
hsa-miR-3190-3p	2	0	0	0	4	0	2	6	2	5	0.342621	0	0	0	0.580081	0	0.30395	0.729651	0.260248	0.577557
hsa-miR-3190-5p	0	1	1	0	1	0	0	0	0	0	0	0.122873	0.144174	0	0.14502	0	0	0	0	0
hsa-miR-3191-3p	0	1	1	0	1	0	0	0	0	0	0	0.122873	0.144174	0	0.14502	0	0	0	0	0
hsa-miR-3191-5p	2	0	0	0	4	0	2	6	2	5	0.342621	0	0	0	0.580081	0	0.30395	0.729651	0.260248	0.577557
hsa-miR-3192-5p	2	4	2	2	1	0	0	0	0	0	0.342621	0.491493	0.288348	0.339009	0.14502	0	0	0	0	0
hsa-miR-3193	0	0	4	0	0	2	0	0	6	0	0	0	0.576696	0	0	0.335965	0	0	0.780744	0
hsa-miR-3198	0	0	0	0	3	0	2	0	0	0	0	0	0	0	0.435061	0	0.30395	0	0	0
hsa-miR-3199	1	5	3	0	1	1	3	3	1	3	0.17131	0.614366	0.432522	0	0.14502	0.167982	0.455924	0.364825	0.130124	0.346534
hsa-miR-3200-3p	7	3	7	6	8	0	0	7	2	8	1.19917	0.36862	1.00922	1.01703	1.16016	0	0	0.851259	0.260248	0.924092
hsa-miR-320a-3p	3856	5856	5404	3765	6346	3304	4382	4112	4732	7337	660.573	719.546	779.117	638.184	920.298	555.014	665.954	500.054	615.747	847.508
hsa-miR-320a-5p	0	0	1	0	0	2	0	1	3	0	0	0	0.144174	0	0	0.335965	0	0.121608	0.390372	0
hsa-miR-320b	85	112	110	103	139	80	112	130	69	212	14.5614	13.7618	15.8591	17.459	20.1578	13.4386	17.0212	15.8091	8.97856	24.4884
hsa-miR-320c	14	16	5	21	28	18	15	31	8	32	2.39835	1.96597	0.72087	3.55959	4.06057	3.02368	2.27962	3.76986	1.04099	3.69637
hsa-miR-320d	8	1	6	10	5	5	3	9	1	15	1.37048	0.122873	0.865045	1.69504	0.725101	0.839912	0.455924	1.09448	0.130124	1.73267
hsa-miR-323a-3p	2	9	3	16	8	3	4	17	6	16	0.342621	1.10586	0.432522	2.71207	1.16016	0.503947	0.607899	2.06734	0.780744	1.84818
hsa-miR-323b-3p	0	0	4	0	1	0	1	1	1	0	0	0	0.576696	0	0.14502	0	0.151975	0.121608	0.130124	0
hsa-miR-32-3p	61	76	101	80	121	44	96	130	77	150	10.4499	9.33837	14.5616	13.5604	17.5474	7.39123	14.5896	15.8091	10.0196	17.3267
hsa-miR-324-3p	0	4	4	2	2	0	1	6	11	3	0	0.491493	0.576696	0.339009	0.29004	0	0.151975	0.729651	1.43136	0.346534
hsa-miR-324-5p	13	9	17	8	23	11	9	11	19	16	2.22704	1.10586	2.45096	1.35604	3.33546	1.84781	1.36777	1.33769	2.47236	1.84818
hsa-miR-32-5p	178	214	403	229	479	97	176	384	217	346	30.4933	26.2949	58.1022	38.8165	69.4647	16.2943	26.7476	46.6977	28.2369	39.967
hsa-miR-326	0	1	5	0	5	2	8	0	6	1	0	0.122873	0.72087	0	0.725101	0.335965	1.2158	0	0.780744	0.115511
hsa-miR-328-3p	270	400	695	367	775	225	269	412	320	466	46.2538	49.1493	100.201	62.2081	112.391	37.796	40.8812	50.1027	41.6397	53.8283
hsa-miR-328-5p	0	1	0	0	2	0	0	0	0	0	0	0.122873	0	0	0.29004	0	0	0	0	0
hsa-miR-329-3p	1	0	2	1	1	0	4	0	0	0	0.17131	0	0.288348	0.169504	0.14502	0	0.607899	0	0	0
hsa-miR-329-5p	1	0	0	0	0	0	0	0	0	0	0.17131	0	0	0	0	0	0	0	0	0
hsa-miR-330-3p	431	502	504	418	439	488	552	503	567	618	73.8348	61.6824	72.6637	70.8528	63.6639	81.9754	83.8901	61.1691	73.7803	71.3861
hsa-miR-330-5p	106	216	205	175	196	131	153	216	190	241	18.1589	26.5406	29.5557	29.6633	28.424	22.0057	23.2521	26.2674	24.7236	27.8383
hsa-miR-331-3p	47	69	145	68	139	47	82	78	38	77	8.05159	8.47825	20.9052	11.5263	20.1578	7.89517	12.4619	9.48546	4.94471	8.89438
hsa-miR-331-5p	661	1068	871	914	962	617	923	852	915	1000	113.236	131.229	125.576	154.927	139.509	103.645	140.273	103.61	119.064	115.511
hsa-miR-335-3p	330	424	344	196	167	222	332	391	440	556	56.5325	52.0983	49.5959	33.2229	24.2184	37.2921	50.4556	47.5489	57.2546	64.2244
hsa-miR-335-5p	24	36	25	8	35	13	13	33	20	33	4.11145	4.42344	3.60435	1.35604	5.07571	2.18377	1.97567	4.01308	2.60248	3.81188
hsa-miR-338-3p	1	0	1	1	1	1	1	3	3	3	0.17131	0	0.144174	0.169504	0.14502	0.167982	0.151975	0.364825	0.390372	0.346534
hsa-miR-339-3p	245	340	408	366	361	194	265	324	318	367	41.9711	41.7769	58.823	62.0386	52.3523	32.5886	40.2733	39.4012	41.3795	42.3927
hsa-miR-339-5p	142	161	167	114	176	73	134	187	163	250	24.3261	19.7826	24.0771	19.3235	25.5236	12.2627	20.3646	22.7408	21.2102	28.8779
hsa-miR-33a-3p	1	1	0	0	2	0	3	3	0	3	0.17131	0.122873	0	0	0.29004	0	0.455924	0.364825	0	0.346534
hsa-miR-33a-5p	3	1	1	2	1	0	0	5	2	3	0.513931	0.122873	0.144174	0.339009	0.14502	0	0	0.608042	0.260248	0.346534
hsa-miR-33b-3p	1	0	4	8	1	1	2	3	1	2	0.17131	0	0.576696	1.35604	0.14502	0.167982	0.30395	0.364825	0.130124	0.231023
hsa-miR-340-3p	565	944	532	803	680	530	675	657	983	1239	96.7904	115.992	76.7006	136.112	98.6137	89.0307	102.583	79.8968	127.912	143.119
hsa-miR-340-5p	637	701	933	553	1045	442	574	1104	594	931	109.125	86.1341	134.514	93.7359	151.546	74.2482	87.2335	134.256	77.2937	107.541
hsa-miR-342-3p	1089	1252	1861	593	1787	761	1569	1625	1108	1098	186.557	153.837	268.308	100.516	259.151	127.835	238.448	197.614	144.177	126.832
hsa-miR-342-5p	38	67	34	29	72	16	25	42	27	59	6.5098	8.23251	4.90192	4.91563	10.4415	2.68772	3.79937	5.10756	3.51335	6.81518
hsa-miR-345-3p	0	1	0	1	5	0	0	1	0	1	0	0.122873	0	0.169504	0.725101	0	0	0.121608	0	0.115511
hsa-miR-345-5p	1076	2087	2497	1520	2390	1261	1627	2095	2001	2220	184.33	256.436	360.003	257.647	346.598	211.826	247.263	254.77	260.378	256.435
hsa-miR-34a-3p	2	3	1	0	1	0	3	3	0	2	0.342621	0.36862	0.144174	0	0.14502	0	0.455924	0.364825	0	0.231023
hsa-miR-34a-5p	1540	1727	2910	813	2539	934	1294	2290	1257	1629	263.818	212.202	419.547	137.807	368.206	156.896	196.655	278.483	163.566	188.168
hsa-miR-34b-3p	24	17	58	25	36	26	47	38	32	39	4.11145	2.08885	8.3621	4.23761	5.22073	4.36754	7.14282	4.62112	4.16397	4.50495
hsa-miR-34b-5p	0	0	0	0	2	0	0	3	0	1	0	0	0	0	0.29004	0	0	0.364825	0	0.115511
hsa-miR-34c-3p	6	10	13	4	8	3	11	10	11	8	1.02786	1.22873	1.87426	0.678018	1.16016	0.503947	1.67172	1.21608	1.43136	0.924092
hsa-miR-34c-5p	576	700	1009	408	671	584	627	998	756	685	98.6748	86.0113	145.472	69.1578	97.3085	98.1017	95.2882	121.365	98.3738	79.1254
hsa-miR-3529-3p	20263	26075	17426	9584	14350	15885	17993	20314	18933	21659	3471.26	3203.92	2512.38	1624.53	2081.04	2668.4	2734.48	2470.35	2463.64	2501.86
hsa-miR-3605-3p	10	31	17	25	16	30	18	34	33	20	1.7131	3.80907	2.45096	4.23761	2.32032	5.03947	2.73555	4.13469	4.29409	2.31023
hsa-miR-3605-5p	25	38	19	20	27	15	10	19	26	31	4.28276	4.66918	2.73931	3.39009	3.91554	2.51974	1.51975	2.31056	3.38323	3.58086
hsa-miR-3609	2	1	1	1	5	6	1	6	1	5	0.342621	0.122873	0.144174	0.169504	0.725101	1.00789	0.151975	0.729651	0.130124	0.577557
hsa-miR-3611	0	1	3	0	4	0	0	0	0	0	0	0.122873	0.432522	0	0.580081	0	0	0	0	0
hsa-miR-361-3p	5237	7520	4956	4341	4952	5120	5232	5237	7421	7166	897.153	924.007	714.527	735.819	718.14	860.07	795.132	636.864	965.651	827.755
hsa-miR-3614-5p	0	0	0	0	0	0	0	0	1	0	0	0	0	0	0	0	0	0	0.130124	0
hsa-miR-3615	163	316	321	442	391	282	280	329	427	392	27.9236	38.8279	46.2799	74.9209	56.7029	47.371	42.5529	40.0092	55.563	45.2805
hsa-miR-361-5p	163	212	355	136	406	103	140	227	138	240	27.9236	26.0491	51.1818	23.0526	58.8782	17.3022	21.2765	27.6051	17.9571	27.7228
hsa-miR-3617-3p	0	0	0	0	1	0	0	0	0	0	0	0	0	0	0.14502	0	0	0	0	0
hsa-miR-3617-5p	6	1	1	1	3	0	3	1	2	0	1.02786	0.122873	0.144174	0.169504	0.435061	0	0.455924	0.121608	0.260248	0
hsa-miR-3619-3p	0	0	0	0	3	0	0	4	0	3	0	0	0	0	0.435061	0	0	0.486434	0	0.346534
hsa-miR-3619-5p	0	0	0	0	0	0	0	0	9	0	0	0	0	0	0	0	0	0	1.17112	0
hsa-miR-3620-5p	5	0	0	6	0	0	1	5	0	2	0.856552	0	0	1.01703	0	0	0.151975	0.608042	0	0.231023
hsa-miR-362-3p	0	0	0	0	2	2	0	1	0	0	0	0	0	0	0.29004	0.335965	0	0.121608	0	0
hsa-miR-362-5p	25	41	39	12	42	17	22	37	17	54	4.28276	5.0378	5.62279	2.03405	6.09085	2.8557	3.34345	4.49951	2.21211	6.23762
hsa-miR-363-3p	14	34	7	78	7	30	51	48	53	45	2.39835	4.17769	1.00922	13.2213	1.01514	5.03947	7.75072	5.83721	6.89658	5.19802
hsa-miR-363-5p	0	0	0	0	0	0	0	0	0	2	0	0	0	0	0	0	0	0	0	0.231023
hsa-miR-3648	0	0	0	0	0	2	0	0	0	0	0	0	0	0	0	0.335965	0	0	0	0
hsa-miR-3651	0	0	1	0	0	0	1	0	0	0	0	0	0.144174	0	0	0	0.151975	0	0	0
hsa-miR-3652	0	0	2	0	0	0	0	0	0	0	0	0	0.288348	0	0	0	0	0	0	0
hsa-miR-3654	0	0	0	0	0	2	0	0	0	0	0	0	0	0	0	0.335965	0	0	0	0
hsa-miR-3659	0	0	0	1	0	0	0	0	0	0	0	0	0	0.169504	0	0	0	0	0	0
hsa-miR-365a-3p	225	283	391	100	594	105	206	286	144	237	38.5449	34.7731	56.3721	16.9504	86.142	17.6382	31.3068	34.78	18.7379	27.3762
hsa-miR-365a-5p	254	296	373	170	281	221	272	253	279	377	43.5129	36.3705	53.7769	28.8157	40.7507	37.1241	41.3371	30.7669	36.3046	43.5478
hsa-miR-365b-5p	164	195	165	215	165	157	171	124	192	163	28.0949	23.9603	23.7887	36.4434	23.9283	26.3732	25.9877	15.0795	24.9838	18.8284
hsa-miR-3661	0	0	6	0	5	7	10	5	1	5	0	0	0.865045	0	0.725101	1.17588	1.51975	0.608042	0.130124	0.577557
hsa-miR-3662	8	7	4	1	3	7	14	21	13	11	1.37048	0.860113	0.576696	0.169504	0.435061	1.17588	2.12765	2.55378	1.69161	1.27063
hsa-miR-3664-3p	3	10	6	6	4	7	3	3	1	2	0.513931	1.22873	0.865045	1.01703	0.580081	1.17588	0.455924	0.364825	0.130124	0.231023
hsa-miR-3664-5p	1	4	6	4	2	0	8	3	1	7	0.17131	0.491493	0.865045	0.678018	0.29004	0	1.2158	0.364825	0.130124	0.80858
hsa-miR-3677-3p	0	0	3	0	0	0	0	2	4	0	0	0	0.432522	0	0	0	0	0.243217	0.520496	0
hsa-miR-3678-3p	2	1	4	1	0	7	2	1	5	4	0.342621	0.122873	0.576696	0.169504	0	1.17588	0.30395	0.121608	0.65062	0.462046
hsa-miR-3679-3p	0	0	0	0	0	0	0	0	10	0	0	0	0	0	0	0	0	0	1.30124	0
hsa-miR-3679-5p	2	2	3	1	1	1	1	2	0	2	0.342621	0.245746	0.432522	0.169504	0.14502	0.167982	0.151975	0.243217	0	0.231023
hsa-miR-3680-3p	0	0	0	0	3	0	0	0	0	0	0	0	0	0	0.435061	0	0	0	0	0
hsa-miR-3681-5p	0	1	0	1	0	4	0	2	0	0	0	0.122873	0	0.169504	0	0.67193	0	0.243217	0	0
hsa-miR-3682-5p	0	0	1	0	0	0	0	0	0	0	0	0	0.144174	0	0	0	0	0	0	0
hsa-miR-3684	0	2	1	0	1	0	1	0	5	0	0	0.245746	0.144174	0	0.14502	0	0.151975	0	0.65062	0
hsa-miR-3685	1	4	1	0	0	0	0	0	0	0	0.17131	0.491493	0.144174	0	0	0	0	0	0	0
hsa-miR-3688-3p	0	1	2	4	2	6	4	1	5	1	0	0.122873	0.288348	0.678018	0.29004	1.00789	0.607899	0.121608	0.65062	0.115511
hsa-miR-3688-5p	0	1	2	4	2	2	4	1	5	1	0	0.122873	0.288348	0.678018	0.29004	0.335965	0.607899	0.121608	0.65062	0.115511
hsa-miR-3691-3p	0	0	0	1	0	0	0	0	0	2	0	0	0	0.169504	0	0	0	0	0	0.231023
hsa-miR-3691-5p	2	3	4	4	5	2	2	2	2	2	0.342621	0.36862	0.576696	0.678018	0.725101	0.335965	0.30395	0.243217	0.260248	0.231023
hsa-miR-369-3p	1	1	1	9	4	0	1	0	3	0	0.17131	0.122873	0.144174	1.52554	0.580081	0	0.151975	0	0.390372	0
hsa-miR-369-5p	1	1	2	3	4	1	0	6	0	1	0.17131	0.122873	0.288348	0.508513	0.580081	0.167982	0	0.729651	0	0.115511
hsa-miR-370-3p	16	22	15	57	30	7	4	15	5	30	2.74097	2.70321	2.16261	9.66175	4.35061	1.17588	0.607899	1.82413	0.65062	3.46534
hsa-miR-374a-3p	271	246	412	202	275	301	288	605	295	386	46.4251	30.2268	59.3997	34.2399	39.8805	50.5627	43.7687	73.5731	38.3866	44.5874
hsa-miR-374a-5p	187	292	332	268	497	140	194	343	197	368	32.0351	35.879	47.8658	45.4272	72.075	23.5175	29.4831	41.7117	25.6344	42.5082
hsa-miR-374b-3p	40	50	35	17	56	18	38	61	28	55	6.85242	6.14366	5.04609	2.88157	8.12113	3.02368	5.77504	7.41812	3.64347	6.35313
hsa-miR-374b-5p	377	410	406	376	643	249	323	510	343	611	64.5841	50.378	58.5347	63.7337	93.248	41.8276	49.0879	62.0203	44.6326	70.5775
hsa-miR-374c-3p	373	407	406	375	643	249	323	507	343	609	63.8988	50.0094	58.5347	63.5641	93.248	41.8276	49.0879	61.6555	44.6326	70.3465
hsa-miR-374c-5p	1	3	3	2	0	0	5	2	0	1	0.17131	0.36862	0.432522	0.339009	0	0	0.759874	0.243217	0	0.115511
hsa-miR-375-3p	28	31	17	9	12	12	23	17	15	24	4.79669	3.80907	2.45096	1.52554	1.74024	2.01579	3.49542	2.06734	1.95186	2.77228
hsa-miR-376a-3p	0	0	0	1	0	0	0	0	0	0	0	0	0	0.169504	0	0	0	0	0	0
hsa-miR-377-3p	0	0	0	0	0	0	1	0	0	0	0	0	0	0	0	0	0.151975	0	0	0
hsa-miR-377-5p	0	0	0	0	0	0	2	0	0	0	0	0	0	0	0	0	0.30395	0	0	0
hsa-miR-378a-3p	1607	2641	2958	2030	2450	1557	1787	2583	2038	2738	275.296	324.508	426.467	344.094	355.299	261.549	271.579	314.115	265.193	316.27
hsa-miR-378a-5p	9	5	14	8	6	1	8	12	2	8	1.54179	0.614366	2.01844	1.35604	0.870121	0.167982	1.2158	1.4593	0.260248	0.924092
hsa-miR-378c	41	67	68	44	60	30	26	57	33	50	7.02373	8.23251	9.80384	7.45819	8.70121	5.03947	3.95134	6.93168	4.29409	5.77557
hsa-miR-378d	28	54	49	29	39	17	11	39	23	30	4.79669	6.63516	7.06453	4.91563	5.65579	2.8557	1.67172	4.74273	2.99285	3.46534
hsa-miR-378e	0	0	0	0	0	0	0	0	1	0	0	0	0	0	0	0	0	0	0.130124	0
hsa-miR-378g	0	0	0	0	0	0	0	0	1	0	0	0	0	0	0	0	0	0	0.130124	0
hsa-miR-378i	0	0	0	0	0	1	0	1	0	0	0	0	0	0	0	0.167982	0	0.121608	0	0
hsa-miR-379-3p	0	1	0	0	4	2	2	0	1	3	0	0.122873	0	0	0.580081	0.335965	0.30395	0	0.130124	0.346534
hsa-miR-379-5p	83	63	94	82	58	46	62	48	54	65	14.2188	7.74101	13.5524	13.8994	8.41117	7.72719	9.42244	5.83721	7.0267	7.50825
hsa-miR-380-5p	0	0	0	1	0	0	0	1	0	0	0	0	0	0.169504	0	0	0	0.121608	0	0
hsa-miR-381-3p	38	75	75	534	53	35	42	102	54	35	6.5098	9.21549	10.8131	90.5153	7.68607	5.87938	6.38294	12.4041	7.0267	4.0429
hsa-miR-382-3p	5	2	3	9	4	5	1	6	9	2	0.856552	0.245746	0.432522	1.52554	0.580081	0.839912	0.151975	0.729651	1.17112	0.231023
hsa-miR-382-5p	2	8	5	9	6	4	6	3	12	5	0.342621	0.982986	0.72087	1.52554	0.870121	0.67193	0.911849	0.364825	1.56149	0.577557
hsa-miR-383-5p	0	0	2	0	0	0	0	0	0	0	0	0	0.288348	0	0	0	0	0	0	0
hsa-miR-3909	482	825	716	584	614	509	596	779	847	761	82.5717	101.37	103.229	98.9906	89.0424	85.503	90.577	94.733	110.215	87.9042
hsa-miR-3911	0	0	0	0	1	0	0	1	0	0	0	0	0	0	0.14502	0	0	0.121608	0	0
hsa-miR-3912-3p	3	1	3	13	6	0	3	1	0	3	0.513931	0.122873	0.432522	2.20356	0.870121	0	0.455924	0.121608	0	0.346534
hsa-miR-3913-3p	59	114	94	139	104	80	111	98	138	158	10.1073	14.0076	13.5524	23.5611	15.0821	13.4386	16.8692	11.9176	17.9571	18.2508
hsa-miR-3913-5p	60	119	94	141	107	80	111	97	138	155	10.2786	14.6219	13.5524	23.9001	15.5172	13.4386	16.8692	11.796	17.9571	17.9043
hsa-miR-3916	0	2	5	2	1	0	1	4	2	1	0	0.245746	0.72087	0.339009	0.14502	0	0.151975	0.486434	0.260248	0.115511
hsa-miR-3917	0	2	2	0	3	0	6	0	1	4	0	0.245746	0.288348	0	0.435061	0	0.911849	0	0.130124	0.462046
hsa-miR-3918	10	4	0	2	3	0	7	2	1	3	1.7131	0.491493	0	0.339009	0.435061	0	1.06382	0.243217	0.130124	0.346534
hsa-miR-3919	0	1	1	0	0	0	2	0	0	0	0	0.122873	0.144174	0	0	0	0.30395	0	0	0
hsa-miR-3922-5p	1	0	0	0	0	0	0	0	0	0	0.17131	0	0	0	0	0	0	0	0	0
hsa-miR-3924	0	2	0	0	0	0	0	0	0	2	0	0.245746	0	0	0	0	0	0	0	0.231023
hsa-miR-3925-3p	0	0	0	0	0	0	2	0	0	1	0	0	0	0	0	0	0.30395	0	0	0.115511
hsa-miR-3925-5p	0	0	0	0	0	0	0	0	2	0	0	0	0	0	0	0	0	0	0.260248	0
hsa-miR-3927-3p	0	0	0	0	0	0	1	0	0	0	0	0	0	0	0	0	0.151975	0	0	0
hsa-miR-3927-5p	0	0	0	0	2	0	0	1	1	0	0	0	0	0	0.29004	0	0	0.121608	0.130124	0
hsa-miR-3928-3p	2	5	3	2	12	2	6	4	14	2	0.342621	0.614366	0.432522	0.339009	1.74024	0.335965	0.911849	0.486434	1.82174	0.231023
hsa-miR-3929	6	10	11	6	7	2	5	5	6	2	1.02786	1.22873	1.58591	1.01703	1.01514	0.335965	0.759874	0.608042	0.780744	0.231023
hsa-miR-3934-5p	70	70	90	63	74	53	45	80	59	72	11.9917	8.60113	12.9757	10.6788	10.7315	8.90307	6.83887	9.72868	7.67732	8.31683
hsa-miR-3935	0	0	0	3	0	0	1	0	1	3	0	0	0	0.508513	0	0	0.151975	0	0.130124	0.346534
hsa-miR-3938	1	1	0	3	6	1	2	0	0	0	0.17131	0.122873	0	0.508513	0.870121	0.167982	0.30395	0	0	0
hsa-miR-3939	1	0	2	0	0	0	0	0	0	4	0.17131	0	0.288348	0	0	0	0	0	0	0.462046
hsa-miR-3940-3p	2	3	10	5	4	1	10	2	6	0	0.342621	0.36862	1.44174	0.847522	0.580081	0.167982	1.51975	0.243217	0.780744	0
hsa-miR-3941	0	2	2	0	6	4	1	4	0	6	0	0.245746	0.288348	0	0.870121	0.67193	0.151975	0.486434	0	0.693069
hsa-miR-3942-3p	0	0	0	0	0	0	0	2	0	0	0	0	0	0	0	0	0	0.243217	0	0
hsa-miR-3942-5p	0	5	0	0	0	1	0	5	0	0	0	0.614366	0	0	0	0.167982	0	0.608042	0	0
hsa-miR-3944-3p	0	0	3	0	0	0	2	1	0	0	0	0	0.432522	0	0	0	0.30395	0.121608	0	0
hsa-miR-3944-5p	0	1	0	0	0	2	0	1	1	0	0	0.122873	0	0	0	0.335965	0	0.121608	0.130124	0
hsa-miR-409-3p	31	30	25	42	25	17	20	38	44	18	5.31063	3.6862	3.60435	7.11918	3.6255	2.8557	3.0395	4.62112	5.72546	2.07921
hsa-miR-409-5p	0	4	1	1	0	0	2	1	1	4	0	0.491493	0.144174	0.169504	0	0	0.30395	0.121608	0.130124	0.462046
hsa-miR-410-3p	0	1	0	5	4	0	0	1	0	2	0	0.122873	0	0.847522	0.580081	0	0	0.121608	0	0.231023
hsa-miR-411-3p	1	4	3	8	0	1	3	0	3	2	0.17131	0.491493	0.432522	1.35604	0	0.167982	0.455924	0	0.390372	0.231023
hsa-miR-411-5p	7	11	24	23	10	2	16	15	11	10	1.19917	1.35161	3.46018	3.8986	1.4502	0.335965	2.4316	1.82413	1.43136	1.15511
hsa-miR-412-5p	0	4	5	0	0	3	2	0	2	1	0	0.491493	0.72087	0	0	0.503947	0.30395	0	0.260248	0.115511
hsa-miR-421	54	60	45	33	67	19	28	51	46	42	9.25077	7.37239	6.48783	5.59365	9.71635	3.19167	4.25529	6.20203	5.98571	4.85148
hsa-miR-423-3p	9765	18457	14145	17002	15417	13005	13126	17153	19575	20113	1672.85	2267.87	2039.34	2881.91	2235.78	2184.61	1994.82	2085.95	2547.18	2323.28
hsa-miR-423-5p	3474	5156	5831	3879	5296	3662	3774	5116	4246	5361	595.133	633.534	840.679	657.508	768.027	615.152	573.553	622.149	552.507	619.257
hsa-miR-424-3p	66	164	112	163	180	105	115	114	226	243	11.3065	20.1512	16.1475	27.6292	26.1036	17.6382	17.4771	13.8634	29.408	28.0693
hsa-miR-424-5p	15	13	29	22	23	5	10	13	15	21	2.56966	1.59735	4.18105	3.7291	3.33546	0.839912	1.51975	1.58091	1.95186	2.42574
hsa-miR-425-3p	108	150	308	101	241	125	149	197	195	137	18.5015	18.431	44.4056	17.1199	34.9499	20.9978	22.6442	23.9569	25.3742	15.8251
hsa-miR-425-5p	3999	5203	5301	2642	5338	4349	6110	5774	5612	5332	685.071	639.31	764.267	447.831	774.118	730.555	928.566	702.167	730.256	615.907
hsa-miR-4286	7	3	20	4	17	0	3	13	10	15	1.19917	0.36862	2.88348	0.678018	2.46534	0	0.455924	1.58091	1.30124	1.73267
hsa-miR-429	2220	3023	2865	2493	3748	1596	2321	3202	2340	4021	380.309	371.446	413.059	422.574	543.536	268.1	352.734	389.39	304.49	464.472
hsa-miR-431-5p	6	0	0	8	0	0	0	1	1	0	1.02786	0	0	1.35604	0	0	0	0.121608	0.130124	0
hsa-miR-432-5p	5	1	2	3	0	0	0	0	0	0	0.856552	0.122873	0.288348	0.508513	0	0	0	0	0	0
hsa-miR-4326	85	149	94	117	139	113	123	137	132	134	14.5614	18.3081	13.5524	19.832	20.1578	18.982	18.6929	16.6604	17.1764	15.4785
hsa-miR-433-3p	3	1	2	1	0	0	2	1	0	1	0.513931	0.122873	0.288348	0.169504	0	0	0.30395	0.121608	0	0.115511
hsa-miR-4421	7	23	22	18	13	5	9	11	18	13	1.19917	2.82608	3.17183	3.05108	1.88526	0.839912	1.36777	1.33769	2.34223	1.50165
hsa-miR-4422	0	0	0	0	0	0	0	1	0	0	0	0	0	0	0	0	0	0.121608	0	0
hsa-miR-4423-3p	2	8	0	0	2	0	0	1	5	0	0.342621	0.982986	0	0	0.29004	0	0	0.121608	0.65062	0
hsa-miR-4423-5p	7	1	7	0	1	1	0	2	1	2	1.19917	0.122873	1.00922	0	0.14502	0.167982	0	0.243217	0.130124	0.231023
hsa-miR-4424	0	0	0	0	1	0	0	0	0	0	0	0	0	0	0.14502	0	0	0	0	0
hsa-miR-4429	0	1	0	0	0	0	0	0	0	0	0	0.122873	0	0	0	0	0	0	0	0
hsa-miR-4435	0	1	0	0	0	3	0	0	3	2	0	0.122873	0	0	0	0.503947	0	0	0.390372	0.231023
hsa-miR-4439	0	1	5	0	0	0	2	0	0	1	0	0.122873	0.72087	0	0	0	0.30395	0	0	0.115511
hsa-miR-4440	0	1	0	0	0	0	0	0	0	0	0	0.122873	0	0	0	0	0	0	0	0
hsa-miR-4449	1	0	2	0	0	0	0	0	0	1	0.17131	0	0.288348	0	0	0	0	0	0	0.115511
hsa-miR-4454	1	0	2	0	5	1	6	3	0	1	0.17131	0	0.288348	0	0.725101	0.167982	0.911849	0.364825	0	0.115511
hsa-miR-4466	0	0	3	0	3	0	0	0	0	1	0	0	0.432522	0	0.435061	0	0	0	0	0.115511
hsa-miR-4467	5	11	0	1	3	6	4	2	3	12	0.856552	1.35161	0	0.169504	0.435061	1.00789	0.607899	0.243217	0.390372	1.38614
hsa-miR-4470	0	0	0	0	0	0	0	1	3	0	0	0	0	0	0	0	0	0.121608	0.390372	0
hsa-miR-4473	201	262	290	242	250	243	327	251	369	276	34.4334	32.1928	41.8105	41.0201	36.255	40.8197	49.6958	30.5237	48.0158	31.8812
hsa-miR-4474-3p	2	0	0	0	1	5	4	3	3	3	0.342621	0	0	0	0.14502	0.839912	0.607899	0.364825	0.390372	0.346534
hsa-miR-4477b	4	12	3	2	2	6	2	6	3	5	0.685242	1.47448	0.432522	0.339009	0.29004	1.00789	0.30395	0.729651	0.390372	0.577557
hsa-miR-4479	0	0	1	2	2	0	1	0	1	1	0	0	0.144174	0.339009	0.29004	0	0.151975	0	0.130124	0.115511
hsa-miR-448	0	0	0	1	0	0	0	0	0	0	0	0	0	0.169504	0	0	0	0	0	0
hsa-miR-4482-3p	0	0	0	1	0	3	0	0	5	0	0	0	0	0.169504	0	0.503947	0	0	0.65062	0
hsa-miR-4485-3p	7	9	12	10	3	5	14	17	9	13	1.19917	1.10586	1.73009	1.69504	0.435061	0.839912	2.12765	2.06734	1.17112	1.50165
hsa-miR-4487	0	1	0	0	0	0	0	0	0	0	0	0.122873	0	0	0	0	0	0	0	0
hsa-miR-4488	0	0	3	0	1	0	1	0	0	0	0	0	0.432522	0	0.14502	0	0.151975	0	0	0
hsa-miR-4489	6	0	0	0	0	0	0	0	0	0	1.02786	0	0	0	0	0	0	0	0	0
hsa-miR-4498	0	0	0	0	1	1	6	0	0	2	0	0	0	0	0.14502	0.167982	0.911849	0	0	0.231023
hsa-miR-4499	0	0	0	0	0	0	0	1	0	0	0	0	0	0	0	0	0	0.121608	0	0
hsa-miR-449a	4	2	1	0	2	2	1	4	0	1	0.685242	0.245746	0.144174	0	0.29004	0.335965	0.151975	0.486434	0	0.115511
hsa-miR-449c-5p	16	25	20	21	25	22	37	54	37	69	2.74097	3.07183	2.88348	3.55959	3.6255	3.69561	5.62307	6.56686	4.81459	7.97029
hsa-miR-4504	13	10	5	7	17	17	23	9	4	9	2.22704	1.22873	0.72087	1.18653	2.46534	2.8557	3.49542	1.09448	0.520496	1.0396
hsa-miR-4505	0	0	1	0	0	0	0	0	0	0	0	0	0.144174	0	0	0	0	0	0	0
hsa-miR-4508	1	0	5	2	0	1	0	0	1	0	0.17131	0	0.72087	0.339009	0	0.167982	0	0	0.130124	0
hsa-miR-450a-1-3p	4	1	2	4	2	0	1	0	0	3	0.685242	0.122873	0.288348	0.678018	0.29004	0	0.151975	0	0	0.346534
hsa-miR-450a-2-3p	9	6	12	4	7	17	6	7	12	5	1.54179	0.737239	1.73009	0.678018	1.01514	2.8557	0.911849	0.851259	1.56149	0.577557
hsa-miR-450a-5p	144	217	309	209	248	125	199	331	168	264	24.6687	26.6635	44.5498	35.4264	35.965	20.9978	30.243	40.2524	21.8608	30.495
hsa-miR-450b-5p	492	557	499	401	390	367	557	803	507	614	84.2848	68.4404	71.9429	67.9713	56.5579	61.6495	84.65	97.6516	65.9729	70.924
hsa-miR-4511	0	0	2	2	0	0	1	3	1	1	0	0	0.288348	0.339009	0	0	0.151975	0.364825	0.130124	0.115511
hsa-miR-4515	0	0	0	0	0	0	0	1	0	0	0	0	0	0	0	0	0	0.121608	0	0
hsa-miR-4517	0	1	0	0	1	0	0	2	0	0	0	0.122873	0	0	0.14502	0	0	0.243217	0	0
hsa-miR-451a	1181	963	569	8992	431	583	599	548	740	816	202.318	118.327	82.0351	1524.18	62.5037	97.9337	91.0329	66.6415	96.2918	94.2574
hsa-miR-451b	0	1	0	0	0	0	0	0	0	0	0	0.122873	0	0	0	0	0	0	0	0
hsa-miR-4520-2-3p	0	0	0	1	0	0	0	4	0	0	0	0	0	0.169504	0	0	0	0.486434	0	0
hsa-miR-4520-3p	0	0	0	1	1	2	1	6	0	1	0	0	0	0.169504	0.14502	0.335965	0.151975	0.729651	0	0.115511
hsa-miR-4520-5p	0	0	0	1	0	0	0	4	0	0	0	0	0	0.169504	0	0	0	0.486434	0	0
hsa-miR-4521	123	142	143	71	345	52	112	156	109	146	21.0712	17.448	20.6169	12.0348	50.032	8.73508	17.0212	18.9709	14.1835	16.8647
hsa-miR-4522	0	1	1	0	0	0	6	1	5	0	0	0.122873	0.144174	0	0	0	0.911849	0.121608	0.65062	0
hsa-miR-4524a-5p	0	0	0	0	0	0	0	1	0	0	0	0	0	0	0	0	0	0.121608	0	0
hsa-miR-4524b-3p	0	0	0	0	0	0	0	1	0	0	0	0	0	0	0	0	0	0.121608	0	0
hsa-miR-452-5p	4509	6056	5601	2150	5177	3264	3871	5109	3617	4492	772.439	744.12	807.519	364.434	750.769	548.295	588.294	621.298	470.659	518.878
hsa-miR-4529-5p	0	0	0	0	0	3	1	0	0	0	0	0	0	0	0	0.503947	0.151975	0	0	0
hsa-miR-4536-3p	0	0	0	0	0	0	0	0	3	0	0	0	0	0	0	0	0	0	0.390372	0
hsa-miR-4536-5p	1	0	0	3	0	0	4	0	3	0	0.17131	0	0	0.508513	0	0	0.607899	0	0.390372	0
hsa-miR-454-3p	246	257	356	52	379	131	153	260	114	221	42.1424	31.5784	51.326	8.81423	54.9626	22.0057	23.2521	31.6182	14.8341	25.528
hsa-miR-454-5p	8	16	6	7	17	14	16	21	9	12	1.37048	1.96597	0.865045	1.18653	2.46534	2.35175	2.4316	2.55378	1.17112	1.38614
hsa-miR-455-3p	158	267	532	142	570	137	210	317	155	275	27.0671	32.8072	76.7006	24.0696	82.6615	23.0136	31.9147	38.5499	20.1692	31.7657
hsa-miR-455-5p	3039	5009	4951	3541	5456	2334	3223	4922	4255	4984	520.613	615.472	713.806	600.215	791.23	392.071	489.815	598.557	553.678	575.709
hsa-miR-4636	0	0	1	0	0	0	0	0	0	0	0	0	0.144174	0	0	0	0	0	0	0
hsa-miR-4638-3p	0	0	0	2	0	0	0	1	0	0	0	0	0	0.339009	0	0	0	0.121608	0	0
hsa-miR-4638-5p	1	3	2	0	1	0	3	1	6	6	0.17131	0.36862	0.288348	0	0.14502	0	0.455924	0.121608	0.780744	0.693069
hsa-miR-4639-5p	1	0	0	0	1	0	0	0	2	0	0.17131	0	0	0	0.14502	0	0	0	0.260248	0
hsa-miR-4640-3p	0	0	0	1	0	0	0	0	0	0	0	0	0	0.169504	0	0	0	0	0	0
hsa-miR-4640-5p	0	1	0	0	0	0	0	0	0	3	0	0.122873	0	0	0	0	0	0	0	0.346534
hsa-miR-4642	0	0	0	0	0	1	0	0	0	0	0	0	0	0	0	0.167982	0	0	0	0
hsa-miR-4644	0	0	0	1	0	0	0	0	4	0	0	0	0	0.169504	0	0	0	0	0.520496	0
hsa-miR-4645-3p	3	0	2	2	5	2	4	3	1	10	0.513931	0	0.288348	0.339009	0.725101	0.335965	0.607899	0.364825	0.130124	1.15511
hsa-miR-4647	2	4	15	7	4	9	12	5	12	5	0.342621	0.491493	2.16261	1.18653	0.580081	1.51184	1.8237	0.608042	1.56149	0.577557
hsa-miR-4648	2	1	0	0	1	0	0	0	0	2	0.342621	0.122873	0	0	0.14502	0	0	0	0	0.231023
hsa-miR-4653-5p	0	0	0	0	0	0	0	0	0	1	0	0	0	0	0	0	0	0	0	0.115511
hsa-miR-4654	0	0	0	0	0	5	0	1	0	0	0	0	0	0	0	0.839912	0	0.121608	0	0
hsa-miR-4659a-3p	2	6	6	11	2	1	1	1	1	3	0.342621	0.737239	0.865045	1.86455	0.29004	0.167982	0.151975	0.121608	0.130124	0.346534
hsa-miR-4659b-5p	2	6	6	11	2	1	1	1	1	3	0.342621	0.737239	0.865045	1.86455	0.29004	0.167982	0.151975	0.121608	0.130124	0.346534
hsa-miR-4660	0	0	0	0	1	0	0	0	3	6	0	0	0	0	0.14502	0	0	0	0.390372	0.693069
hsa-miR-4661-3p	0	0	2	0	0	0	0	0	1	0	0	0	0.288348	0	0	0	0	0	0.130124	0
hsa-miR-4661-5p	28	47	35	73	32	46	29	36	51	47	4.79669	5.77504	5.04609	12.3738	4.64065	7.72719	4.40727	4.37791	6.63633	5.42904
hsa-miR-4662a-5p	36	63	59	58	20	77	55	71	59	91	6.16718	7.74101	8.50627	9.83125	2.9004	12.9346	8.35861	8.6342	7.67732	10.5115
hsa-miR-4662b	36	63	59	58	20	77	55	71	59	91	6.16718	7.74101	8.50627	9.83125	2.9004	12.9346	8.35861	8.6342	7.67732	10.5115
hsa-miR-4664-3p	22	23	19	34	17	75	71	47	108	66	3.76883	2.82608	2.73931	5.76315	2.46534	12.5987	10.7902	5.7156	14.0534	7.62376
hsa-miR-4665-5p	4	1	3	5	2	0	0	2	1	4	0.685242	0.122873	0.432522	0.847522	0.29004	0	0	0.243217	0.130124	0.462046
hsa-miR-4667-3p	0	0	0	0	1	0	0	0	0	0	0	0	0	0	0.14502	0	0	0	0	0
hsa-miR-4667-5p	0	2	0	2	1	0	2	2	5	1	0	0.245746	0	0.339009	0.14502	0	0.30395	0.243217	0.65062	0.115511
hsa-miR-4669	0	0	0	0	0	0	2	0	0	2	0	0	0	0	0	0	0.30395	0	0	0.231023
hsa-miR-4671-3p	1	4	3	0	0	0	0	0	0	0	0.17131	0.491493	0.432522	0	0	0	0	0	0	0
hsa-miR-4671-5p	3	3	6	6	8	5	9	4	8	1	0.513931	0.36862	0.865045	1.01703	1.16016	0.839912	1.36777	0.486434	1.04099	0.115511
hsa-miR-4672	2	0	4	0	0	0	0	0	2	0	0.342621	0	0.576696	0	0	0	0	0	0.260248	0
hsa-miR-4674	0	0	0	0	2	2	0	1	1	0	0	0	0	0	0.29004	0.335965	0	0.121608	0.130124	0
hsa-miR-4676-3p	0	1	3	0	1	0	0	0	0	0	0	0.122873	0.432522	0	0.14502	0	0	0	0	0
hsa-miR-4676-5p	0	0	0	0	0	1	2	0	0	0	0	0	0	0	0	0.167982	0.30395	0	0	0
hsa-miR-4677-3p	36	55	41	31	24	32	35	63	40	33	6.16718	6.75803	5.91114	5.25464	3.48048	5.37544	5.31912	7.66133	5.20496	3.81188
hsa-miR-4677-5p	5	8	7	19	9	5	12	5	4	6	0.856552	0.982986	1.00922	3.22058	1.30518	0.839912	1.8237	0.608042	0.520496	0.693069
hsa-miR-4679	2	6	0	6	1	4	0	3	1	10	0.342621	0.737239	0	1.01703	0.14502	0.67193	0	0.364825	0.130124	1.15511
hsa-miR-4683	0	0	2	0	0	0	0	3	0	0	0	0	0.288348	0	0	0	0	0.364825	0	0
hsa-miR-4684-3p	67	75	78	63	47	108	109	92	87	51	11.4778	9.21549	11.2456	10.6788	6.81595	18.1421	16.5653	11.188	11.3208	5.89108
hsa-miR-4684-5p	0	5	1	2	1	3	2	2	6	6	0	0.614366	0.144174	0.339009	0.14502	0.503947	0.30395	0.243217	0.780744	0.693069
hsa-miR-4685-3p	0	4	0	0	3	2	0	0	2	0	0	0.491493	0	0	0.435061	0.335965	0	0	0.260248	0
hsa-miR-4687-3p	0	0	0	1	0	0	0	0	1	0	0	0	0	0.169504	0	0	0	0	0.130124	0
hsa-miR-4687-5p	0	2	1	0	0	0	0	0	0	4	0	0.245746	0.144174	0	0	0	0	0	0	0.462046
hsa-miR-4690-3p	0	0	0	0	0	0	0	1	0	0	0	0	0	0	0	0	0	0.121608	0	0
hsa-miR-4690-5p	0	4	4	0	0	0	0	1	0	1	0	0.491493	0.576696	0	0	0	0	0.121608	0	0.115511
hsa-miR-4694-3p	0	0	1	0	0	0	2	0	0	0	0	0	0.144174	0	0	0	0.30395	0	0	0
hsa-miR-4694-5p	0	0	2	0	0	1	0	0	0	0	0	0	0.288348	0	0	0.167982	0	0	0	0
hsa-miR-4695-3p	0	0	0	0	1	0	0	0	0	0	0	0	0	0	0.14502	0	0	0	0	0
hsa-miR-4699-3p	0	0	0	0	0	0	0	1	0	0	0	0	0	0	0	0	0	0.121608	0	0
hsa-miR-4699-5p	0	0	0	0	0	0	0	0	4	0	0	0	0	0	0	0	0	0	0.520496	0
hsa-miR-4701-5p	0	0	0	0	0	0	0	0	1	0	0	0	0	0	0	0	0	0	0.130124	0
hsa-miR-4706	1	0	0	0	0	0	0	0	0	0	0.17131	0	0	0	0	0	0	0	0	0
hsa-miR-4707-5p	2	0	0	0	0	1	0	0	0	1	0.342621	0	0	0	0	0.167982	0	0	0	0.115511
hsa-miR-4709-3p	13	12	7	2	14	5	18	13	8	2	2.22704	1.47448	1.00922	0.339009	2.03028	0.839912	2.73555	1.58091	1.04099	0.231023
hsa-miR-4709-5p	10	9	2	6	3	2	3	6	1	7	1.7131	1.10586	0.288348	1.01703	0.435061	0.335965	0.455924	0.729651	0.130124	0.80858
hsa-miR-4710	0	0	2	0	0	0	0	0	0	0	0	0	0.288348	0	0	0	0	0	0	0
hsa-miR-4717-3p	8	5	4	1	9	2	6	4	9	8	1.37048	0.614366	0.576696	0.169504	1.30518	0.335965	0.911849	0.486434	1.17112	0.924092
hsa-miR-4717-5p	8	5	4	1	9	2	6	4	9	8	1.37048	0.614366	0.576696	0.169504	1.30518	0.335965	0.911849	0.486434	1.17112	0.924092
hsa-miR-4723-5p	0	1	0	0	0	0	0	2	0	2	0	0.122873	0	0	0	0	0	0.243217	0	0.231023
hsa-miR-4725-3p	0	2	4	0	4	0	1	2	0	0	0	0.245746	0.576696	0	0.580081	0	0.151975	0.243217	0	0
hsa-miR-4726-5p	2	1	5	5	1	0	1	1	0	1	0.342621	0.122873	0.72087	0.847522	0.14502	0	0.151975	0.121608	0	0.115511
hsa-miR-4728-3p	0	3	3	1	0	0	0	1	4	0	0	0.36862	0.432522	0.169504	0	0	0	0.121608	0.520496	0
hsa-miR-4728-5p	0	0	0	0	0	0	0	0	2	0	0	0	0	0	0	0	0	0	0.260248	0
hsa-miR-4730	0	0	0	0	0	8	0	3	0	0	0	0	0	0	0	1.34386	0	0.364825	0	0
hsa-miR-4732-5p	0	0	0	0	1	0	1	0	0	0	0	0	0	0	0.14502	0	0.151975	0	0	0
hsa-miR-4733-3p	0	0	0	0	0	0	0	0	0	1	0	0	0	0	0	0	0	0	0	0.115511
hsa-miR-4733-5p	0	0	0	0	0	0	0	0	0	1	0	0	0	0	0	0	0	0	0	0.115511
hsa-miR-4738-3p	0	0	0	0	0	0	1	0	0	0	0	0	0	0	0	0	0.151975	0	0	0
hsa-miR-4740-5p	0	0	0	0	2	0	0	0	0	0	0	0	0	0	0.29004	0	0	0	0	0
hsa-miR-4741	0	0	0	0	0	0	0	2	0	0	0	0	0	0	0	0	0	0.243217	0	0
hsa-miR-4742-3p	2	1	3	1	1	0	3	2	2	2	0.342621	0.122873	0.432522	0.169504	0.14502	0	0.455924	0.243217	0.260248	0.231023
hsa-miR-4742-5p	4	2	3	0	4	2	3	3	0	2	0.685242	0.245746	0.432522	0	0.580081	0.335965	0.455924	0.364825	0	0.231023
hsa-miR-4743-5p	1	0	0	0	1	0	0	1	0	0	0.17131	0	0	0	0.14502	0	0	0.121608	0	0
hsa-miR-4744	3	0	0	2	0	0	2	1	0	1	0.513931	0	0	0.339009	0	0	0.30395	0.121608	0	0.115511
hsa-miR-4746-5p	21	75	59	80	54	64	67	72	101	75	3.59752	9.21549	8.50627	13.5604	7.83109	10.7509	10.1823	8.75581	13.1425	8.66336
hsa-miR-4747-3p	0	0	0	0	0	0	0	1	0	0	0	0	0	0	0	0	0	0.121608	0	0
hsa-miR-4748	0	0	0	0	0	0	0	0	0	1	0	0	0	0	0	0	0	0	0	0.115511
hsa-miR-4749-5p	0	0	0	0	0	0	3	0	0	0	0	0	0	0	0	0	0.455924	0	0	0
hsa-miR-4750-5p	2	2	1	1	1	0	0	2	1	0	0.342621	0.245746	0.144174	0.169504	0.14502	0	0	0.243217	0.130124	0
hsa-miR-4753-3p	1	0	0	0	0	0	0	2	0	0	0.17131	0	0	0	0	0	0	0.243217	0	0
hsa-miR-4753-5p	0	0	0	0	0	0	1	0	1	0	0	0	0	0	0	0	0.151975	0	0.130124	0
hsa-miR-4755-3p	2	3	6	6	3	3	5	6	8	6	0.342621	0.36862	0.865045	1.01703	0.435061	0.503947	0.759874	0.729651	1.04099	0.693069
hsa-miR-4755-5p	2	3	3	6	3	3	5	6	8	5	0.342621	0.36862	0.432522	1.01703	0.435061	0.503947	0.759874	0.729651	1.04099	0.577557
hsa-miR-4757-3p	0	0	2	0	0	0	0	0	1	0	0	0	0.288348	0	0	0	0	0	0.130124	0
hsa-miR-4758-3p	0	0	0	0	0	0	0	0	2	0	0	0	0	0	0	0	0	0	0.260248	0
hsa-miR-4759	1	0	0	0	0	0	0	3	0	0	0.17131	0	0	0	0	0	0	0.364825	0	0
hsa-miR-4762-3p	9	4	2	5	4	5	3	8	1	2	1.54179	0.491493	0.288348	0.847522	0.580081	0.839912	0.455924	0.972868	0.130124	0.231023
hsa-miR-4762-5p	0	0	1	0	0	0	0	1	0	0	0	0	0.144174	0	0	0	0	0.121608	0	0
hsa-miR-4766-3p	0	1	0	2	0	0	0	1	0	0	0	0.122873	0	0.339009	0	0	0	0.121608	0	0
hsa-miR-4766-5p	0	0	0	0	2	0	0	0	0	0	0	0	0	0	0.29004	0	0	0	0	0
hsa-miR-4768-3p	0	0	0	0	0	0	0	0	3	0	0	0	0	0	0	0	0	0	0.390372	0
hsa-miR-4768-5p	1	1	0	2	0	0	0	0	0	0	0.17131	0.122873	0	0.339009	0	0	0	0	0	0
hsa-miR-4769-5p	0	0	0	0	1	0	0	0	0	0	0	0	0	0	0.14502	0	0	0	0	0
hsa-miR-4771	1	0	0	0	0	0	0	0	0	0	0.17131	0	0	0	0	0	0	0	0	0
hsa-miR-4773	1	4	0	0	0	2	0	0	1	0	0.17131	0.491493	0	0	0	0.335965	0	0	0.130124	0
hsa-miR-4774-5p	0	0	0	0	0	0	0	2	0	1	0	0	0	0	0	0	0	0.243217	0	0.115511
hsa-miR-4775	7	5	2	11	3	3	11	20	3	20	1.19917	0.614366	0.288348	1.86455	0.435061	0.503947	1.67172	2.43217	0.390372	2.31023
hsa-miR-4781-3p	4	2	3	4	6	6	1	0	3	4	0.685242	0.245746	0.432522	0.678018	0.870121	1.00789	0.151975	0	0.390372	0.462046
hsa-miR-4781-5p	0	0	0	0	0	0	1	0	0	0	0	0	0	0	0	0	0.151975	0	0	0
hsa-miR-4782-3p	0	0	1	0	0	0	0	0	1	0	0	0	0.144174	0	0	0	0	0	0.130124	0
hsa-miR-4785	0	1	1	1	0	0	0	0	0	0	0	0.122873	0.144174	0.169504	0	0	0	0	0	0
hsa-miR-4786-5p	0	2	0	0	1	1	0	0	0	1	0	0.245746	0	0	0.14502	0.167982	0	0	0	0.115511
hsa-miR-4787-3p	2	21	30	6	34	7	8	12	11	8	0.342621	2.58034	4.32522	1.01703	4.93069	1.17588	1.2158	1.4593	1.43136	0.924092
hsa-miR-4788	7	0	0	0	0	0	0	0	1	1	1.19917	0	0	0	0	0	0	0	0.130124	0.115511
hsa-miR-4790-3p	0	0	1	0	0	0	0	0	0	0	0	0	0.144174	0	0	0	0	0	0	0
hsa-miR-4791	1	2	3	5	3	5	2	1	4	5	0.17131	0.245746	0.432522	0.847522	0.435061	0.839912	0.30395	0.121608	0.520496	0.577557
hsa-miR-4793-3p	0	0	1	4	0	1	0	0	1	1	0	0	0.144174	0.678018	0	0.167982	0	0	0.130124	0.115511
hsa-miR-4795-3p	0	0	0	0	0	0	0	0	1	0	0	0	0	0	0	0	0	0	0.130124	0
hsa-miR-4795-5p	0	0	0	0	2	0	0	0	0	0	0	0	0	0	0.29004	0	0	0	0	0
hsa-miR-4796-3p	0	1	4	0	2	1	0	0	0	0	0	0.122873	0.576696	0	0.29004	0.167982	0	0	0	0
hsa-miR-4796-5p	9	10	16	18	8	4	18	14	28	18	1.54179	1.22873	2.30679	3.05108	1.16016	0.67193	2.73555	1.70252	3.64347	2.07921
hsa-miR-4797-3p	4	8	6	4	6	0	3	13	4	8	0.685242	0.982986	0.865045	0.678018	0.870121	0	0.455924	1.58091	0.520496	0.924092
hsa-miR-4797-5p	0	8	5	9	4	0	2	3	3	10	0	0.982986	0.72087	1.52554	0.580081	0	0.30395	0.364825	0.390372	1.15511
hsa-miR-4798-5p	0	0	0	0	0	0	2	0	0	0	0	0	0	0	0	0	0.30395	0	0	0
hsa-miR-4799-5p	0	1	0	0	0	0	0	0	0	0	0	0.122873	0	0	0	0	0	0	0	0
hsa-miR-4802-3p	2	0	0	0	2	1	1	1	0	1	0.342621	0	0	0	0.29004	0.167982	0.151975	0.121608	0	0.115511
hsa-miR-4802-5p	0	0	0	0	0	2	0	0	0	0	0	0	0	0	0	0.335965	0	0	0	0
hsa-miR-4803	0	0	2	0	1	0	0	2	0	0	0	0	0.288348	0	0.14502	0	0	0.243217	0	0
hsa-miR-483-3p	0	0	1	6	0	0	0	3	0	0	0	0	0.144174	1.01703	0	0	0	0.364825	0	0
hsa-miR-483-5p	0	0	2	0	1	0	2	0	0	0	0	0	0.288348	0	0.14502	0	0.30395	0	0	0
hsa-miR-484	283	477	509	294	546	183	305	312	327	504	48.4809	58.6105	73.3846	49.8343	79.181	30.7408	46.3523	37.9418	42.5506	58.2178
hsa-miR-485-3p	0	1	0	0	3	0	0	0	0	1	0	0.122873	0	0	0.435061	0	0	0	0	0.115511
hsa-miR-485-5p	2	4	1	4	5	0	1	1	0	0	0.342621	0.491493	0.144174	0.678018	0.725101	0	0.151975	0.121608	0	0
hsa-miR-486-3p	682	709	569	2330	466	517	568	565	717	640	116.834	87.1171	82.0351	394.945	67.5794	86.8469	86.3217	68.7088	93.2989	73.9273
hsa-miR-486-5p	681	688	545	2312	460	500	541	533	698	593	116.662	84.5368	78.5749	391.894	66.7093	83.9912	82.2184	64.8173	90.8266	68.4983
hsa-miR-487a-3p	1	0	0	0	0	0	0	0	0	0	0.17131	0	0	0	0	0	0	0	0	0
hsa-miR-487b-3p	1	0	0	2	1	0	0	1	1	0	0.17131	0	0	0.339009	0.14502	0	0	0.121608	0.130124	0
hsa-miR-489-3p	7	3	2	4	11	2	0	1	1	4	1.19917	0.36862	0.288348	0.678018	1.59522	0.335965	0	0.121608	0.130124	0.462046
hsa-miR-490-3p	5	2	12	1	9	1	2	0	5	6	0.856552	0.245746	1.73009	0.169504	1.30518	0.167982	0.30395	0	0.65062	0.693069
hsa-miR-490-5p	0	1	1	3	1	0	3	3	0	2	0	0.122873	0.144174	0.508513	0.14502	0	0.455924	0.364825	0	0.231023
hsa-miR-491-3p	0	0	1	0	1	0	0	3	0	0	0	0	0.144174	0	0.14502	0	0	0.364825	0	0
hsa-miR-491-5p	9	13	13	13	27	5	5	15	5	18	1.54179	1.59735	1.87426	2.20356	3.91554	0.839912	0.759874	1.82413	0.65062	2.07921
hsa-miR-493-3p	18	44	25	59	9	51	38	54	25	34	3.08359	5.40642	3.60435	10.0008	1.30518	8.5671	5.77504	6.56686	3.2531	3.92739
hsa-miR-493-5p	6	6	5	27	7	2	1	1	3	9	1.02786	0.737239	0.72087	4.57662	1.01514	0.335965	0.151975	0.121608	0.390372	1.0396
hsa-miR-494-3p	2	0	3	0	3	0	0	0	3	2	0.342621	0	0.432522	0	0.435061	0	0	0	0.390372	0.231023
hsa-miR-495-3p	19	18	23	35	16	9	12	10	14	8	3.2549	2.21172	3.316	5.93265	2.32032	1.51184	1.8237	1.21608	1.82174	0.924092
hsa-miR-496	0	0	0	0	0	1	0	1	1	0	0	0	0	0	0	0.167982	0	0.121608	0.130124	0
hsa-miR-497-5p	12	13	4	4	7	12	9	4	5	13	2.05573	1.59735	0.576696	0.678018	1.01514	2.01579	1.36777	0.486434	0.65062	1.50165
hsa-miR-4999-3p	0	0	2	2	0	0	1	1	2	2	0	0	0.288348	0.339009	0	0	0.151975	0.121608	0.260248	0.231023
hsa-miR-4999-5p	5	17	8	8	3	6	11	5	10	8	0.856552	2.08885	1.15339	1.35604	0.435061	1.00789	1.67172	0.608042	1.30124	0.924092
hsa-miR-499a-5p	24	54	23	31	40	17	15	47	14	51	4.11145	6.63516	3.316	5.25464	5.80081	2.8557	2.27962	5.7156	1.82174	5.89108
hsa-miR-499b-3p	24	53	23	30	40	17	15	47	14	51	4.11145	6.51228	3.316	5.08513	5.80081	2.8557	2.27962	5.7156	1.82174	5.89108
hsa-miR-499b-5p	0	0	1	0	0	0	1	1	0	0	0	0	0.144174	0	0	0	0.151975	0.121608	0	0
hsa-miR-5000-3p	3	1	1	0	5	0	2	2	2	1	0.513931	0.122873	0.144174	0	0.725101	0	0.30395	0.243217	0.260248	0.115511
hsa-miR-5000-5p	0	0	0	0	0	0	0	0	1	0	0	0	0	0	0	0	0	0	0.130124	0
hsa-miR-5001-3p	1	0	0	0	0	0	1	4	0	0	0.17131	0	0	0	0	0	0.151975	0.486434	0	0
hsa-miR-5001-5p	0	0	1	0	2	0	0	2	4	4	0	0	0.144174	0	0.29004	0	0	0.243217	0.520496	0.462046
hsa-miR-5002-3p	0	0	0	0	0	0	1	0	0	0	0	0	0	0	0	0	0.151975	0	0	0
hsa-miR-5002-5p	2	0	0	0	1	0	4	0	2	3	0.342621	0	0	0	0.14502	0	0.607899	0	0.260248	0.346534
hsa-miR-5004-3p	0	0	0	0	2	0	2	0	0	0	0	0	0	0	0.29004	0	0.30395	0	0	0
hsa-miR-5008-5p	0	0	0	0	0	0	0	0	0	2	0	0	0	0	0	0	0	0	0	0.231023
hsa-miR-5009-5p	11	5	4	0	1	0	4	4	14	2	1.88442	0.614366	0.576696	0	0.14502	0	0.607899	0.486434	1.82174	0.231023
hsa-miR-500a-3p	127	146	214	105	155	143	134	184	134	140	21.7564	17.9395	30.8533	17.798	22.4781	24.0215	20.3646	22.376	17.4366	16.1716
hsa-miR-500a-5p	19	7	29	10	14	4	17	8	9	9	3.2549	0.860113	4.18105	1.69504	2.03028	0.67193	2.58357	0.972868	1.17112	1.0396
hsa-miR-500b-3p	1	2	1	1	0	0	1	2	5	1	0.17131	0.245746	0.144174	0.169504	0	0	0.151975	0.243217	0.65062	0.115511
hsa-miR-500b-5p	2	0	4	7	1	0	0	0	0	1	0.342621	0	0.576696	1.18653	0.14502	0	0	0	0	0.115511
hsa-miR-5010-3p	24	42	35	29	39	19	40	28	45	27	4.11145	5.16068	5.04609	4.91563	5.65579	3.19167	6.07899	3.40504	5.85558	3.11881
hsa-miR-5010-5p	1	2	1	0	1	0	0	1	2	0	0.17131	0.245746	0.144174	0	0.14502	0	0	0.121608	0.260248	0
hsa-miR-501-3p	63	80	91	56	62	60	63	43	52	60	10.7926	9.82986	13.1198	9.49225	8.99125	10.0789	9.57441	5.22917	6.76645	6.93069
hsa-miR-501-5p	9	5	12	7	18	4	10	10	6	21	1.54179	0.614366	1.73009	1.18653	2.61036	0.67193	1.51975	1.21608	0.780744	2.42574
hsa-miR-502-3p	111	131	166	93	121	89	100	137	122	117	19.0155	16.0964	23.9329	15.7639	17.5474	14.9504	15.1975	16.6604	15.8751	13.5148
hsa-miR-502-5p	0	3	4	0	2	1	3	4	0	0	0	0.36862	0.576696	0	0.29004	0.167982	0.455924	0.486434	0	0
hsa-miR-503-3p	0	0	1	3	3	2	1	3	8	0	0	0	0.144174	0.508513	0.435061	0.335965	0.151975	0.364825	1.04099	0
hsa-miR-503-5p	68	152	140	99	55	94	134	134	155	110	11.6491	18.6767	20.1844	16.7809	7.97611	15.7903	20.3646	16.2955	20.1692	12.7063
hsa-miR-504-5p	12	33	16	26	14	13	25	7	22	35	2.05573	4.05482	2.30679	4.40711	2.03028	2.18377	3.79937	0.851259	2.86273	4.0429
hsa-miR-505-3p	98	144	154	83	119	111	84	146	129	173	16.7884	17.6937	22.2028	14.0689	17.2574	18.646	12.7659	17.7548	16.786	19.9835
hsa-miR-505-5p	2	12	12	3	7	6	5	13	4	15	0.342621	1.47448	1.73009	0.508513	1.01514	1.00789	0.759874	1.58091	0.520496	1.73267
hsa-miR-506-3p	0	0	0	2	0	0	0	0	0	6	0	0	0	0.339009	0	0	0	0	0	0.693069
hsa-miR-508-3p	1	0	0	0	0	0	0	0	0	0	0.17131	0	0	0	0	0	0	0	0	0
hsa-miR-5088-5p	0	0	0	0	0	1	0	0	0	0	0	0	0	0	0	0.167982	0	0	0	0
hsa-miR-5090	0	0	0	0	0	0	0	0	3	0	0	0	0	0	0	0	0	0	0.390372	0
hsa-miR-5091	10	11	8	18	6	9	6	4	15	3	1.7131	1.35161	1.15339	3.05108	0.870121	1.51184	0.911849	0.486434	1.95186	0.346534
hsa-miR-509-3-5p	3	1	2	2	0	0	2	6	0	2	0.513931	0.122873	0.288348	0.339009	0	0	0.30395	0.729651	0	0.231023
hsa-miR-5094	0	0	2	0	0	0	0	0	1	0	0	0	0.288348	0	0	0	0	0	0.130124	0
hsa-miR-511-5p	1	4	1	9	2	0	0	0	2	7	0.17131	0.491493	0.144174	1.52554	0.29004	0	0	0	0.260248	0.80858
hsa-miR-513c-5p	0	0	0	0	0	0	0	0	0	4	0	0	0	0	0	0	0	0	0	0.462046
hsa-miR-514a-3p	9	7	11	4	8	5	7	13	11	21	1.54179	0.860113	1.58591	0.678018	1.16016	0.839912	1.06382	1.58091	1.43136	2.42574
hsa-miR-514b-5p	0	0	0	3	0	0	0	0	0	0	0	0	0	0.508513	0	0	0	0	0	0
hsa-miR-516b-5p	1	0	0	0	0	0	0	0	0	0	0.17131	0	0	0	0	0	0	0	0	0
hsa-miR-5188	5	2	3	0	0	0	3	0	1	0	0.856552	0.245746	0.432522	0	0	0	0.455924	0	0.130124	0
hsa-miR-5189-3p	0	1	0	0	0	0	0	0	0	0	0	0.122873	0	0	0	0	0	0	0	0
hsa-miR-5189-5p	0	1	1	0	0	0	0	0	0	0	0	0.122873	0.144174	0	0	0	0	0	0	0
hsa-miR-5193	1	1	4	2	2	0	1	5	1	13	0.17131	0.122873	0.576696	0.339009	0.29004	0	0.151975	0.608042	0.130124	1.50165
hsa-miR-532-3p	15	11	20	5	22	5	14	13	13	16	2.56966	1.35161	2.88348	0.847522	3.19044	0.839912	2.12765	1.58091	1.69161	1.84818
hsa-miR-532-5p	944	1396	1413	1361	1376	1132	1115	1760	1643	1411	161.717	171.531	203.718	230.695	199.548	190.156	169.452	214.031	213.794	162.987
hsa-miR-539-5p	2	4	2	0	4	0	0	2	0	0	0.342621	0.491493	0.288348	0	0.580081	0	0	0.243217	0	0
hsa-miR-542-3p	179	190	226	132	175	160	186	293	182	179	30.6646	23.3459	32.5833	22.3746	25.3785	26.8772	28.2673	35.6313	23.6826	20.6766
hsa-miR-542-5p	1	1	2	1	2	0	1	8	7	0	0.17131	0.122873	0.288348	0.169504	0.29004	0	0.151975	0.972868	0.910868	0
hsa-miR-543	5	19	7	21	20	3	5	1	16	6	0.856552	2.33459	1.00922	3.55959	2.9004	0.503947	0.759874	0.121608	2.08198	0.693069
hsa-miR-545-5p	0	1	0	0	0	0	0	1	0	0	0	0.122873	0	0	0	0	0	0.121608	0	0
hsa-miR-548a-3p	2	7	5	0	5	0	0	4	11	4	0.342621	0.860113	0.72087	0	0.725101	0	0	0.486434	1.43136	0.462046
hsa-miR-548ab	0	0	2	0	1	0	3	8	0	2	0	0	0.288348	0	0.14502	0	0.455924	0.972868	0	0.231023
hsa-miR-548ad-5p	3	2	6	0	1	3	2	2	1	1	0.513931	0.245746	0.865045	0	0.14502	0.503947	0.30395	0.243217	0.130124	0.115511
hsa-miR-548ag	0	0	0	0	0	0	0	0	3	0	0	0	0	0	0	0	0	0	0.390372	0
hsa-miR-548ah-3p	41	71	63	38	49	46	53	66	98	93	7.02373	8.724	9.08297	6.44117	7.10599	7.72719	8.05466	8.02616	12.7522	10.7426
hsa-miR-548ak	2	0	0	0	0	0	0	0	0	0	0.342621	0	0	0	0	0	0	0	0	0
hsa-miR-548al	0	0	0	0	0	0	0	1	0	0	0	0	0	0	0	0	0	0.121608	0	0
hsa-miR-548am-3p	1	2	6	8	11	6	11	12	10	8	0.17131	0.245746	0.865045	1.35604	1.59522	1.00789	1.67172	1.4593	1.30124	0.924092
hsa-miR-548an	0	0	1	0	0	0	0	0	0	0	0	0	0.144174	0	0	0	0	0	0	0
hsa-miR-548ao-3p	2	2	4	3	2	0	5	6	6	2	0.342621	0.245746	0.576696	0.508513	0.29004	0	0.759874	0.729651	0.780744	0.231023
hsa-miR-548ap-3p	2	0	5	0	3	1	2	3	3	2	0.342621	0	0.72087	0	0.435061	0.167982	0.30395	0.364825	0.390372	0.231023
hsa-miR-548ap-5p	0	0	1	0	0	0	0	0	0	0	0	0	0.144174	0	0	0	0	0	0	0
hsa-miR-548aq-3p	16	17	27	21	14	7	28	33	21	34	2.74097	2.08885	3.8927	3.55959	2.03028	1.17588	4.25529	4.01308	2.73261	3.92739
hsa-miR-548aq-5p	1	0	0	0	0	0	0	0	0	0	0.17131	0	0	0	0	0	0	0	0	0
hsa-miR-548ar-3p	17	25	20	23	21	15	29	16	33	36	2.91228	3.07183	2.88348	3.8986	3.04542	2.51974	4.40727	1.94574	4.29409	4.15841
hsa-miR-548at-3p	0	0	0	0	2	0	0	0	0	0	0	0	0	0	0.29004	0	0	0	0	0
hsa-miR-548au-5p	0	0	0	0	1	0	0	2	0	0	0	0	0	0	0.14502	0	0	0.243217	0	0
hsa-miR-548av-3p	7	4	3	5	1	12	4	12	13	17	1.19917	0.491493	0.432522	0.847522	0.14502	2.01579	0.607899	1.4593	1.69161	1.96369
hsa-miR-548aw	0	0	0	0	0	0	1	0	0	0	0	0	0	0	0	0	0.151975	0	0	0
hsa-miR-548ay-3p	1	1	1	0	1	0	1	0	8	2	0.17131	0.122873	0.144174	0	0.14502	0	0.151975	0	1.04099	0.231023
hsa-miR-548az-3p	0	0	0	0	2	3	1	0	0	0	0	0	0	0	0.29004	0.503947	0.151975	0	0	0
hsa-miR-548az-5p	4	6	2	2	2	6	13	7	6	3	0.685242	0.737239	0.288348	0.339009	0.29004	1.00789	1.97567	0.851259	0.780744	0.346534
hsa-miR-548b-5p	0	2	3	0	0	0	0	0	0	0	0	0.245746	0.432522	0	0	0	0	0	0	0
hsa-miR-548ba	0	0	2	0	0	0	0	2	0	0	0	0	0.288348	0	0	0	0	0.243217	0	0
hsa-miR-548bc	41	33	49	42	24	35	46	80	72	51	7.02373	4.05482	7.06453	7.11918	3.48048	5.87938	6.99084	9.72868	9.36893	5.89108
hsa-miR-548c-5p	0	0	0	0	0	0	0	2	0	0	0	0	0	0	0	0	0	0.243217	0	0
hsa-miR-548d-5p	3	9	11	2	5	6	5	3	9	5	0.513931	1.10586	1.58591	0.339009	0.725101	1.00789	0.759874	0.364825	1.17112	0.577557
hsa-miR-548e-3p	47	43	35	12	32	20	42	30	42	32	8.05159	5.28355	5.04609	2.03405	4.64065	3.35965	6.38294	3.64825	5.46521	3.69637
hsa-miR-548f-3p	29	54	42	29	31	45	62	64	71	81	4.968	6.63516	6.05531	4.91563	4.49563	7.55921	9.42244	7.78294	9.23881	9.35643
hsa-miR-548f-5p	37	33	49	42	24	35	45	80	72	51	6.33849	4.05482	7.06453	7.11918	3.48048	5.87938	6.83887	9.72868	9.36893	5.89108
hsa-miR-548g-5p	16	17	27	21	14	7	28	33	21	34	2.74097	2.08885	3.8927	3.55959	2.03028	1.17588	4.25529	4.01308	2.73261	3.92739
hsa-miR-548h-3p	1	0	0	0	0	0	0	2	0	0	0.17131	0	0	0	0	0	0	0.243217	0	0
hsa-miR-548h-5p	22	21	26	16	31	8	19	28	20	22	3.76883	2.58034	3.74853	2.71207	4.49563	1.34386	2.88752	3.40504	2.60248	2.54125
hsa-miR-548j-3p	3	2	4	0	4	8	11	10	4	9	0.513931	0.245746	0.576696	0	0.580081	1.34386	1.67172	1.21608	0.520496	1.0396
hsa-miR-548j-5p	4	13	8	7	8	5	5	6	6	7	0.685242	1.59735	1.15339	1.18653	1.16016	0.839912	0.759874	0.729651	0.780744	0.80858
hsa-miR-548k	16	5	25	15	10	9	10	12	14	13	2.74097	0.614366	3.60435	2.54257	1.4502	1.51184	1.51975	1.4593	1.82174	1.50165
hsa-miR-548l	8	8	5	1	11	0	12	14	8	14	1.37048	0.982986	0.72087	0.169504	1.59522	0	1.8237	1.70252	1.04099	1.61716
hsa-miR-548n	21	10	8	8	8	13	13	16	6	10	3.59752	1.22873	1.15339	1.35604	1.16016	2.18377	1.97567	1.94574	0.780744	1.15511
hsa-miR-548o-3p	1617	2181	2051	1519	1392	2060	2031	2237	2948	2480	277.009	267.987	295.701	257.477	201.868	346.044	308.661	272.038	383.606	286.468
hsa-miR-548p	41	71	63	38	53	46	59	67	100	93	7.02373	8.724	9.08297	6.44117	7.68607	7.72719	8.96651	8.14777	13.0124	10.7426
hsa-miR-548q	0	3	2	0	0	1	2	2	0	1	0	0.36862	0.288348	0	0	0.167982	0.30395	0.243217	0	0.115511
hsa-miR-548s	3	2	7	0	3	2	1	4	0	1	0.513931	0.245746	1.00922	0	0.435061	0.335965	0.151975	0.486434	0	0.115511
hsa-miR-548t-3p	5	1	5	0	3	2	2	10	3	8	0.856552	0.122873	0.72087	0	0.435061	0.335965	0.30395	1.21608	0.390372	0.924092
hsa-miR-548t-5p	0	0	0	0	0	0	0	1	0	0	0	0	0	0	0	0	0	0.121608	0	0
hsa-miR-548u	46	68	67	64	54	55	64	75	113	102	7.88028	8.35538	9.65966	10.8483	7.83109	9.23903	9.72639	9.12064	14.704	11.7822
hsa-miR-548w	2	2	0	0	7	2	0	1	0	0	0.342621	0.245746	0	0	1.01514	0.335965	0	0.121608	0	0
hsa-miR-549a-3p	0	0	0	4	2	0	0	0	0	0	0	0	0	0.678018	0.29004	0	0	0	0	0
hsa-miR-549a-5p	0	0	0	4	2	0	0	0	0	0	0	0	0	0.678018	0.29004	0	0	0	0	0
hsa-miR-550a-3-5p	23	62	61	84	49	44	46	59	56	48	3.94014	7.61814	8.79462	14.2384	7.10599	7.39123	6.99084	7.1749	7.28695	5.54455
hsa-miR-550a-3p	3	0	1	3	2	2	0	2	0	2	0.513931	0	0.144174	0.508513	0.29004	0.335965	0	0.243217	0	0.231023
hsa-miR-550a-5p	23	62	61	84	49	44	46	59	56	48	3.94014	7.61814	8.79462	14.2384	7.10599	7.39123	6.99084	7.1749	7.28695	5.54455
hsa-miR-550b-2-5p	3	0	1	3	2	2	0	2	0	2	0.513931	0	0.144174	0.508513	0.29004	0.335965	0	0.243217	0	0.231023
hsa-miR-550b-3p	15	31	29	42	27	25	22	29	22	17	2.56966	3.80907	4.18105	7.11918	3.91554	4.19956	3.34345	3.52665	2.86273	1.96369
hsa-miR-551a	0	0	0	1	0	0	0	1	0	0	0	0	0	0.169504	0	0	0	0.121608	0	0
hsa-miR-551b-3p	0	2	0	0	0	0	0	0	0	0	0	0.245746	0	0	0	0	0	0	0	0
hsa-miR-551b-5p	0	17	2	1	2	0	0	0	0	0	0	2.08885	0.288348	0.169504	0.29004	0	0	0	0	0
hsa-miR-552-3p	2	0	0	0	0	0	1	0	4	0	0.342621	0	0	0	0	0	0.151975	0	0.520496	0
hsa-miR-556-3p	1	1	0	0	5	0	0	2	0	2	0.17131	0.122873	0	0	0.725101	0	0	0.243217	0	0.231023
hsa-miR-556-5p	17	19	25	27	20	18	22	13	25	28	2.91228	2.33459	3.60435	4.57662	2.9004	3.02368	3.34345	1.58091	3.2531	3.23432
hsa-miR-5579-3p	0	4	1	2	1	2	2	8	0	14	0	0.491493	0.144174	0.339009	0.14502	0.335965	0.30395	0.972868	0	1.61716
hsa-miR-5579-5p	1	1	1	3	3	1	1	3	1	3	0.17131	0.122873	0.144174	0.508513	0.435061	0.167982	0.151975	0.364825	0.130124	0.346534
hsa-miR-5581-3p	4	1	8	0	0	0	2	2	3	0	0.685242	0.122873	1.15339	0	0	0	0.30395	0.243217	0.390372	0
hsa-miR-5582-3p	0	0	2	0	0	0	0	0	0	0	0	0	0.288348	0	0	0	0	0	0	0
hsa-miR-5584-3p	0	0	3	0	0	0	0	0	0	0	0	0	0.432522	0	0	0	0	0	0	0
hsa-miR-5585-3p	0	0	3	0	0	0	0	1	1	1	0	0	0.432522	0	0	0	0	0.121608	0.130124	0.115511
hsa-miR-5587-3p	2	0	3	1	1	0	1	2	0	1	0.342621	0	0.432522	0.169504	0.14502	0	0.151975	0.243217	0	0.115511
hsa-miR-5588-5p	0	0	0	0	0	3	1	0	0	0	0	0	0	0	0	0.503947	0.151975	0	0	0
hsa-miR-561-5p	1	0	0	2	0	3	0	3	0	2	0.17131	0	0	0.339009	0	0.503947	0	0.364825	0	0.231023
hsa-miR-5680	0	2	11	0	0	6	1	0	0	0	0	0.245746	1.58591	0	0	1.00789	0.151975	0	0	0
hsa-miR-5689	0	0	0	1	1	0	0	0	0	0	0	0	0	0.169504	0.14502	0	0	0	0	0
hsa-miR-5690	4	15	8	1	2	6	8	12	8	12	0.685242	1.8431	1.15339	0.169504	0.29004	1.00789	1.2158	1.4593	1.04099	1.38614
hsa-miR-5693	0	0	1	0	0	1	0	0	0	0	0	0	0.144174	0	0	0.167982	0	0	0	0
hsa-miR-5695	0	2	1	3	0	0	3	2	3	4	0	0.245746	0.144174	0.508513	0	0	0.455924	0.243217	0.390372	0.462046
hsa-miR-5696	1	3	1	0	4	0	0	1	0	1	0.17131	0.36862	0.144174	0	0.580081	0	0	0.121608	0	0.115511
hsa-miR-5697	0	2	0	0	0	0	1	0	0	3	0	0.245746	0	0	0	0	0.151975	0	0	0.346534
hsa-miR-5698	0	0	2	0	2	0	0	0	0	0	0	0	0.288348	0	0.29004	0	0	0	0	0
hsa-miR-5699-3p	0	1	5	4	2	4	4	3	8	4	0	0.122873	0.72087	0.678018	0.29004	0.67193	0.607899	0.364825	1.04099	0.462046
hsa-miR-5699-5p	2	0	5	4	1	0	0	2	0	6	0.342621	0	0.72087	0.678018	0.14502	0	0	0.243217	0	0.693069
hsa-miR-570-3p	0	1	0	0	0	0	0	0	0	0	0	0.122873	0	0	0	0	0	0	0	0
hsa-miR-5708	1	0	1	0	0	0	0	0	0	0	0.17131	0	0.144174	0	0	0	0	0	0	0
hsa-miR-573	0	0	0	0	1	0	0	4	0	2	0	0	0	0	0.14502	0	0	0.486434	0	0.231023
hsa-miR-574-3p	1265	1257	1716	1239	1549	1133	2146	1670	1713	2582	216.708	154.452	247.403	210.016	224.636	190.324	326.138	203.086	222.903	298.251
hsa-miR-574-5p	774	879	1332	630	1339	538	757	1007	612	1082	132.594	108.006	192.04	106.788	194.182	90.3745	115.045	122.46	79.6359	124.983
hsa-miR-576-3p	634	952	578	388	558	580	665	617	795	938	108.611	116.975	83.3326	65.7677	80.9213	97.4298	101.063	75.0324	103.449	108.35
hsa-miR-576-5p	38	70	104	80	108	52	83	128	77	86	6.5098	8.60113	14.9941	13.5604	15.6622	8.73508	12.6139	15.5659	10.0196	9.93399
hsa-miR-577	8	1	9	3	11	2	10	2	2	11	1.37048	0.122873	1.29757	0.508513	1.59522	0.335965	1.51975	0.243217	0.260248	1.27063
hsa-miR-578	2	9	8	7	8	27	19	12	16	16	0.342621	1.10586	1.15339	1.18653	1.16016	4.53552	2.88752	1.4593	2.08198	1.84818
hsa-miR-579-3p	0	0	0	0	2	0	0	0	0	0	0	0	0	0	0.29004	0	0	0	0	0
hsa-miR-579-5p	1	5	0	3	4	2	2	5	0	0	0.17131	0.614366	0	0.508513	0.580081	0.335965	0.30395	0.608042	0	0
hsa-miR-580-3p	0	1	1	1	1	3	3	1	0	0	0	0.122873	0.144174	0.169504	0.14502	0.503947	0.455924	0.121608	0	0
hsa-miR-581	50	51	29	37	25	25	31	32	42	34	8.56552	6.26654	4.18105	6.27166	3.6255	4.19956	4.71122	3.89147	5.46521	3.92739
hsa-miR-582-3p	1088	1722	1293	1511	1147	1968	2049	2580	2397	1874	186.386	211.588	186.417	256.121	166.338	330.589	311.396	313.75	311.907	216.468
hsa-miR-582-5p	13	13	10	3	25	4	10	21	15	16	2.22704	1.59735	1.44174	0.508513	3.6255	0.67193	1.51975	2.55378	1.95186	1.84818
hsa-miR-583	1	1	0	0	2	0	0	0	1	0	0.17131	0.122873	0	0	0.29004	0	0	0	0.130124	0
hsa-miR-584-3p	0	0	0	0	2	0	0	1	0	1	0	0	0	0	0.29004	0	0	0.121608	0	0.115511
hsa-miR-584-5p	170	211	202	185	157	168	215	165	203	171	29.1228	25.9263	29.1232	31.3583	22.7682	28.221	32.6746	20.0654	26.4152	19.7525
hsa-miR-585-3p	25	34	45	23	54	17	19	42	25	45	4.28276	4.17769	6.48783	3.8986	7.83109	2.8557	2.88752	5.10756	3.2531	5.19802
hsa-miR-585-5p	0	0	1	0	0	0	1	0	0	0	0	0	0.144174	0	0	0	0.151975	0	0	0
hsa-miR-586	1	1	0	1	0	0	0	0	0	1	0.17131	0.122873	0	0.169504	0	0	0	0	0	0.115511
hsa-miR-588	0	1	2	0	0	0	0	0	0	0	0	0.122873	0.288348	0	0	0	0	0	0	0
hsa-miR-589-3p	1	0	1	0	1	1	1	0	0	0	0.17131	0	0.144174	0	0.14502	0.167982	0.151975	0	0	0
hsa-miR-589-5p	1124	1975	1606	1453	1140	1997	1983	2349	2722	1743	192.553	242.675	231.544	246.29	165.323	335.461	301.366	285.658	354.198	201.336
hsa-miR-590-3p	19	12	27	16	30	20	19	31	1	18	3.2549	1.47448	3.8927	2.71207	4.35061	3.35965	2.88752	3.76986	0.130124	2.07921
hsa-miR-590-5p	0	3	0	0	0	0	0	0	0	0	0	0.36862	0	0	0	0	0	0	0	0
hsa-miR-592	0	1	4	0	0	0	0	0	1	6	0	0.122873	0.576696	0	0	0	0	0	0.130124	0.693069
hsa-miR-597-3p	25	57	34	47	55	28	38	47	70	68	4.28276	7.00378	4.90192	7.96671	7.97611	4.70351	5.77504	5.7156	9.10868	7.85478
hsa-miR-598-3p	80	76	125	55	128	30	79	102	50	47	13.7048	9.33837	18.0218	9.32274	18.5626	5.03947	12.006	12.4041	6.5062	5.42904
hsa-miR-598-5p	1	8	3	0	7	0	1	0	0	1	0.17131	0.982986	0.432522	0	1.01514	0	0.151975	0	0	0.115511
hsa-miR-607	0	1	1	0	0	0	0	0	4	6	0	0.122873	0.144174	0	0	0	0	0	0.520496	0.693069
hsa-miR-610	0	0	0	0	0	1	0	1	0	0	0	0	0	0	0	0.167982	0	0.121608	0	0
hsa-miR-612	0	0	0	0	0	0	0	0	0	3	0	0	0	0	0	0	0	0	0	0.346534
hsa-miR-6132	0	0	0	0	0	1	0	0	0	0	0	0	0	0	0	0.167982	0	0	0	0
hsa-miR-615-3p	2116	4595	3658	5724	4511	2825	3673	3599	5337	5464	362.493	564.603	527.389	970.243	654.186	474.55	558.203	437.669	694.472	631.155
hsa-miR-615-5p	10	14	22	28	31	19	11	5	15	24	1.7131	1.72023	3.17183	4.74612	4.49563	3.19167	1.67172	0.608042	1.95186	2.77228
hsa-miR-616-3p	0	0	2	0	0	0	0	1	2	3	0	0	0.288348	0	0	0	0	0.121608	0.260248	0.346534
hsa-miR-616-5p	3	0	4	3	2	0	0	3	0	0	0.513931	0	0.576696	0.508513	0.29004	0	0	0.364825	0	0
hsa-miR-618	42	72	59	40	71	56	55	74	66	102	7.19504	8.84687	8.50627	6.78018	10.2964	9.40701	8.35861	8.99903	8.58819	11.7822
hsa-miR-619-5p	1	4	14	2	11	1	9	7	7	7	0.17131	0.491493	2.01844	0.339009	1.59522	0.167982	1.36777	0.851259	0.910868	0.80858
hsa-miR-624-5p	0	0	0	5	4	0	1	3	6	1	0	0	0	0.847522	0.580081	0	0.151975	0.364825	0.780744	0.115511
hsa-miR-625-3p	923	1651	1017	1161	1327	1012	1176	1235	1493	1728	158.12	202.864	146.625	196.795	192.442	169.998	178.722	150.186	194.275	199.604
hsa-miR-625-5p	312	326	331	253	292	273	335	277	353	441	53.4489	40.0567	47.7216	42.8846	42.3459	45.8592	50.9116	33.6856	45.9338	50.9406
hsa-miR-627-3p	2	0	0	1	1	2	2	2	0	2	0.342621	0	0	0.169504	0.14502	0.335965	0.30395	0.243217	0	0.231023
hsa-miR-627-5p	0	0	1	0	1	0	0	0	0	0	0	0	0.144174	0	0.14502	0	0	0	0	0
hsa-miR-628-3p	8	3	1	1	6	4	4	0	2	5	1.37048	0.36862	0.144174	0.169504	0.870121	0.67193	0.607899	0	0.260248	0.577557
hsa-miR-628-5p	16	41	27	21	37	12	16	20	16	35	2.74097	5.0378	3.8927	3.55959	5.36575	2.01579	2.4316	2.43217	2.08198	4.0429
hsa-miR-629-3p	6	3	7	4	2	0	0	6	7	3	1.02786	0.36862	1.00922	0.678018	0.29004	0	0	0.729651	0.910868	0.346534
hsa-miR-629-5p	253	427	427	288	366	227	234	385	286	318	43.3416	52.4669	61.5623	48.8173	53.0774	38.132	35.5621	46.8193	37.2155	36.7326
hsa-miR-632	0	0	1	0	0	0	0	0	0	0	0	0	0.144174	0	0	0	0	0	0	0
hsa-miR-636	1	2	1	0	2	0	0	1	0	0	0.17131	0.245746	0.144174	0	0.29004	0	0	0.121608	0	0
hsa-miR-638	0	0	0	0	2	0	0	0	0	0	0	0	0	0	0.29004	0	0	0	0	0
hsa-miR-641	132	181	142	125	214	105	131	177	150	245	22.613	22.2401	20.4727	21.188	31.0343	17.6382	19.9087	21.5247	19.5186	28.3003
hsa-miR-642a-3p	9	17	7	5	8	8	18	10	21	10	1.54179	2.08885	1.00922	0.847522	1.16016	1.34386	2.73555	1.21608	2.73261	1.15511
hsa-miR-642a-5p	5	3	1	2	6	1	1	4	4	9	0.856552	0.36862	0.144174	0.339009	0.870121	0.167982	0.151975	0.486434	0.520496	1.0396
hsa-miR-642b-3p	5	3	1	2	6	1	1	4	4	9	0.856552	0.36862	0.144174	0.339009	0.870121	0.167982	0.151975	0.486434	0.520496	1.0396
hsa-miR-642b-5p	9	17	7	5	8	8	19	10	21	10	1.54179	2.08885	1.00922	0.847522	1.16016	1.34386	2.88752	1.21608	2.73261	1.15511
hsa-miR-643	1	0	2	2	0	0	1	1	0	2	0.17131	0	0.288348	0.339009	0	0	0.151975	0.121608	0	0.231023
hsa-miR-6500-3p	8	16	14	16	18	9	11	14	11	11	1.37048	1.96597	2.01844	2.71207	2.61036	1.51184	1.67172	1.70252	1.43136	1.27063
hsa-miR-6501-5p	0	0	0	0	0	0	0	0	1	0	0	0	0	0	0	0	0	0	0.130124	0
hsa-miR-6503-3p	0	0	0	2	0	0	0	0	0	1	0	0	0	0.339009	0	0	0	0	0	0.115511
hsa-miR-6505-3p	2	2	6	5	1	1	0	3	1	8	0.342621	0.245746	0.865045	0.847522	0.14502	0.167982	0	0.364825	0.130124	0.924092
hsa-miR-6505-5p	2	5	3	6	9	4	3	5	12	1	0.342621	0.614366	0.432522	1.01703	1.30518	0.67193	0.455924	0.608042	1.56149	0.115511
hsa-miR-6508-3p	0	0	0	0	0	2	0	0	2	0	0	0	0	0	0	0.335965	0	0	0.260248	0
hsa-miR-6509-3p	0	3	5	2	0	0	4	3	0	2	0	0.36862	0.72087	0.339009	0	0	0.607899	0.364825	0	0.231023
hsa-miR-6509-5p	0	7	6	0	5	4	8	3	6	1	0	0.860113	0.865045	0	0.725101	0.67193	1.2158	0.364825	0.780744	0.115511
hsa-miR-6510-3p	0	2	3	0	0	1	1	1	0	3	0	0.245746	0.432522	0	0	0.167982	0.151975	0.121608	0	0.346534
hsa-miR-6511a-3p	1	2	4	0	1	1	2	2	0	3	0.17131	0.245746	0.576696	0	0.14502	0.167982	0.30395	0.243217	0	0.346534
hsa-miR-6511a-5p	0	2	2	0	2	0	0	0	0	0	0	0.245746	0.288348	0	0.29004	0	0	0	0	0
hsa-miR-6511b-3p	0	5	1	3	7	2	4	4	0	1	0	0.614366	0.144174	0.508513	1.01514	0.335965	0.607899	0.486434	0	0.115511
hsa-miR-6511b-5p	0	2	2	1	4	0	3	0	0	0	0	0.245746	0.288348	0.169504	0.580081	0	0.455924	0	0	0
hsa-miR-6512-5p	0	0	0	0	0	1	1	3	1	0	0	0	0	0	0	0.167982	0.151975	0.364825	0.130124	0
hsa-miR-6513-3p	0	3	0	0	2	0	0	0	2	3	0	0.36862	0	0	0.29004	0	0	0	0.260248	0.346534
hsa-miR-6513-5p	0	1	4	0	0	0	0	1	0	0	0	0.122873	0.576696	0	0	0	0	0.121608	0	0
hsa-miR-6514-3p	0	0	0	1	0	0	2	0	0	0	0	0	0	0.169504	0	0	0.30395	0	0	0
hsa-miR-6514-5p	0	1	1	1	4	5	3	2	8	4	0	0.122873	0.144174	0.169504	0.580081	0.839912	0.455924	0.243217	1.04099	0.462046
hsa-miR-6515-5p	6	11	18	10	13	4	14	12	15	15	1.02786	1.35161	2.59513	1.69504	1.88526	0.67193	2.12765	1.4593	1.95186	1.73267
hsa-miR-651-5p	139	128	150	95	109	79	133	170	101	156	23.8122	15.7278	21.6261	16.1029	15.8072	13.2706	20.2126	20.6734	13.1425	18.0198
hsa-miR-6516-3p	0	0	2	1	8	2	1	3	0	1	0	0	0.288348	0.169504	1.16016	0.335965	0.151975	0.364825	0	0.115511
hsa-miR-6516-5p	6	18	16	8	9	5	11	12	7	7	1.02786	2.21172	2.30679	1.35604	1.30518	0.839912	1.67172	1.4593	0.910868	0.80858
hsa-miR-652-3p	39	77	107	102	107	35	50	75	34	64	6.68111	9.46124	15.4266	17.2894	15.5172	5.87938	7.59874	9.12064	4.42422	7.39273
hsa-miR-652-5p	12	6	19	7	19	12	26	18	15	6	2.05573	0.737239	2.73931	1.18653	2.75538	2.01579	3.95134	2.18895	1.95186	0.693069
hsa-miR-6529-5p	0	0	4	1	0	2	0	0	0	0	0	0	0.576696	0.169504	0	0.335965	0	0	0	0
hsa-miR-653-3p	0	0	4	3	3	0	0	9	3	1	0	0	0.576696	0.508513	0.435061	0	0	1.09448	0.390372	0.115511
hsa-miR-653-5p	55	63	57	42	68	20	27	42	29	39	9.42208	7.74101	8.21792	7.11918	9.86137	3.35965	4.10332	5.10756	3.7736	4.50495
hsa-miR-654-3p	10	12	17	27	10	3	3	6	2	9	1.7131	1.47448	2.45096	4.57662	1.4502	0.503947	0.455924	0.729651	0.260248	1.0396
hsa-miR-654-5p	0	6	5	3	0	3	1	2	2	3	0	0.737239	0.72087	0.508513	0	0.503947	0.151975	0.243217	0.260248	0.346534
hsa-miR-655-3p	0	0	2	1	0	0	0	0	0	0	0	0	0.288348	0.169504	0	0	0	0	0	0
hsa-miR-656-3p	0	0	0	0	0	0	0	3	0	0	0	0	0	0	0	0	0	0.364825	0	0
hsa-miR-659-3p	1	0	0	0	2	0	0	0	0	0	0.17131	0	0	0	0.29004	0	0	0	0	0
hsa-miR-659-5p	174	236	234	266	165	348	287	335	405	244	29.808	28.9981	33.7367	45.0882	23.9283	58.4579	43.6168	40.7388	52.7002	28.1848
hsa-miR-660-5p	38	52	56	39	78	27	59	53	72	66	6.5098	6.38941	8.07375	6.61067	11.3116	4.53552	8.96651	6.44525	9.36893	7.62376
hsa-miR-664a-3p	159	210	253	64	241	140	192	194	234	184	27.2384	25.8034	36.476	10.8483	34.9499	23.5175	29.1792	23.592	30.449	21.2541
hsa-miR-664a-5p	26	44	69	29	62	13	41	41	35	57	4.45407	5.40642	9.94801	4.91563	8.99125	2.18377	6.23097	4.98595	4.55434	6.58415
hsa-miR-664b-3p	2	2	7	1	0	1	2	3	3	1	0.342621	0.245746	1.00922	0.169504	0	0.167982	0.30395	0.364825	0.390372	0.115511
hsa-miR-664b-5p	1	3	2	0	2	0	2	2	0	7	0.17131	0.36862	0.288348	0	0.29004	0	0.30395	0.243217	0	0.80858
hsa-miR-671-3p	312	504	462	749	433	417	496	440	770	746	53.4489	61.9281	66.6084	126.959	62.7937	70.0487	75.3795	53.5077	100.196	86.1716
hsa-miR-6715b-3p	0	0	0	0	0	0	2	0	0	0	0	0	0	0	0	0	0.30395	0	0	0
hsa-miR-671-5p	84	129	141	65	181	41	65	99	67	100	14.3901	15.8506	20.3285	11.0178	26.2487	6.88728	9.87836	12.0392	8.71831	11.5511
hsa-miR-6716-3p	27	69	25	55	25	43	55	42	52	46	4.62538	8.47825	3.60435	9.32274	3.6255	7.22324	8.35861	5.10756	6.76645	5.31353
hsa-miR-6718-5p	0	0	1	0	0	1	0	0	0	0	0	0	0.144174	0	0	0.167982	0	0	0	0
hsa-miR-6720-3p	0	0	0	1	0	0	0	1	0	0	0	0	0	0.169504	0	0	0	0.121608	0	0
hsa-miR-6721-5p	0	0	2	0	6	0	2	0	5	0	0	0	0.288348	0	0.870121	0	0.30395	0	0.65062	0
hsa-miR-6724-5p	0	4	9	1	1	0	1	1	1	5	0	0.491493	1.29757	0.169504	0.14502	0	0.151975	0.121608	0.130124	0.577557
hsa-miR-6726-3p	0	0	1	1	1	2	5	3	6	5	0	0	0.144174	0.169504	0.14502	0.335965	0.759874	0.364825	0.780744	0.577557
hsa-miR-6726-5p	0	0	0	0	0	0	0	0	0	1	0	0	0	0	0	0	0	0	0	0.115511
hsa-miR-6727-5p	0	0	0	0	0	1	0	0	0	0	0	0	0	0	0	0.167982	0	0	0	0
hsa-miR-6728-5p	0	0	0	0	1	0	0	0	0	0	0	0	0	0	0.14502	0	0	0	0	0
hsa-miR-6729-5p	0	0	0	0	0	0	1	0	0	2	0	0	0	0	0	0	0.151975	0	0	0.231023
hsa-miR-6730-3p	0	0	0	0	0	0	2	0	0	0	0	0	0	0	0	0	0.30395	0	0	0
hsa-miR-6730-5p	2	0	0	0	1	0	0	0	2	0	0.342621	0	0	0	0.14502	0	0	0	0.260248	0
hsa-miR-6732-3p	0	2	0	0	0	0	0	0	0	2	0	0.245746	0	0	0	0	0	0	0	0.231023
hsa-miR-6733-5p	0	0	3	3	0	7	1	2	6	14	0	0	0.432522	0.508513	0	1.17588	0.151975	0.243217	0.780744	1.61716
hsa-miR-6734-3p	0	0	0	0	0	0	0	0	0	1	0	0	0	0	0	0	0	0	0	0.115511
hsa-miR-6734-5p	1	0	1	0	0	0	2	0	4	0	0.17131	0	0.144174	0	0	0	0.30395	0	0.520496	0
hsa-miR-6735-3p	0	0	2	2	0	1	0	0	0	0	0	0	0.288348	0.339009	0	0.167982	0	0	0	0
hsa-miR-6735-5p	0	5	0	0	1	0	1	3	1	0	0	0.614366	0	0	0.14502	0	0.151975	0.364825	0.130124	0
hsa-miR-6736-3p	0	2	0	0	0	0	0	0	0	0	0	0.245746	0	0	0	0	0	0	0	0
hsa-miR-6736-5p	4	0	1	0	1	1	0	0	0	0	0.685242	0	0.144174	0	0.14502	0.167982	0	0	0	0
hsa-miR-6737-3p	0	2	0	0	0	0	0	0	0	0	0	0.245746	0	0	0	0	0	0	0	0
hsa-miR-6737-5p	0	0	0	0	2	0	0	0	0	0	0	0	0	0	0.29004	0	0	0	0	0
hsa-miR-6738-3p	0	0	0	0	0	0	0	0	3	0	0	0	0	0	0	0	0	0	0.390372	0
hsa-miR-6739-5p	1	0	0	0	0	0	0	0	1	0	0.17131	0	0	0	0	0	0	0	0.130124	0
hsa-miR-6740-3p	0	1	0	0	0	0	0	0	0	0	0	0.122873	0	0	0	0	0	0	0	0
hsa-miR-6740-5p	0	0	0	0	0	3	0	0	0	0	0	0	0	0	0	0.503947	0	0	0	0
hsa-miR-6741-3p	4	1	1	3	5	0	9	3	5	3	0.685242	0.122873	0.144174	0.508513	0.725101	0	1.36777	0.364825	0.65062	0.346534
hsa-miR-6741-5p	0	0	0	0	1	0	0	0	0	0	0	0	0	0	0.14502	0	0	0	0	0
hsa-miR-6743-3p	6	1	0	0	1	0	2	2	2	1	1.02786	0.122873	0	0	0.14502	0	0.30395	0.243217	0.260248	0.115511
hsa-miR-6745	0	0	0	1	0	0	0	0	0	0	0	0	0	0.169504	0	0	0	0	0	0
hsa-miR-6746-3p	0	1	1	0	0	0	0	0	0	0	0	0.122873	0.144174	0	0	0	0	0	0	0
hsa-miR-6746-5p	0	0	1	0	1	0	0	0	0	0	0	0	0.144174	0	0.14502	0	0	0	0	0
hsa-miR-6747-3p	0	1	0	4	1	0	0	0	0	3	0	0.122873	0	0.678018	0.14502	0	0	0	0	0.346534
hsa-miR-6751-3p	0	0	3	0	3	0	0	0	0	0	0	0	0.432522	0	0.435061	0	0	0	0	0
hsa-miR-6751-5p	0	0	0	1	0	0	0	0	0	0	0	0	0	0.169504	0	0	0	0	0	0
hsa-miR-6753-3p	0	2	3	11	7	4	1	6	6	2	0	0.245746	0.432522	1.86455	1.01514	0.67193	0.151975	0.729651	0.780744	0.231023
hsa-miR-6754-5p	0	0	0	0	0	0	1	0	0	0	0	0	0	0	0	0	0.151975	0	0	0
hsa-miR-6755-5p	3	2	0	0	0	0	5	0	0	0	0.513931	0.245746	0	0	0	0	0.759874	0	0	0
hsa-miR-6756-3p	0	2	3	0	0	0	0	0	6	0	0	0.245746	0.432522	0	0	0	0	0	0.780744	0
hsa-miR-6758-3p	0	0	0	0	0	1	0	0	0	0	0	0	0	0	0	0.167982	0	0	0	0
hsa-miR-6758-5p	2	0	2	0	0	0	0	0	0	0	0.342621	0	0.288348	0	0	0	0	0	0	0
hsa-miR-6761-5p	0	0	0	0	2	2	1	0	3	0	0	0	0	0	0.29004	0.335965	0.151975	0	0.390372	0
hsa-miR-6762-3p	3	3	8	4	7	2	0	11	4	5	0.513931	0.36862	1.15339	0.678018	1.01514	0.335965	0	1.33769	0.520496	0.577557
hsa-miR-6762-5p	3	0	0	3	0	0	0	2	0	0	0.513931	0	0	0.508513	0	0	0	0.243217	0	0
hsa-miR-6763-5p	0	0	5	0	0	0	0	0	1	1	0	0	0.72087	0	0	0	0	0	0.130124	0.115511
hsa-miR-676-3p	2	1	0	0	3	1	3	2	1	0	0.342621	0.122873	0	0	0.435061	0.167982	0.455924	0.243217	0.130124	0
hsa-miR-6764-3p	0	0	0	0	0	0	0	2	0	0	0	0	0	0	0	0	0	0.243217	0	0
hsa-miR-6764-5p	0	1	0	0	0	0	0	2	0	5	0	0.122873	0	0	0	0	0	0.243217	0	0.577557
hsa-miR-6766-5p	0	0	0	2	6	3	1	2	9	6	0	0	0	0.339009	0.870121	0.503947	0.151975	0.243217	1.17112	0.693069
hsa-miR-6767-5p	0	1	0	0	0	0	3	0	0	5	0	0.122873	0	0	0	0	0.455924	0	0	0.577557
hsa-miR-6769b-3p	0	0	0	1	0	1	0	0	0	0	0	0	0	0.169504	0	0.167982	0	0	0	0
hsa-miR-6769b-5p	0	0	1	0	0	0	0	0	0	0	0	0	0.144174	0	0	0	0	0	0	0
hsa-miR-6770-3p	0	1	0	1	0	1	1	1	3	8	0	0.122873	0	0.169504	0	0.167982	0.151975	0.121608	0.390372	0.924092
hsa-miR-6770-5p	0	0	1	0	0	0	0	0	0	1	0	0	0.144174	0	0	0	0	0	0	0.115511
hsa-miR-6772-3p	5	19	14	20	9	6	36	5	13	9	0.856552	2.33459	2.01844	3.39009	1.30518	1.00789	5.47109	0.608042	1.69161	1.0396
hsa-miR-6772-5p	0	0	0	0	0	0	1	0	0	0	0	0	0	0	0	0	0.151975	0	0	0
hsa-miR-6773-5p	0	0	0	0	3	0	0	0	0	0	0	0	0	0	0.435061	0	0	0	0	0
hsa-miR-6776-5p	0	0	0	0	0	0	3	0	0	0	0	0	0	0	0	0	0.455924	0	0	0
hsa-miR-6777-5p	0	0	1	0	2	0	0	0	0	0	0	0	0.144174	0	0.29004	0	0	0	0	0
hsa-miR-6779-5p	0	0	0	0	0	0	0	0	0	1	0	0	0	0	0	0	0	0	0	0.115511
hsa-miR-6780a-5p	0	0	0	0	1	0	0	0	0	0	0	0	0	0	0.14502	0	0	0	0	0
hsa-miR-6780b-5p	0	0	0	0	0	0	0	2	0	0	0	0	0	0	0	0	0	0.243217	0	0
hsa-miR-6782-3p	0	0	4	0	1	0	0	0	0	2	0	0	0.576696	0	0.14502	0	0	0	0	0.231023
hsa-miR-6783-3p	0	0	0	4	0	0	0	0	5	0	0	0	0	0.678018	0	0	0	0	0.65062	0
hsa-miR-6783-5p	0	0	0	0	0	0	0	0	0	1	0	0	0	0	0	0	0	0	0	0.115511
hsa-miR-6784-3p	0	2	0	0	0	0	0	1	0	0	0	0.245746	0	0	0	0	0	0.121608	0	0
hsa-miR-6786-3p	3	2	0	4	12	0	2	0	5	5	0.513931	0.245746	0	0.678018	1.74024	0	0.30395	0	0.65062	0.577557
hsa-miR-6787-3p	0	1	0	0	0	0	2	2	1	1	0	0.122873	0	0	0	0	0.30395	0.243217	0.130124	0.115511
hsa-miR-6787-5p	2	0	0	0	0	0	0	0	0	0	0.342621	0	0	0	0	0	0	0	0	0
hsa-miR-6789-3p	0	2	2	0	0	0	0	0	1	0	0	0.245746	0.288348	0	0	0	0	0	0.130124	0
hsa-miR-6791-3p	0	0	0	0	0	0	1	0	0	0	0	0	0	0	0	0	0.151975	0	0	0
hsa-miR-6793-5p	0	0	0	0	2	0	0	0	0	4	0	0	0	0	0.29004	0	0	0	0	0.462046
hsa-miR-6796-3p	0	0	0	0	0	0	0	0	0	5	0	0	0	0	0	0	0	0	0	0.577557
hsa-miR-6797-3p	0	0	0	1	0	0	5	0	0	0	0	0	0	0.169504	0	0	0.759874	0	0	0
hsa-miR-6797-5p	0	0	1	0	0	0	0	2	0	0	0	0	0.144174	0	0	0	0	0.243217	0	0
hsa-miR-6798-3p	0	0	1	0	0	0	1	0	2	0	0	0	0.144174	0	0	0	0.151975	0	0.260248	0
hsa-miR-6800-3p	0	0	0	0	0	0	1	0	0	0	0	0	0	0	0	0	0.151975	0	0	0
hsa-miR-6802-3p	0	0	2	0	2	0	1	0	1	1	0	0	0.288348	0	0.29004	0	0.151975	0	0.130124	0.115511
hsa-miR-6802-5p	0	0	0	1	0	0	0	0	0	0	0	0	0	0.169504	0	0	0	0	0	0
hsa-miR-6803-3p	0	0	0	2	2	0	0	0	0	2	0	0	0	0.339009	0.29004	0	0	0	0	0.231023
hsa-miR-6804-3p	0	0	0	0	0	0	0	0	1	0	0	0	0	0	0	0	0	0	0.130124	0
hsa-miR-6804-5p	2	0	0	0	2	0	0	1	0	0	0.342621	0	0	0	0.29004	0	0	0.121608	0	0
hsa-miR-6806-3p	2	8	8	15	7	6	17	8	11	2	0.342621	0.982986	1.15339	2.54257	1.01514	1.00789	2.58357	0.972868	1.43136	0.231023
hsa-miR-6807-5p	0	0	0	1	0	0	0	0	0	0	0	0	0	0.169504	0	0	0	0	0	0
hsa-miR-6808-3p	0	0	0	0	4	0	0	0	1	1	0	0	0	0	0.580081	0	0	0	0.130124	0.115511
hsa-miR-6809-3p	0	0	0	0	0	4	0	1	0	0	0	0	0	0	0	0.67193	0	0.121608	0	0
hsa-miR-6809-5p	0	0	0	0	0	0	0	1	0	0	0	0	0	0	0	0	0	0.121608	0	0
hsa-miR-6810-3p	0	0	1	0	0	0	0	0	0	5	0	0	0.144174	0	0	0	0	0	0	0.577557
hsa-miR-6810-5p	1	0	0	0	0	0	0	0	0	0	0.17131	0	0	0	0	0	0	0	0	0
hsa-miR-6811-5p	2	5	0	2	1	0	7	0	0	1	0.342621	0.614366	0	0.339009	0.14502	0	1.06382	0	0	0.115511
hsa-miR-6812-3p	0	0	0	0	1	0	4	0	1	0	0	0	0	0	0.14502	0	0.607899	0	0.130124	0
hsa-miR-6813-5p	0	0	0	2	0	0	0	0	0	4	0	0	0	0.339009	0	0	0	0	0	0.462046
hsa-miR-6814-5p	0	0	0	0	0	0	0	0	0	1	0	0	0	0	0	0	0	0	0	0.115511
hsa-miR-6815-3p	9	0	1	0	0	0	0	0	0	0	1.54179	0	0.144174	0	0	0	0	0	0	0
hsa-miR-6815-5p	1	3	3	2	6	0	1	10	1	3	0.17131	0.36862	0.432522	0.339009	0.870121	0	0.151975	1.21608	0.130124	0.346534
hsa-miR-6817-3p	0	0	1	0	0	1	0	0	0	0	0	0	0.144174	0	0	0.167982	0	0	0	0
hsa-miR-6818-3p	12	25	10	8	3	7	9	4	13	7	2.05573	3.07183	1.44174	1.35604	0.435061	1.17588	1.36777	0.486434	1.69161	0.80858
hsa-miR-6818-5p	3	3	5	0	5	0	2	3	0	0	0.513931	0.36862	0.72087	0	0.725101	0	0.30395	0.364825	0	0
hsa-miR-6819-3p	0	0	0	3	0	1	2	0	6	0	0	0	0	0.508513	0	0.167982	0.30395	0	0.780744	0
hsa-miR-6820-5p	0	0	2	3	0	1	0	1	0	0	0	0	0.288348	0.508513	0	0.167982	0	0.121608	0	0
hsa-miR-6825-5p	0	0	3	0	0	0	0	1	0	3	0	0	0.432522	0	0	0	0	0.121608	0	0.346534
hsa-miR-6827-3p	1	1	1	0	0	0	2	2	3	0	0.17131	0.122873	0.144174	0	0	0	0.30395	0.243217	0.390372	0
hsa-miR-6827-5p	1	2	1	0	6	0	0	0	1	5	0.17131	0.245746	0.144174	0	0.870121	0	0	0	0.130124	0.577557
hsa-miR-6828-5p	0	1	2	0	0	0	0	1	0	3	0	0.122873	0.288348	0	0	0	0	0.121608	0	0.346534
hsa-miR-6830-3p	0	0	2	0	0	0	2	0	0	0	0	0	0.288348	0	0	0	0.30395	0	0	0
hsa-miR-6830-5p	2	0	0	0	0	0	0	0	5	0	0.342621	0	0	0	0	0	0	0	0.65062	0
hsa-miR-6833-3p	0	0	0	0	0	0	0	0	2	0	0	0	0	0	0	0	0	0	0.260248	0
hsa-miR-6834-3p	0	0	1	0	0	0	0	0	0	0	0	0	0.144174	0	0	0	0	0	0	0
hsa-miR-6837-3p	0	0	0	4	2	4	0	0	2	0	0	0	0	0.678018	0.29004	0.67193	0	0	0.260248	0
hsa-miR-6837-5p	0	0	0	0	0	0	0	2	1	0	0	0	0	0	0	0	0	0.243217	0.130124	0
hsa-miR-6838-5p	1	0	1	0	0	0	1	1	0	0	0.17131	0	0.144174	0	0	0	0.151975	0.121608	0	0
hsa-miR-6840-5p	0	10	3	0	2	2	0	1	1	0	0	1.22873	0.432522	0	0.29004	0.335965	0	0.121608	0.130124	0
hsa-miR-6841-5p	0	0	2	0	0	0	0	0	0	0	0	0	0.288348	0	0	0	0	0	0	0
hsa-miR-6842-3p	145	266	317	335	196	237	267	255	318	179	24.84	32.6843	45.7032	56.784	28.424	39.8118	40.5773	31.0102	41.3795	20.6766
hsa-miR-6842-5p	0	0	0	0	1	0	0	0	0	0	0	0	0	0	0.14502	0	0	0	0	0
hsa-miR-6844	0	0	0	0	1	0	0	0	1	0	0	0	0	0	0.14502	0	0	0	0.130124	0
hsa-miR-6845-5p	0	0	6	0	0	0	0	0	0	0	0	0	0.865045	0	0	0	0	0	0	0
hsa-miR-6847-5p	1	2	0	0	2	0	0	0	0	0	0.17131	0.245746	0	0	0.29004	0	0	0	0	0
hsa-miR-6848-5p	0	0	0	0	0	1	0	0	0	0	0	0	0	0	0	0.167982	0	0	0	0
hsa-miR-6849-5p	0	0	0	0	4	0	0	0	0	0	0	0	0	0	0.580081	0	0	0	0	0
hsa-miR-6850-5p	0	0	1	0	0	0	0	0	0	0	0	0	0.144174	0	0	0	0	0	0	0
hsa-miR-6851-5p	0	0	0	0	0	0	0	0	0	2	0	0	0	0	0	0	0	0	0	0.231023
hsa-miR-6852-3p	0	1	0	0	0	0	0	0	0	0	0	0.122873	0	0	0	0	0	0	0	0
hsa-miR-6852-5p	4	6	7	4	7	1	2	4	3	6	0.685242	0.737239	1.00922	0.678018	1.01514	0.167982	0.30395	0.486434	0.390372	0.693069
hsa-miR-6853-3p	0	0	0	1	0	0	0	0	0	0	0	0	0	0.169504	0	0	0	0	0	0
hsa-miR-6854-3p	0	0	0	0	0	0	1	3	0	0	0	0	0	0	0	0	0.151975	0.364825	0	0
hsa-miR-6854-5p	0	6	2	0	0	0	1	0	0	1	0	0.737239	0.288348	0	0	0	0.151975	0	0	0.115511
hsa-miR-6855-3p	1	0	1	3	0	0	0	1	0	1	0.17131	0	0.144174	0.508513	0	0	0	0.121608	0	0.115511
hsa-miR-6855-5p	2	0	0	1	0	0	0	0	0	2	0.342621	0	0	0.169504	0	0	0	0	0	0.231023
hsa-miR-6856-3p	0	0	0	1	0	0	1	0	0	0	0	0	0	0.169504	0	0	0.151975	0	0	0
hsa-miR-6857-3p	0	0	1	0	0	0	0	0	0	0	0	0	0.144174	0	0	0	0	0	0	0
hsa-miR-6858-5p	0	0	0	0	5	0	0	0	0	0	0	0	0	0	0.725101	0	0	0	0	0
hsa-miR-6859-5p	2	0	1	4	0	0	0	0	0	0	0.342621	0	0.144174	0.678018	0	0	0	0	0	0
hsa-miR-6860	0	4	4	1	0	0	0	1	4	0	0	0.491493	0.576696	0.169504	0	0	0	0.121608	0.520496	0
hsa-miR-6866-3p	0	0	1	0	0	0	0	0	0	0	0	0	0.144174	0	0	0	0	0	0	0
hsa-miR-6866-5p	17	33	19	16	16	23	29	34	23	38	2.91228	4.05482	2.73931	2.71207	2.32032	3.86359	4.40727	4.13469	2.99285	4.38944
hsa-miR-6868-3p	7	5	6	2	3	6	12	4	5	8	1.19917	0.614366	0.865045	0.339009	0.435061	1.00789	1.8237	0.486434	0.65062	0.924092
hsa-miR-6870-3p	0	1	2	4	4	0	0	0	0	1	0	0.122873	0.288348	0.678018	0.580081	0	0	0	0	0.115511
hsa-miR-6871-5p	0	0	0	0	0	0	0	0	0	6	0	0	0	0	0	0	0	0	0	0.693069
hsa-miR-6873-3p	3	5	2	6	2	2	2	0	2	7	0.513931	0.614366	0.288348	1.01703	0.29004	0.335965	0.30395	0	0.260248	0.80858
hsa-miR-6874-5p	0	0	0	0	2	0	0	0	0	0	0	0	0	0	0.29004	0	0	0	0	0
hsa-miR-6875-5p	1	0	0	0	0	0	0	0	1	0	0.17131	0	0	0	0	0	0	0	0.130124	0
hsa-miR-6876-5p	0	0	1	0	0	0	0	0	0	0	0	0	0.144174	0	0	0	0	0	0	0
hsa-miR-6877-5p	0	2	1	10	3	0	3	1	1	1	0	0.245746	0.144174	1.69504	0.435061	0	0.455924	0.121608	0.130124	0.115511
hsa-miR-6878-5p	0	0	0	0	0	2	0	0	1	0	0	0	0	0	0	0.335965	0	0	0.130124	0
hsa-miR-6881-3p	0	0	0	1	1	5	0	0	0	0	0	0	0	0.169504	0.14502	0.839912	0	0	0	0
hsa-miR-6882-3p	0	0	0	0	1	0	0	0	0	0	0	0	0	0	0.14502	0	0	0	0	0
hsa-miR-6882-5p	5	3	0	3	1	2	2	4	11	6	0.856552	0.36862	0	0.508513	0.14502	0.335965	0.30395	0.486434	1.43136	0.693069
hsa-miR-6883-3p	1	0	0	0	0	0	0	0	0	0	0.17131	0	0	0	0	0	0	0	0	0
hsa-miR-6884-5p	0	2	0	0	1	0	0	0	9	0	0	0.245746	0	0	0.14502	0	0	0	1.17112	0
hsa-miR-6885-3p	0	1	1	1	0	0	0	0	0	0	0	0.122873	0.144174	0.169504	0	0	0	0	0	0
hsa-miR-6886-3p	0	0	0	0	0	0	0	1	0	0	0	0	0	0	0	0	0	0.121608	0	0
hsa-miR-6888-3p	0	0	0	0	0	1	0	1	0	0	0	0	0	0	0	0.167982	0	0.121608	0	0
hsa-miR-6892-5p	0	0	2	6	0	0	4	4	0	0	0	0	0.288348	1.01703	0	0	0.607899	0.486434	0	0
hsa-miR-6894-3p	0	0	0	0	1	1	0	4	0	0	0	0	0	0	0.14502	0.167982	0	0.486434	0	0
hsa-miR-6894-5p	0	0	0	0	0	0	0	1	0	0	0	0	0	0	0	0	0	0.121608	0	0
hsa-miR-6895-3p	0	0	0	0	0	1	0	1	0	0	0	0	0	0	0	0.167982	0	0.121608	0	0
hsa-miR-6895-5p	0	0	0	0	0	0	2	0	0	1	0	0	0	0	0	0	0.30395	0	0	0.115511
hsa-miR-708-3p	2355	3079	3487	3843	2570	3139	2805	4352	4291	3622	403.436	378.327	502.735	651.405	372.702	527.297	426.289	529.24	558.362	418.383
hsa-miR-708-5p	1343	1514	1868	699	1876	470	915	934	700	1324	230.07	186.03	269.317	118.484	272.058	78.9517	139.057	113.582	91.0868	152.937
hsa-miR-7108-5p	0	0	0	0	0	0	0	0	1	0	0	0	0	0	0	0	0	0	0.130124	0
hsa-miR-7109-3p	0	0	0	0	1	0	0	0	0	0	0	0	0	0	0.14502	0	0	0	0	0
hsa-miR-7110-3p	0	2	1	0	2	0	0	0	0	1	0	0.245746	0.144174	0	0.29004	0	0	0	0	0.115511
hsa-miR-7111-3p	0	0	1	1	2	3	4	1	0	0	0	0	0.144174	0.169504	0.29004	0.503947	0.607899	0.121608	0	0
hsa-miR-7113-5p	1	2	1	3	0	5	1	6	4	6	0.17131	0.245746	0.144174	0.508513	0	0.839912	0.151975	0.729651	0.520496	0.693069
hsa-miR-7114-3p	1	0	0	1	0	0	0	0	0	0	0.17131	0	0	0.169504	0	0	0	0	0	0
hsa-miR-7114-5p	0	0	1	3	0	0	1	0	1	5	0	0	0.144174	0.508513	0	0	0.151975	0	0.130124	0.577557
hsa-miR-7-1-3p	32	59	52	25	39	14	50	40	23	29	5.48194	7.24952	7.49705	4.23761	5.65579	2.35175	7.59874	4.86434	2.99285	3.34983
hsa-miR-7151-5p	0	0	0	1	0	0	0	0	0	0	0	0	0	0.169504	0	0	0	0	0	0
hsa-miR-7155-3p	1	0	2	0	0	0	0	0	1	4	0.17131	0	0.288348	0	0	0	0	0	0.130124	0.462046
hsa-miR-744-3p	2	4	5	6	3	7	4	7	2	10	0.342621	0.491493	0.72087	1.01703	0.435061	1.17588	0.607899	0.851259	0.260248	1.15511
hsa-miR-744-5p	1330	2710	2735	2517	2619	1256	1711	1946	2127	2575	227.843	332.987	394.316	426.643	379.808	210.986	260.029	236.65	276.774	297.442
hsa-miR-758-3p	1	3	1	3	2	3	1	4	2	2	0.17131	0.36862	0.144174	0.508513	0.29004	0.503947	0.151975	0.486434	0.260248	0.231023
hsa-miR-7-5p	20326	26186	17487	9612	14396	15950	18042	20392	18978	21803	3482.06	3217.56	2521.17	1629.28	2087.71	2679.32	2741.93	2479.84	2469.49	2518.5
hsa-miR-760	8	8	7	18	13	5	6	19	8	21	1.37048	0.982986	1.00922	3.05108	1.88526	0.839912	0.911849	2.31056	1.04099	2.42574
hsa-miR-765	0	0	2	2	0	2	0	2	0	1	0	0	0.288348	0.339009	0	0.335965	0	0.243217	0	0.115511
hsa-miR-766-3p	10	14	19	1	22	7	12	14	11	8	1.7131	1.72023	2.73931	0.169504	3.19044	1.17588	1.8237	1.70252	1.43136	0.924092
hsa-miR-766-5p	0	0	0	0	8	0	0	1	0	3	0	0	0	0	1.16016	0	0	0.121608	0	0.346534
hsa-miR-767-5p	0	5	3	0	0	0	0	0	0	0	0	0.614366	0.432522	0	0	0	0	0	0	0
hsa-miR-769-3p	10	5	24	7	16	2	8	11	3	1	1.7131	0.614366	3.46018	1.18653	2.32032	0.335965	1.2158	1.33769	0.390372	0.115511
hsa-miR-769-5p	401	633	790	504	717	477	542	862	655	609	68.6955	77.7788	113.898	85.4302	103.979	80.1276	82.3703	104.827	85.2313	70.3465
hsa-miR-7704	3	3	19	11	6	9	12	17	13	13	0.513931	0.36862	2.73931	1.86455	0.870121	1.51184	1.8237	2.06734	1.69161	1.50165
hsa-miR-7705	1	0	0	0	0	0	0	1	0	1	0.17131	0	0	0	0	0	0	0.121608	0	0.115511
hsa-miR-7706	421	805	826	857	575	788	791	863	1069	759	72.1217	98.913	119.088	145.265	83.3866	132.37	120.212	104.948	139.103	87.6732
hsa-miR-7845-5p	0	2	0	1	0	0	2	1	0	1	0	0.245746	0	0.169504	0	0	0.30395	0.121608	0	0.115511
hsa-miR-7850-5p	0	0	0	0	1	0	0	0	0	0	0	0	0	0	0.14502	0	0	0	0	0
hsa-miR-7854-3p	1	0	7	3	4	1	2	3	1	8	0.17131	0	1.00922	0.508513	0.580081	0.167982	0.30395	0.364825	0.130124	0.924092
hsa-miR-7974	58	81	100	52	88	94	94	128	119	127	9.93601	9.95273	14.4174	8.81423	12.7618	15.7903	14.2856	15.5659	15.4848	14.67
hsa-miR-7976	8	9	10	30	12	4	6	5	11	15	1.37048	1.10586	1.44174	5.08513	1.74024	0.67193	0.911849	0.608042	1.43136	1.73267
hsa-miR-7977	0	1	1	1	0	0	0	0	0	0	0	0.122873	0.144174	0.169504	0	0	0	0	0	0
hsa-miR-802	2	0	1	2	1	0	0	0	0	0	0.342621	0	0.144174	0.339009	0.14502	0	0	0	0	0
hsa-miR-8078	0	0	0	0	0	0	1	0	0	0	0	0	0	0	0	0	0.151975	0	0	0
hsa-miR-8485	6	5	8	19	13	10	12	5	6	5	1.02786	0.614366	1.15339	3.22058	1.88526	1.67982	1.8237	0.608042	0.780744	0.577557
hsa-miR-873-3p	19	33	47	24	38	4	6	24	6	26	3.2549	4.05482	6.77618	4.06811	5.51077	0.67193	0.911849	2.9186	0.780744	3.0033
hsa-miR-873-5p	13	13	12	6	10	6	12	10	3	8	2.22704	1.59735	1.73009	1.01703	1.4502	1.00789	1.8237	1.21608	0.390372	0.924092
hsa-miR-874-3p	49	85	135	66	118	25	26	56	71	127	8.39421	10.4442	19.4635	11.1873	17.1124	4.19956	3.95134	6.81008	9.23881	14.67
hsa-miR-874-5p	0	0	0	1	0	0	0	1	0	0	0	0	0	0.169504	0	0	0	0.121608	0	0
hsa-miR-876-3p	7	5	8	2	13	2	4	9	5	10	1.19917	0.614366	1.15339	0.339009	1.88526	0.335965	0.607899	1.09448	0.65062	1.15511
hsa-miR-876-5p	0	0	0	0	0	0	0	0	1	0	0	0	0	0	0	0	0	0	0.130124	0
hsa-miR-877-3p	2	6	8	5	2	1	6	1	5	5	0.342621	0.737239	1.15339	0.847522	0.29004	0.167982	0.911849	0.121608	0.65062	0.577557
hsa-miR-877-5p	25	25	80	27	78	19	37	44	42	36	4.28276	3.07183	11.5339	4.57662	11.3116	3.19167	5.62307	5.35077	5.46521	4.15841
hsa-miR-885-5p	0	0	0	0	0	1	0	0	0	0	0	0	0	0	0	0.167982	0	0	0	0
hsa-miR-887-3p	9	10	9	10	13	1	3	18	7	7	1.54179	1.22873	1.29757	1.69504	1.88526	0.167982	0.455924	2.18895	0.910868	0.80858
hsa-miR-887-5p	6	4	3	2	10	5	3	2	6	9	1.02786	0.491493	0.432522	0.339009	1.4502	0.839912	0.455924	0.243217	0.780744	1.0396
hsa-miR-888-5p	0	0	0	0	2	0	0	0	0	2	0	0	0	0	0.29004	0	0	0	0	0.231023
hsa-miR-889-3p	4	1	0	2	5	2	4	4	0	5	0.685242	0.122873	0	0.339009	0.725101	0.335965	0.607899	0.486434	0	0.577557
hsa-miR-891a-5p	0	0	0	1	0	0	0	1	0	0	0	0	0	0.169504	0	0	0	0.121608	0	0
hsa-miR-892a	2	0	2	7	2	2	3	0	4	9	0.342621	0	0.288348	1.18653	0.29004	0.335965	0.455924	0	0.520496	1.0396
hsa-miR-92a-1-5p	21	37	34	33	40	31	43	43	57	67	3.59752	4.54631	4.90192	5.59365	5.80081	5.20745	6.53492	5.22917	7.41707	7.73927
hsa-miR-92a-3p	8153	12491	11918	10333	12579	11560	10820	14218	13544	12301	1396.69	1534.81	1718.27	1751.49	1824.21	1941.88	1644.37	1729.03	1762.4	1420.91
hsa-miR-92b-3p	1267	1913	2413	1622	1827	1927	2103	2159	2392	2140	217.05	235.057	347.892	274.936	264.952	323.702	319.603	262.553	311.257	247.195
hsa-miR-92b-5p	51	51	62	51	80	53	47	38	99	93	8.73684	6.26654	8.93879	8.64472	11.6016	8.90307	7.14282	4.62112	12.8823	10.7426
hsa-miR-933	0	0	0	0	0	0	0	7	1	0	0	0	0	0	0	0	0	0.851259	0.130124	0
hsa-miR-93-3p	25	18	29	9	30	10	9	13	23	27	4.28276	2.21172	4.18105	1.52554	4.35061	1.67982	1.36777	1.58091	2.99285	3.11881
hsa-miR-935	52	96	122	70	129	68	79	135	116	129	8.90815	11.7958	17.5892	11.8653	18.7076	11.4228	12.006	16.4171	15.0944	14.901
hsa-miR-93-5p	2134	2347	3046	995	3205	813	1272	2007	1321	2269	365.577	288.384	439.154	168.657	464.79	136.57	193.312	244.068	171.894	262.096
hsa-miR-937-3p	4	15	14	9	13	10	19	9	7	22	0.685242	1.8431	2.01844	1.52554	1.88526	1.67982	2.88752	1.09448	0.910868	2.54125
hsa-miR-939-5p	1	1	0	0	0	0	4	0	2	1	0.17131	0.122873	0	0	0	0	0.607899	0	0.260248	0.115511
hsa-miR-9-3p	3	1	5	0	2	1	3	1	1	6	0.513931	0.122873	0.72087	0	0.29004	0.167982	0.455924	0.121608	0.130124	0.693069
hsa-miR-940	0	0	6	1	0	3	0	1	1	3	0	0	0.865045	0.169504	0	0.503947	0	0.121608	0.130124	0.346534
hsa-miR-941	4216	7971	6101	6921	5009	8067	7007	8174	10606	7806	722.245	979.423	879.606	1173.14	726.406	1355.11	1064.89	994.028	1380.1	901.683
hsa-miR-942-3p	2	2	1	0	3	0	0	2	0	2	0.342621	0.245746	0.144174	0	0.435061	0	0	0.243217	0	0.231023
hsa-miR-942-5p	3	1	7	3	5	6	7	9	4	1	0.513931	0.122873	1.00922	0.508513	0.725101	1.00789	1.06382	1.09448	0.520496	0.115511
hsa-miR-943	1	3	0	4	0	0	0	1	0	1	0.17131	0.36862	0	0.678018	0	0	0	0.121608	0	0.115511
hsa-miR-944	0	0	0	0	1	0	0	0	0	0	0	0	0	0	0.14502	0	0	0	0	0
hsa-miR-95-3p	1	3	5	5	4	2	1	1	3	0	0.17131	0.36862	0.72087	0.847522	0.580081	0.335965	0.151975	0.121608	0.390372	0
hsa-miR-9-5p	99	98	122	67	81	77	78	202	83	125	16.9597	12.0416	17.5892	11.3568	11.7466	12.9346	11.854	24.5649	10.8003	14.4389
hsa-miR-96-3p	0	2	0	0	0	1	0	1	0	1	0	0.245746	0	0	0	0.167982	0	0.121608	0	0.115511
hsa-miR-96-5p	3435	5053	5648	2980	6674	2870	3485	7025	4708	6566	588.452	620.879	814.295	505.123	967.865	482.109	529.632	854.3	612.624	758.448
hsa-miR-98-3p	0	4	4	0	2	0	4	1	2	1	0	0.491493	0.576696	0	0.29004	0	0.607899	0.121608	0.260248	0.115511
hsa-miR-98-5p	3632	4121	5558	2257	5435	1869	2847	3981	2090	4252	622.2	506.361	801.32	382.571	788.185	313.959	432.672	484.123	271.959	491.155
hsa-miR-9898	1	0	0	0	0	0	0	2	0	0	0.17131	0	0	0	0	0	0	0.243217	0	0
hsa-miR-9901	0	3	0	0	0	0	7	0	2	0	0	0.36862	0	0	0	0	1.06382	0	0.260248	0
hsa-miR-9903	0	2	7	0	8	2	7	9	6	4	0	0.245746	1.00922	0	1.16016	0.335965	1.06382	1.09448	0.780744	0.462046
hsa-miR-99a-3p	0	2	3	3	3	5	0	0	2	1	0	0.245746	0.432522	0.508513	0.435061	0.839912	0	0	0.260248	0.115511
hsa-miR-99a-5p	35482	52897	45632	45714	52689	31320	48987	48748	49530	57551	6078.44	6499.63	6578.95	7748.72	7640.97	5261.21	7444.79	5928.17	6445.04	6647.8
hsa-miR-99b-3p	2719	5161	4626	5335	4014	4564	4458	5440	6895	4986	465.793	634.149	666.949	904.306	582.111	766.672	677.504	661.55	897.205	575.94
hsa-miR-99b-5p	29642	48185	33751	41536	29942	42005	46176	43258	56973	50932	5077.99	5920.65	4866.02	7040.53	4342.19	7056.1	7017.59	5260.54	7413.56	5883.23
novel_1	0	2	0	0	0	0	13	5	3	2	0	0.245746	0	0	0	0	1.97567	0.608042	0.390372	0.231023
novel_10	0	0	0	0	0	0	1	0	0	0	0	0	0	0	0	0	0.151975	0	0	0
novel_11	1	3	1	3	7	3	3	7	1	4	0.17131	0.36862	0.144174	0.508513	1.01514	0.503947	0.455924	0.851259	0.130124	0.462046
novel_12	72	69	87	130	37	103	204	106	177	153	12.3344	8.47825	12.5431	22.0356	5.36575	17.3022	31.0029	12.8905	23.032	17.6733
novel_13	98	202	116	208	159	159	205	170	207	216	16.7884	24.8204	16.7242	35.2569	23.0582	26.7092	31.1548	20.6734	26.9357	24.9505
novel_14	26	40	28	44	20	59	38	15	88	54	4.45407	4.91493	4.03687	7.45819	2.9004	9.91096	5.77504	1.82413	11.4509	6.23762
novel_15	4	1	0	4	2	0	1	3	2	0	0.685242	0.122873	0	0.678018	0.29004	0	0.151975	0.364825	0.260248	0
novel_16	0	1	5	0	0	0	3	4	0	0	0	0.122873	0.72087	0	0	0	0.455924	0.486434	0	0
novel_17	0	1	3	5	0	0	0	3	0	1	0	0.122873	0.432522	0.847522	0	0	0	0.364825	0	0.115511
novel_18	0	2	1	1	2	1	0	1	0	2	0	0.245746	0.144174	0.169504	0.29004	0.167982	0	0.121608	0	0.231023
novel_19	0	0	0	0	0	0	0	5	0	0	0	0	0	0	0	0	0	0.608042	0	0
novel_2	0	1	4	0	3	1	0	6	1	1	0	0.122873	0.576696	0	0.435061	0.167982	0	0.729651	0.130124	0.115511
novel_20	0	0	0	0	0	0	0	2	0	0	0	0	0	0	0	0	0	0.243217	0	0
novel_21	0	2	1	0	2	1	3	8	5	1	0	0.245746	0.144174	0	0.29004	0.167982	0.455924	0.972868	0.65062	0.115511
novel_22	0	9	1	5	1	0	4	4	5	0	0	1.10586	0.144174	0.847522	0.14502	0	0.607899	0.486434	0.65062	0
novel_23	2	0	0	0	1	1	0	2	4	2	0.342621	0	0	0	0.14502	0.167982	0	0.243217	0.520496	0.231023
novel_24	1	8	1	0	2	1	2	2	0	0	0.17131	0.982986	0.144174	0	0.29004	0.167982	0.30395	0.243217	0	0
novel_25	2	1	4	1	4	9	3	6	8	9	0.342621	0.122873	0.576696	0.169504	0.580081	1.51184	0.455924	0.729651	1.04099	1.0396
novel_26	0	3	6	0	1	1	5	2	0	4	0	0.36862	0.865045	0	0.14502	0.167982	0.759874	0.243217	0	0.462046
novel_27	1	5	2	2	6	6	8	15	7	5	0.17131	0.614366	0.288348	0.339009	0.870121	1.00789	1.2158	1.82413	0.910868	0.577557
novel_28	3	4	1	4	14	6	3	4	4	3	0.513931	0.491493	0.144174	0.678018	2.03028	1.00789	0.455924	0.486434	0.520496	0.346534
novel_29	3	2	5	3	9	4	0	6	4	19	0.513931	0.245746	0.72087	0.508513	1.30518	0.67193	0	0.729651	0.520496	2.19472
novel_3	1	4	0	0	0	0	1	4	3	0	0.17131	0.491493	0	0	0	0	0.151975	0.486434	0.390372	0
novel_30	14	23	34	15	20	3	12	7	17	20	2.39835	2.82608	4.90192	2.54257	2.9004	0.503947	1.8237	0.851259	2.21211	2.31023
novel_31	0	3	2	4	0	0	0	0	7	2	0	0.36862	0.288348	0.678018	0	0	0	0	0.910868	0.231023
novel_32	0	0	0	0	0	0	0	0	2	3	0	0	0	0	0	0	0	0	0.260248	0.346534
novel_33	0	1	1	0	0	1	4	3	1	5	0	0.122873	0.144174	0	0	0.167982	0.607899	0.364825	0.130124	0.577557
novel_34	0	0	1	0	0	0	5	0	0	1	0	0	0.144174	0	0	0	0.759874	0	0	0.115511
novel_36	1	4	1	0	1	0	10	0	4	0	0.17131	0.491493	0.144174	0	0.14502	0	1.51975	0	0.520496	0
novel_37	4	0	1	2	5	4	4	3	9	0	0.685242	0	0.144174	0.339009	0.725101	0.67193	0.607899	0.364825	1.17112	0
novel_38	1	2	1	1	0	1	3	2	0	0	0.17131	0.245746	0.144174	0.169504	0	0.167982	0.455924	0.243217	0	0
novel_39	2	2	0	2	0	0	1	0	2	0	0.342621	0.245746	0	0.339009	0	0	0.151975	0	0.260248	0
novel_4	0	0	0	0	4	1	0	3	0	0	0	0	0	0	0.580081	0.167982	0	0.364825	0	0
novel_40	0	4	0	4	0	0	4	0	2	0	0	0.491493	0	0.678018	0	0	0.607899	0	0.260248	0
novel_41	5	14	3	1	7	5	3	15	24	8	0.856552	1.72023	0.432522	0.169504	1.01514	0.839912	0.455924	1.82413	3.12298	0.924092
novel_42	0	0	4	5	0	0	0	0	0	0	0	0	0.576696	0.847522	0	0	0	0	0	0
novel_43	3	20	8	8	14	2	19	13	22	7	0.513931	2.45746	1.15339	1.35604	2.03028	0.335965	2.88752	1.58091	2.86273	0.80858
novel_44	3	1	0	1	2	1	2	0	0	0	0.513931	0.122873	0	0.169504	0.29004	0.167982	0.30395	0	0	0
novel_45	17	33	8	12	32	20	17	12	4	6	2.91228	4.05482	1.15339	2.03405	4.64065	3.35965	2.58357	1.4593	0.520496	0.693069
novel_47	0	0	2	0	0	0	0	0	10	0	0	0	0.288348	0	0	0	0	0	1.30124	0
novel_48	0	0	0	0	0	1	0	0	0	9	0	0	0	0	0	0.167982	0	0	0	1.0396
novel_49	0	0	2	0	0	1	0	0	0	6	0	0	0.288348	0	0	0.167982	0	0	0	0.693069
novel_5	2	0	3	0	0	0	0	1	0	0	0.342621	0	0.432522	0	0	0	0	0.121608	0	0
novel_50	0	3	0	0	1	4	1	4	1	1	0	0.36862	0	0	0.14502	0.67193	0.151975	0.486434	0.130124	0.115511
novel_51	0	0	1	0	1	1	3	2	0	0	0	0	0.144174	0	0.14502	0.167982	0.455924	0.243217	0	0
novel_52	0	0	0	0	4	2	0	0	0	2	0	0	0	0	0.580081	0.335965	0	0	0	0.231023
novel_53	0	1	4	0	0	0	1	0	0	2	0	0.122873	0.576696	0	0	0	0.151975	0	0	0.231023
novel_55	0	1	1	0	0	7	0	0	0	0	0	0.122873	0.144174	0	0	1.17588	0	0	0	0
novel_56	0	0	0	1	1	0	1	0	1	2	0	0	0	0.169504	0.14502	0	0.151975	0	0.130124	0.231023
novel_57	0	0	0	1	0	0	0	0	0	5	0	0	0	0.169504	0	0	0	0	0	0.577557
novel_58	3	1	0	1	5	0	0	0	0	0	0.513931	0.122873	0	0.169504	0.725101	0	0	0	0	0
novel_6	0	0	0	0	0	0	0	0	0	4	0	0	0	0	0	0	0	0	0	0.462046
novel_60	0	0	0	0	0	0	0	0	0	4	0	0	0	0	0	0	0	0	0	0.462046
novel_61	0	0	0	4	1	0	0	3	0	0	0	0	0	0.678018	0.14502	0	0	0.364825	0	0
novel_62	0	0	1	0	0	0	1	0	2	3	0	0	0.144174	0	0	0	0.151975	0	0.260248	0.346534
novel_66	5	3	6	22	2	0	7	9	2	11	0.856552	0.36862	0.865045	3.7291	0.29004	0	1.06382	1.09448	0.260248	1.27063
novel_68	0	0	0	0	0	2	0	2	5	0	0	0	0	0	0	0.335965	0	0.243217	0.65062	0
novel_69	0	0	0	0	3	0	0	1	3	0	0	0	0	0	0.435061	0	0	0.121608	0.390372	0
novel_7	0	0	0	0	0	0	0	0	0	4	0	0	0	0	0	0	0	0	0	0.462046
novel_70	0	0	0	0	0	8	0	0	0	0	0	0	0	0	0	1.34386	0	0	0	0
novel_71	0	1	0	0	3	0	0	0	0	0	0	0.122873	0	0	0.435061	0	0	0	0	0
novel_72	0	0	0	0	0	0	0	0	4	0	0	0	0	0	0	0	0	0	0.520496	0
novel_73	0	0	0	0	0	0	3	0	2	0	0	0	0	0	0	0	0.455924	0	0.260248	0
novel_74	0	0	6	0	0	0	0	0	1	0	0	0	0.865045	0	0	0	0	0	0.130124	0
novel_75	1	0	3	1	0	0	0	0	0	0	0.17131	0	0.432522	0.169504	0	0	0	0	0	0
novel_76	0	0	0	0	0	0	2	5	0	2	0	0	0	0	0	0	0.30395	0.608042	0	0.231023
novel_77	0	3	3	0	0	0	0	0	0	0	0	0.36862	0.432522	0	0	0	0	0	0	0
novel_8	0	1	0	1	0	0	0	0	0	2	0	0.122873	0	0.169504	0	0	0	0	0	0.231023
novel_9	0	0	0	0	0	0	0	0	2	0	0	0	0	0	0	0	0	0	0.260248	0
