# Supplementary material for: Conditioned medium from Adipose Stromal Cells reduces cisplatin-induced proximal tubular epithelial cell apoptosis via downregulation of miR-181a-5p
Source: Research Square preprint supplement (doi:10.21203/rs.3.rs-6751099/v1), 2025-06-09
Supplement: Supplementary file 2 [file d7d1b5902a4f4dd237384b61.xlsx]

## Sheet: Summary of data production
Table: Summary of the Data Production
Sample	Reads	Bases	Error rate	Q20	Q30	GC content
Cis_87	12632324	0.63G	0.01%	99.35%	97.60%	48.63%
Cis_96	14798935	0.74G	0.01%	99.41%	97.85%	48.33%
Cis_101	12496897	0.62G	0.01%	99.37%	97.70%	49.05%
Cis_SFM1	15597364	0.78G	0.01%	99.37%	97.71%	49.16%
Cis_SFM2	16459997	0.82G	0.01%	99.37%	97.75%	48.72%
CTR_87	15956032	0.80G	0.01%	99.38%	97.74%	49.02%
CTR_96	12622276	0.63G	0.01%	99.36%	97.70%	48.83%
CTR_101	12183144	0.61G	0.01%	99.36%	97.68%	49.08%
CTR_SMF1	11668317	0.58G	0.01%	99.42%	97.87%	48.17%
CTR_SFM2	10005043	0.50G	0.01%	99.37%	97.75%	48.44%

## Sheet: Data filtering summary
Table: Data filtering summary
Sample	total reads	N% > 10%	low quality	5' adapter contamine	3' adapter null or insert null	with ployA/T/G/C	clean reads
Cis_87	12632324 (100.00%)	50 (0.00%)	0 (0.00%)	5031 (0.04%)	156038 (1.24%)	11250 (0.09%)	12459955 (98.64%)
Cis_96	14798935 (100.00%)	49 (0.00%)	0 (0.00%)	2156 (0.01%)	156328 (1.06%)	11966 (0.08%)	14628436 (98.85%)
Cis_101	12496897 (100.00%)	36 (0.00%)	0 (0.00%)	2145 (0.02%)	131801 (1.05%)	13108 (0.10%)	12349807 (98.82%)
Cis_SFM1	15597364 (100.00%)	61 (0.00%)	0 (0.00%)	3152 (0.02%)	235418 (1.51%)	16704 (0.11%)	15342029 (98.36%)
Cis_SFM2	16459997 (100.00%)	52 (0.00%)	0 (0.00%)	2344 (0.01%)	239442 (1.45%)	16966 (0.10%)	16201193 (98.43%)
CTR_87	15956032 (100.00%)	51 (0.00%)	0 (0.00%)	2670 (0.02%)	237871 (1.49%)	13559 (0.08%)	15701881 (98.41%)
CTR_96	12622276 (100.00%)	54 (0.00%)	0 (0.00%)	3029 (0.02%)	304484 (2.41%)	7814 (0.06%)	12306895 (97.50%)
CTR_101	12183144 (100.00%)	55 (0.00%)	0 (0.00%)	2429 (0.02%)	261465 (2.15%)	12376 (0.10%)	11906819 (97.73%)
CTR_SMF1	11668317 (100.00%)	35 (0.00%)	0 (0.00%)	2617 (0.02%)	177343 (1.52%)	8892 (0.08%)	11479430 (98.38%)
CTR_SFM2	10005043 (100.00%)	37 (0.00%)	0 (0.00%)	5709 (0.06%)	179842 (1.80%)	3845 (0.04%)	9815610 (98.11%)

## Sheet: type and qty of sRNA
Table: Type and quantity of sRNA
Sample	Total reads	Total bases (bp)	Uniq reads	Uniq bases (bp)
Cis_87	11939769	281306712	390909	9658848
Cis_96	14105708	333654393	428315	10679732
Cis_101	11899291	290682861	437380	11264085
Cis_SFM1	14355888	348024961	458810	11791777
Cis_SFM2	15424583	371366777	429794	10943042
CTR_87	14844149	362060513	425895	11057921
CTR_96	11614707	271975205	389207	9563132
CTR_101	11137797	274915901	370838	9692136
CTR_SMF1	11171511	260640398	369057	9169883
CTR_SFM2	9048936	203879626	255078	5836560

## Sheet: Statistics of mapping
Table: Statistics of mapping results
Sample	Total sRNA	Mapped sRNA	"+" Mapped sRNA	"-" Mapped sRNA
CTR_SMF1	11171511 (100.00%)	8010995 (71.71%)	6322376 (56.59%)	1688619 (15.12%)
CTR_SFM2	9048936 (100.00%)	6490257 (71.72%)	5122173 (56.61%)	1368084 (15.12%)
CTR_96	11614707 (100.00%)	8460891 (72.85%)	6689160 (57.59%)	1771731 (15.25%)
CTR_101	11137797 (100.00%)	7903153 (70.96%)	6295319 (56.52%)	1607834 (14.44%)
Cis_SFM1	14355888 (100.00%)	10259979 (71.47%)	8018033 (55.85%)	2241946 (15.62%)
Cis_87	11939769 (100.00%)	8160236 (68.35%)	6413500 (53.72%)	1746736 (14.63%)
Cis_101	11899291 (100.00%)	8317863 (69.90%)	6490554 (54.55%)	1827309 (15.36%)
CTR_87	14844149 (100.00%)	10644573 (71.71%)	8387271 (56.50%)	2257302 (15.21%)
Cis_96	14105708 (100.00%)	9944173 (70.50%)	7809396 (55.36%)	2134777 (15.13%)
Cis_SFM2	15424583 (100.00%)	11081252 (71.84%)	8791362 (57.00%)	2289890 (14.85%)
